# Supplementary material for: A Comprehensive miRNome Analysis of Macrophages Isolated from db/db Mice and Selected miRNAs Involved in Metabolic Syndrome-Associated Cardiac Remodeling
Source: Int J Mol Sci. 2021 Feb 23;22(4):2197. doi: 10.3390/ijms22042197 (PMC7926522; doi:10.3390/ijms22042197)
Supplement: Supplementary file 1 [file ijms-22-02197-s001.xlsx]

## Sheet: Sheet1
Position	miRNA ID	Fold Change (comparing to control mouse LyC low)			Fold Change (comparing to db/db mouse LyC low)			Fold Change (comparing to control mouse LyC low)			Fold Change (comparing to control mouse LyC high)
		Control mouse LyC high			db/db mouse LyC high			db/db mouse LyC low			db/db mouse LyC high
		Fold Change	p-Value	Comments	Fold Change	p-Value	Comments	Fold Change	p-Value	Comments	Fold Change	p-Value	Comments
m1	mmu-let-7a-1-3p/mmu-let-7c-2-3p	0.72	0.573218	B	0.49	0.479328	B	0.53	0.281165	B	0.36	0.307698	B
m2	mmu-let-7a-2-3p	0.54	0.515535	B	1.64	0.275194	A	1.48	0.414171	B	4.57	0.0687924	A
m3	mmu-let-7a-5p	0.54	0.587312		1.11	0.841644		0.12	0.00338242		0.24	0.103063
m4	mmu-let-7b-3p	0.69	0.527767	B	1.06	0.958498	B	0.31	0.0965407	B	0.49	0.450086	B
m5	mmu-let-7b-5p	0.56	0.476469		0.94	0.883268		0.19	0.00463629		0.32	0.0883702
m6	mmu-let-7c-1-3p	0.29	0.26453	B	0.7	0.548206	B	1.24	0.740085	B	2.75	0.380605	B
m7	mmu-let-7c-5p	0.6	0.622796		1.13	0.791814		0.08	0.000841937		0.16	0.0352063
m8	mmu-let-7d-3p	0.92	0.873061		0.98	0.951088		0.69	0.426973		0.77	0.572534
m9	mmu-let-7d-5p	0.54	0.376373		1.24	0.564768	A	0.11	0.000626779	A	0.26	0.0364303
m10	mmu-let-7e-3p	0.02	0.173215	B	0.59	0.665185	B	0.42	0.409905	B	9.58	0.534078	B
m11	mmu-let-7e-5p	0.57	0.407568		1.23	0.603728	A	0.13	0.00165313	A	0.28	0.0300199
m12	mmu-let-7f-5p	0.55	0.63823		1.1	0.858649		0.09	0.00279746		0.18	0.0778183
m13	mmu-let-7g-3p	0.07	0.487235	B	1.22	0.852666	B	0.29	0.315085	B	4.88	0.744752	B
m14	mmu-let-7g-5p	0.57	0.465764		1.01	0.986777		0.09	0.000587814		0.16	0.0138166
m15	mmu-let-7i-3p	1.55	0.504794	B	1.25	0.630576	A	1.94	0.216806	B	1.7	0.351415	A
m16	mmu-let-7i-5p	0.57	0.593099		1.14	0.7831		0.09	0.00104736		0.18	0.0496485
m17	mmu-let-7j	0.95	0.929984	B	1.12	0.841005	B	0.68	0.481912	B	0.77	0.636922	B
m18	mmu-let-7k	0.66	0.682032	B	0.94	0.958513	B	0.64	0.677447	B	0.94	0.959973	B
m19	mmu-miR-100-3p	10.34	0.0101722	A	1.24	0.87337	B	1.04	0.973986	B	0.11	0.0118815	A
m20	mmu-miR-100-5p	2.08	0.185936		1.48	0.313698		1.18	0.688496		0.89	0.823811
m21	mmu-miR-101a-3p	0.6	0.472888		0.98	0.956007		0.21	0.00917847		0.35	0.0912538
m22	mmu-miR-101a-5p	2.25	0.366723	B	2.47	0.396074	B	0.53	0.566609	B	0.62	0.589872	B
m23	mmu-miR-101b-3p	0.6	0.379986		1.26	0.690271	B	0.15	0.0014523	A	0.31	0.0303254	A
m24	mmu-miR-101b-5p	0.4	0.10432	A	0.56	0.347983	B	0.59	0.222442	A	0.82	0.809625	B
m25	mmu-miR-101c	0.43	0.172019		0.95	0.943969	B	0.12	0.000364081	A	0.27	0.0223474	A
m26	mmu-miR-103-2-5p	2.39	0.27418	B	0.98	0.96716	A	3.88	0.017483	B	1.76	0.328227	A
m27	mmu-miR-103-3p	0.52	0.36544		0.83	0.624181		0.17	0.0035893		0.29	0.0454598
m28	mmu-miR-105	24.61	0.311178	B	7.38	0.773576	B	1	1	C	0.38	0.416129	B
m29	mmu-miR-106a-3p	2.19	0.20739	A	1.18	0.704757	A	1.92	0.183783	B	0.99	0.992195
m30	mmu-miR-106b-3p	5.91	0.104414	B	1.48	0.698599	B	2.41	0.470011	B	0.6	0.56045	B
m31	mmu-miR-106b-5p	0.8	0.824569	B	1	0.999834	B	1.53	0.571433	B	1.79	0.561727	B
m32	mmu-miR-107-3p	0.55	0.33194		0.83	0.627178		0.26	0.00951068		0.41	0.0791968
m33	mmu-miR-107-5p	0.38	0.315662	B	0.8	0.658031	B	1.53	0.351758	B	3.24	0.222152	B
m34	mmu-miR-10a-5p	0.79	0.67984		0.69	0.329402		0.88	0.769947		0.75	0.542485
m35	mmu-miR-10b-3p	3.68	0.0325714		1.29	0.532102		1.36	0.464032		0.49	0.20514
m36	mmu-miR-10b-5p	0.35	0.1781	B	1.05	0.958435	B	0.43	0.294759	B	1.29	0.802668	B
m37	mmu-miR-1188-3p	0.83	0.711504	A	1.21	0.677732	B	0.61	0.266845	A	0.88	0.801228	B
m38	mmu-miR-1188-5p	0.87	0.807519		0.85	0.692223		0.91	0.839812		0.9	0.832144
m39	mmu-miR-1190	1.49	0.436883	A	0.98	0.951047	A	1.7	0.219232	B	1.18	0.70764
m40	mmu-miR-1191b-3p	2.92	0.142734	A	0.28	0.118902	B	2.38	0.265923	B	0.23	0.0768189	A
m41	mmu-miR-1191b-5p	0.41	0.434411	B	0.48	0.502862	B	1.05	0.963673	B	1.07	0.950801	B
m42	mmu-miR-1192	1.85	0.640332	B	1.32	0.755129	B	3.94	0.264776	B	2.7	0.422596	B
m43	mmu-miR-1193-5p	0.04	0.320469	B	0.59	0.674146	B	0.63	0.694297	B	9.58	0.534078	B
m44	mmu-miR-1194	2.02	0.262637	B	2.18	0.0656993	A	1.36	0.586983	B	1.42	0.5516	A
m45	mmu-miR-1195	50.94	0.0958689	B	7.38	0.773576	B	1	1	C	0.19	0.130159	B
m46	mmu-miR-1198-3p	0.82	0.717889	B	0.66	0.327491	B	1.36	0.479479	B	1.05	0.933785	B
m47	mmu-miR-1198-5p	0.69	0.468715		0.71	0.485113	B	0.45	0.0768105	A	0.46	0.105012	A
m48	mmu-miR-1199-3p	0.54	0.22985		1	0.995371	B	0.4	0.0672771	A	0.72	0.492648	A
m49	mmu-miR-1199-5p	1.19	0.744206		0.95	0.902275		1.02	0.955643		0.82	0.678318
m50	mmu-miR-122-5p	0.95	0.932429	A	1.72	0.222196	A	1.09	0.845925	B	1.91	0.252353
m51	mmu-miR-1224-5p	0.91	0.855403		1.38	0.417473	A	0.47	0.0788031	A	0.7	0.411241
m52	mmu-miR-1231-5p	2.3	0.253944	B	1.43	0.710793	B	0.74	0.772504	B	0.49	0.364519	B
m53	mmu-miR-124-3p	0.63	0.408763	B	1.05	0.898578		1.04	0.923002	B	1.74	0.265731
m54	mmu-miR-124-5p	63.68	0.0523898	B	18.53	0.514744	B	1	1	C	0.39	0.327641	B
m55	mmu-miR-1247-3p	0.99	0.991052	B	0.97	0.953408	B	1.1	0.835711	B	1.08	0.890979	B
m56	mmu-miR-1247-5p	0.8	0.683817		0.83	0.656549		1.25	0.623044		1.27	0.626425
m57	mmu-miR-1249-3p	1.69	0.309629		1.03	0.944808		1.48	0.360355		0.9	0.819136
m58	mmu-miR-1249-5p	0.88	0.830623	B	1.5	0.659472	B	0.39	0.213514	B	0.69	0.633228	B
m59	mmu-miR-1251-3p	36.12	0.186738	B	4.88	0.870042	B	1	1	C	0.17	0.133013	B
m60	mmu-miR-1251-5p	1.51	0.423435	A	0.6	0.21646	B	1.57	0.296117	B	0.62	0.310694	A
m61	mmu-miR-1258-3p	0.69	0.479854		0.88	0.735499	B	0.68	0.383989	A	0.86	0.724242	A
m62	mmu-miR-1258-5p	0.87	0.817766		1.13	0.7788		0.82	0.674023		1.11	0.85665
m63	mmu-miR-125a-3p	0.94	0.897927		0.81	0.576481		0.99	0.974304		0.85	0.723941
m64	mmu-miR-125a-5p	0.57	0.52988		1.32	0.502147		0.08	0.000325799		0.19	0.0310466
m65	mmu-miR-125b-1-3p	0.62	0.551439	B	0.91	0.903454	B	0.79	0.729247	B	1.19	0.848207	B
m66	mmu-miR-125b-2-3p	0.95	0.912547		0.8	0.554968	A	1.05	0.902506	A	0.91	0.828059
m67	mmu-miR-125b-5p	0.51	0.443583		1.44	0.425624		0.11	0.00096223		0.31	0.0958074
m68	mmu-miR-1264-3p	326.26	0.00198228	A	8.63	0.728309	B	1	1	C	0.03	0.00339098	A
m69	mmu-miR-1264-5p	0.01	0.094046	B	0.45	0.534042	B	0.14	0.0912298	B	4.88	0.744752	B
m70	mmu-miR-126a-3p	0.7	0.681479		3.07	0.01462		0.08	0.000765042		0.34	0.123161
m71	mmu-miR-126a-5p	0.77	0.678026		3.13	0.0322271	A	0.1	0.000916385	A	0.41	0.122165
m72	mmu-miR-126b-3p	8.54	0.655156	B	1	1	C	1	1	C	0.12	0.701634	B
m73	mmu-miR-126b-5p	1.4	0.522356		1.22	0.600978		1.21	0.655749		1.07	0.891505
m74	mmu-miR-127-3p	1.12	0.825896	B	1.06	0.886697	A	1.42	0.416322	B	1.36	0.491793	A
m75	mmu-miR-128-1-5p	0.61	0.364508	B	0.94	0.897633	B	0.66	0.353707	B	0.98	0.981206	B
m76	mmu-miR-128-2-5p	0.47	0.308392		1.38	0.764131	B	0.08	0.00471629	A	0.25	0.108084	A
m77	mmu-miR-128-3p	1.35	0.582993		1.13	0.75212		1.16	0.725412		1.01	0.982902
m78	mmu-miR-129-1-3p	21.6	0.34787	B	4.88	0.870042	B	1	1	C	0.29	0.308745	B
m79	mmu-miR-129-5p	2.5	0.1322	A	0.93	0.862024	A	3.22	0.0110812	B	1.23	0.707363
m80	mmu-miR-1291	1.16	0.858187	B	1	0.999633	B	0.8	0.820356	B	0.73	0.72477	B
m81	mmu-miR-1298-3p	2.38	0.0952614	A	0.94	0.897821	A	2.13	0.131964	B	0.91	0.820992
m82	mmu-miR-1298-5p	2.63	0.0887679	A	1.23	0.648531		2.86	0.0269934	A	1.39	0.575168
m83	mmu-miR-129b-3p	1	0.999379	B	0.96	0.932697	B	1.74	0.456717	B	1.76	0.459217	B
m84	mmu-miR-129b-5p	30.7	0.253761	B	4.88	0.870042	B	1	1	C	0.21	0.190521	B
m85	mmu-miR-1306-3p	1.71	0.297975		1.44	0.345046		1.28	0.557103		1.15	0.781987
m86	mmu-miR-1306-5p	25.16	0.291102	B	6.14	0.819621	B	1	1	C	0.31	0.329677	B
m87	mmu-miR-130a-3p	2.46	0.161028		0.56	0.213957	B	0.83	0.657478	A	0.19	0.0214526	A
m88	mmu-miR-130b-3p	52.12	0.0892914	B	8.63	0.728309	B	1	1	C	0.22	0.160832	B
m89	mmu-miR-130b-5p	30.49	0.236673	B	6.14	0.819621	B	1	1	C	0.26	0.244199	B
m90	mmu-miR-130c	1.82	0.386787	B	1.68	0.593916	B	0.59	0.618952	B	0.57	0.456273	B
m91	mmu-miR-132-3p	1.8	0.250914	A	0.85	0.666554	A	1.84	0.16081	B	0.9	0.815954
m92	mmu-miR-133a-3p	1.03	0.960849		1.23	0.590151	A	0.43	0.0495786	A	0.52	0.15809
m93	mmu-miR-133a-5p	1.58	0.462101	B	0.9	0.79619	B	1.74	0.26403	B	1.01	0.979721	B
m94	mmu-miR-133b-3p	1.23	0.693183	B	1.59	0.328097	B	0.84	0.739312	B	1.09	0.849454	B
m95	mmu-miR-133b-5p	1.12	0.842567	B	1.09	0.828711	B	1.51	0.354125	B	1.53	0.371727	B
m96	mmu-miR-133c	1.35	0.545893		1.05	0.914755		1.95	0.11848		1.57	0.402536
m97	mmu-miR-134-3p	0.89	0.877803	B	1.22	0.840365	B	0.48	0.452977	B	0.69	0.6885	B
m98	mmu-miR-134-5p	0.68	0.48223	B	0.52	0.168133	B	1.08	0.857453	B	0.82	0.777401	B
m99	mmu-miR-135a-1-3p	0.89	0.844816	B	1.24	0.641803	B	0.93	0.896223	B	1.28	0.655205	B
m100	mmu-miR-135b-3p	0.84	0.727336		1.32	0.656912	A	0.85	0.769382	A	1.34	0.620954
m101	mmu-miR-135b-5p	2	0.479609	B	0.63	0.29849	B	4.54	0.0181466	B	1.53	0.544183	B
m102	mmu-miR-137-3p	1.56	0.443809		1.36	0.480108		1.18	0.719666		1.04	0.941157
m103	mmu-miR-137-5p	0.89	0.830887	B	0.99	0.983346	B	0.82	0.678086	B	0.89	0.837018	B
m104	mmu-miR-138-1-3p	3.16	0.249488	B	1.89	0.387068	B	2.42	0.449273	B	1.47	0.587991	B
m105	mmu-miR-138-2-3p	1.48	0.494639		1.11	0.799451		1.34	0.522914		1.01	0.981429
m106	mmu-miR-138-5p	0.75	0.592509		1.12	0.7767		0.83	0.676338		1.22	0.685789
m107	mmu-miR-139-3p	1.93	0.194881	A	1.89	0.100014	A	1.13	0.7917	B	1.15	0.753102
m108	mmu-miR-139-5p	1.2	0.734859	B	1.8	0.166242		0.8	0.682159	B	1.18	0.713606
m109	mmu-miR-140-3p	0.69	0.538555		1.65	0.196967		0.21	0.0045321		0.53	0.232902
m110	mmu-miR-140-5p	0.56	0.284706		1.23	0.580565	A	0.34	0.0355739	A	0.76	0.541468
m111	mmu-miR-141-3p	1.05	0.927775		1.05	0.901732	A	1.11	0.812677	A	1.13	0.784277
m112	mmu-miR-141-5p	0.97	0.964789	B	0.85	0.700985	B	1.49	0.42478	B	1.23	0.713519	B
m113	mmu-miR-142a-3p	0.6	0.678063		1.3	0.644726		0.11	0.00446937		0.24	0.122744
m114	mmu-miR-142a-5p	0.71	0.650878		1.79	0.188901		0.1	0.000902789		0.26	0.0522272
m115	mmu-miR-142b	0.77	0.667231		1.37	0.407086	A	0.21	0.00126485	A	0.37	0.0892499
m116	mmu-miR-143-3p	0.64	0.445197		1.52	0.276493		0.34	0.0245572		0.84	0.726014
m117	mmu-miR-143-5p	2.4	0.182729	A	0.73	0.74818	B	0.96	0.965405	B	0.32	0.13839	A
m118	mmu-miR-144-3p	12.38	0.527387	B	1	1	C	1	1	C	0.09	0.578873	B
m119	mmu-miR-144-5p	0.17	0.0230757	A	1.06	0.961975	B	0.11	0.0125483	A	0.65	0.716986	B
m120	mmu-miR-145a-5p	19.81	0.365876	B	6.14	0.819621	B	1	1	C	0.39	0.443758	B
m121	mmu-miR-145b	0.16	0.0214041	A	0.64	0.505288	B	0.53	0.147382	A	1.87	0.582659	B
m122	mmu-miR-146a-3p	1.01	0.984328	B	1.18	0.881092	B	0.32	0.232156	B	0.39	0.309468	B
m123	mmu-miR-146a-5p	0.41	0.485819		0.92	0.863934		0.04	0.000322041		0.1	0.0150514
m124	mmu-miR-146b-5p	0.5	0.26552		1.1	0.820844	B	0.13	0.000360894	A	0.29	0.0331347	A
m125	mmu-miR-147-5p	0.65	0.390377		0.81	0.579405		1.11	0.811236		1.33	0.520018
m126	mmu-miR-148a-3p	1.19	0.734013		1.32	0.465432	A	0.67	0.345531	A	0.76	0.53755
m127	mmu-miR-148a-5p	0.51	0.593178	B	1.07	0.951739	B	0.76	0.820048	B	1.44	0.77106	B
m128	mmu-miR-148b-3p	0.73	0.588445		1.58	0.269531	B	0.21	0.000946127	A	0.46	0.146304	A
m129	mmu-miR-149-3p	0.83	0.743223		0.88	0.756552		0.87	0.762674		0.9	0.840465
m130	mmu-miR-149-5p	1.4	0.551105		0.85	0.708825		1.71	0.250372		1.01	0.988236
m131	mmu-miR-150-3p	0.59	0.608144	B	0.62	0.551377	B	1.4	0.685007	B	1.42	0.747309	B
m132	mmu-miR-150-5p	0.73	0.568711		0.77	0.536697		1.33	0.534468		1.37	0.524668
m133	mmu-miR-151-3p	0.68	0.697797	B	1.06	0.960741	B	0.32	0.301974	B	0.51	0.571052	B
m134	mmu-miR-151-5p	1.16	0.870429	B	1.09	0.946028	B	0.35	0.327845	B	0.33	0.336472	B
m135	mmu-miR-152-3p	0.7	0.521616		0.8	0.575581	B	0.33	0.0160583	A	0.38	0.038801	A
m136	mmu-miR-152-5p	2.24	0.171831		1.51	0.32304		1.08	0.862388		0.76	0.619294
m137	mmu-miR-153-5p	0.67	0.431439	A	0.69	0.341313	B	1.1	0.816446	A	1.12	0.81937	B
m138	mmu-miR-154-3p	2.4	0.262212	B	0.91	0.820523	B	3.01	0.0820634	B	1.19	0.740556	B
m139	mmu-miR-154-5p	0.02	0.0660226	B	0.82	0.862764	B	0.31	0.179983	B	14.16	0.455267	B
m140	mmu-miR-155-5p	0.52	0.200885	A	0.16	0.00308712	A	2.46	0.123034		0.7	0.598429	B
m141	mmu-miR-15a-5p	0.61	0.442345		1.06	0.878532	A	0.3	0.0219681	A	0.52	0.240096
m142	mmu-miR-15b-5p	0.48	0.17381	A	1.01	0.994653	B	0.17	0.0029436	A	0.36	0.15855	B
m143	mmu-miR-16-2-3p	0.52	0.270976	A	0.71	0.758904	B	0.22	0.00662169	A	0.29	0.153847	B
m144	mmu-miR-16-5p	0.56	0.752314		1.01	0.992402		0.1	0.0100652		0.18	0.175051
m145	mmu-miR-1668	0.72	0.649864	B	11.85	0.619518	B	0.02	0.170483	B	0.38	0.343318	B
m146	mmu-miR-17-3p	0.55	0.391	B	0.81	0.817232	B	0.59	0.375654	B	0.88	0.900341	B
m147	mmu-miR-17-5p	1.77	0.268818	A	2.11	0.0876509	A	0.6	0.299401	B	0.77	0.552072
m148	mmu-miR-181a-1-3p	0.73	0.678781	B	0.74	0.819928	B	0.15	0.0626547	B	0.17	0.12811	B
m149	mmu-miR-181a-5p	0.65	0.48795		0.93	0.873127		0.44	0.0928311		0.64	0.416826
m150	mmu-miR-181b-1-3p	8.54	0.655156	B	6.14	0.819621	B	1	1	C	0.91	0.938689	B
m151	mmu-miR-181b-2-3p	36.98	0.180761	B	3.61	0.923845	B	1	1	C	0.12	0.083486	B
m152	mmu-miR-181b-5p	0.9	0.832171		1.09	0.82312	A	0.78	0.554052	A	0.94	0.886197
m153	mmu-miR-181c-3p	33.42	0.216738	B	8.63	0.728309	B	1	1	C	0.34	0.342128	B
m154	mmu-miR-181c-5p	2.15	0.130968	A	0.83	0.62506	B	1.69	0.224954	B	0.67	0.359025	A
m155	mmu-miR-181d-5p	0.7	0.61655	B	3.29	0.319375	B	0.12	0.0558732	B	0.61	0.601089	B
m156	mmu-miR-182-5p	1.68	0.310896	A	0.76	0.491001	B	1.43	0.412774	B	0.62	0.297521	A
m157	mmu-miR-183-5p	0.32	0.0878597	A	1.41	0.737579	B	0.14	0.0175979	A	0.65	0.631856	B
m158	mmu-miR-1839-3p	0.89	0.821978		0.66	0.262952		0.93	0.8662		0.72	0.457048
m159	mmu-miR-1839-5p	0.45	0.176419	A	0.84	0.870139	B	0.19	0.00990605	A	0.39	0.264834	B
m160	mmu-miR-184-3p	0.8	0.656789		2.16	0.0850414	A	0.73	0.455587	A	2.03	0.186603
m161	mmu-miR-184-5p	2.02	0.287083	B	0.67	0.298008	B	2.99	0.0270762	B	1.02	0.963725	B
m162	mmu-miR-1843a-3p	2.19	0.205339	B	0.8	0.631585	B	2.06	0.234584	B	0.77	0.608892	B
m163	mmu-miR-1843a-5p	0.94	0.953635	B	8.18	0.737187	B	0.05	0.460894	B	0.5	0.559972	B
m164	mmu-miR-1843b-3p	0.58	0.290351		0.99	0.969421		0.81	0.615034		1.42	0.445359
m165	mmu-miR-185-3p	0.55	0.247769		0.95	0.895303	A	0.61	0.256892	A	1.04	0.926753
m166	mmu-miR-185-5p	1	0.994895		1.19	0.668167	A	0.66	0.344675	A	0.81	0.644371
m167	mmu-miR-186-5p	0.57	0.30826	A	1.13	0.909205	B	0.22	0.00944897	A	0.48	0.402097	B
m168	mmu-miR-187-3p	0.64	0.393256		1.2	0.693823	B	0.39	0.0467785	A	0.79	0.6236	A
m169	mmu-miR-187-5p	0.4	0.0955112		0.38	0.0846908	B	0.52	0.268875	A	0.46	0.142452	A
m170	mmu-miR-188-3p	40.21	0.165569	B	7.38	0.773576	B	1	1	C	0.24	0.216354	B
m171	mmu-miR-188-5p	3.09	0.0716756		1.02	0.973835		3.72	0.0308486		1.27	0.728366
m172	mmu-miR-1892	31.63	0.234016	B	7.38	0.773576	B	1	1	C	0.3	0.303997	B
m173	mmu-miR-1893	1.76	0.340215		1.11	0.837313		1.74	0.267277		1.13	0.829882
m174	mmu-miR-1894-3p	2.3	0.229688		1.68	0.35273		1.26	0.648208		1	0.996019
m175	mmu-miR-1894-5p	0.65	0.396416		1.22	0.601894	A	0.77	0.540101	A	1.41	0.439203
m176	mmu-miR-1895	1.24	0.661384	A	0.62	0.369418	B	0.82	0.649731	B	0.4	0.0663521	A
m177	mmu-miR-1896	0.54	0.235458		0.98	0.952601	B	0.48	0.0934909	A	0.83	0.665999	A
m178	mmu-miR-1897-3p	1.51	0.495639	B	0.91	0.790828		2.57	0.0380042		1.56	0.340785	A
m179	mmu-miR-1897-5p	0.74	0.650496	B	0.86	0.75442	B	1.15	0.781518	B	1.3	0.694652	B
m180	mmu-miR-1898	0.99	0.980776		1.28	0.50896	A	0.79	0.576803	A	1.01	0.986671
m181	mmu-miR-1899	1.61	0.350252		0.74	0.422059		1.92	0.12862		0.89	0.795652
m182	mmu-miR-18a-5p	2.11	0.150474		0.95	0.89309		1.7	0.211865		0.79	0.624283
m183	mmu-miR-18b-5p	11.89	0.560131	B	8.63	0.728309	B	1	1	C	0.91	0.940746	B
m184	mmu-miR-1900	2.75	0.0657847		1.07	0.891261		3.19	0.0186932		1.27	0.689729
m185	mmu-miR-1901	0.93	0.895322		1.13	0.743921		0.9	0.795781		1.08	0.872278
m186	mmu-miR-1902	0.8	0.65411		1.01	0.987239	A	0.76	0.522501	A	0.98	0.965762
m187	mmu-miR-1903	1.17	0.760747		1.26	0.552812	A	0.71	0.421854	A	0.77	0.554343
m188	mmu-miR-1905	0.55	0.252605	A	1.8	0.1611	B	0.56	0.185295	A	1.85	0.212255	B
m189	mmu-miR-1906	0.65	0.403854		0.71	0.394213		1.06	0.899169		1.11	0.812731
m190	mmu-miR-190a-3p	2.64	0.211979	B	1.28	0.536433	A	2.95	0.0967877	B	1.52	0.374417	A
m191	mmu-miR-190a-5p	0.76	0.58133		0.92	0.923782	B	0.27	0.00758354	A	0.34	0.0733334	A
m192	mmu-miR-190b-5p	5.22	0.0759998	B	1.03	0.968464	B	4.16	0.214414	B	0.84	0.785398	B
m193	mmu-miR-191-5p	0.46	0.275083		1.04	0.910651		0.12	0.00110446		0.29	0.0329672
m194	mmu-miR-1912-3p	34.28	0.21763	B	13.59	0.578523	B	1	1	C	0.52	0.566974	B
m195	mmu-miR-192-3p	0.06	0.416995	B	0.22	0.233731	B	1.81	0.605137	B	6.08	0.678228	B
m196	mmu-miR-192-5p	0.81	0.676964		1.14	0.805682	B	0.49	0.106851	A	0.7	0.47662	A
m197	mmu-miR-1927	1.66	0.371239		1.71	0.180911	A	0.53	0.147145	A	0.54	0.230238
m198	mmu-miR-1928	20.03	0.00710939	B	1.06	0.94848	B	8.22	0.101508	B	0.49	0.318495	B
m199	mmu-miR-1929-5p	8.41	0.030844	B	0.9	0.886313	B	6.49	0.128771	B	0.71	0.581983	B
m200	mmu-miR-1930-3p	5.17	0.226055	B	1.09	0.94521	B	2.6	0.44222	B	0.51	0.60182	B
m201	mmu-miR-1930-5p	1.36	0.551347	A	1.3	0.500155	A	1.07	0.872245	B	1.06	0.889329
m202	mmu-miR-1932	1.98	0.256119	A	0.76	0.783766	B	0.55	0.497398	B	0.23	0.0491655	A
m203	mmu-miR-1933-5p	0.03	0.320882	B	1.04	0.974749	B	0.81	0.857382	B	22.55	0.304232	B
m204	mmu-miR-1934-3p	1.22	0.83868	B	1.15	0.891756	B	0.84	0.876698	B	0.83	0.849939	B
m205	mmu-miR-1934-5p	0.63	0.366516	A	1.69	0.38792	B	0.35	0.0468553	A	0.95	0.923377	B
m206	mmu-miR-1938	0.73	0.544106		1.11	0.783831	A	0.65	0.313153	A	1.01	0.975379
m207	mmu-miR-193a-3p	1.37	0.533045		1.08	0.839094		2.16	0.0742878		1.65	0.304329
m208	mmu-miR-193a-5p	0.04	0.30708	B	0.4	0.456615	B	0.93	0.943611	B	8.42	0.573184	B
m209	mmu-miR-193b-3p	2.07	0.267739	B	2.72	0.0445306	A	1.86	0.307881	B	2.62	0.0741214	A
m210	mmu-miR-194-1-3p	6.95	0.122984	B	0.45	0.440186	B	4.46	0.226294	B	0.27	0.284828	B
m211	mmu-miR-194-2-3p	18.02	0.398923	B	6.14	0.819621	B	1	1	C	0.43	0.491678	B
m212	mmu-miR-194-5p	2	0.300749	A	1.36	0.76497	B	0.28	0.132138	B	0.21	0.0560837	A
m213	mmu-miR-1940	1.06	0.920302	B	0.95	0.886904	A	1.84	0.160677	B	1.7	0.234412	A
m214	mmu-miR-1941-3p	1.47	0.699586	B	1.11	0.910918	B	1.2	0.877539	B	0.89	0.90802	B
m215	mmu-miR-1941-5p	0.81	0.673528		0.64	0.292019	B	0.95	0.896086		0.72	0.520792	B
m216	mmu-miR-1943-3p	1	0.995242		1.08	0.827772		1.31	0.519159		1.48	0.396983
m217	mmu-miR-1945	2.55	0.25432	B	1.43	0.557249	B	1.93	0.498278	B	1.05	0.94422	B
m218	mmu-miR-1947-3p	0.97	0.952361		0.71	0.418844	B	0.98	0.968866		0.7	0.459107	A
m219	mmu-miR-1947-5p	0.13	0.0279899	B	0.74	0.800687	B	0.28	0.0527964	B	1.39	0.791309	B
m220	mmu-miR-1948-3p	1.12	0.87707	B	0.94	0.880881	B	1.84	0.226335	B	1.54	0.431866	B
m221	mmu-miR-1949	11.41	0.00636276	A	1.15	0.857017	B	4.7	0.221141	B	0.54	0.277835	A
m222	mmu-miR-1950	5.95	0.0804459	B	0.75	0.689602	B	7.92	0.0440213	B	1.01	0.991202	B
m223	mmu-miR-1951	0.97	0.949755	B	0.6	0.275573	B	1.08	0.8682	B	0.65	0.449631	B
m224	mmu-miR-1953	1.11	0.850187	B	0.71	0.517411	B	1.14	0.793651	B	0.71	0.573267	B
m225	mmu-miR-1955-5p	1.26	0.647684		0.97	0.941467	A	1	0.992014	A	0.8	0.623343
m226	mmu-miR-1956	0.87	0.788932		1.2	0.704282	B	0.58	0.221506	A	0.78	0.599146
m227	mmu-miR-1957a	1.27	0.643864		1.32	0.470495		1.13	0.77926		1.19	0.716679
m228	mmu-miR-1957b	34.33	0.21067	B	8.63	0.728309	B	1	1	C	0.32	0.326327	B
m229	mmu-miR-1958	1.52	0.419036	A	1.06	0.891867	A	1.88	0.179894	B	1.39	0.462011
m230	mmu-miR-195a-3p	0.4	0.50112	B	7.66	0.0384062	B	2.1	0.547346	B	48.12	0.00750365	B
m231	mmu-miR-195a-5p	0.6	0.456331	B	1.39	0.729016	B	0.38	0.170902	B	0.89	0.901435	B
m232	mmu-miR-1961	0.05	0.33609	B	0.25	0.270549	B	1.21	0.867585	B	6.08	0.678228	B
m233	mmu-miR-1962	1.44	0.629172	B	1.39	0.750439	B	0.48	0.482902	B	0.49	0.41949	B
m234	mmu-miR-1963	1.92	0.220123	A	1.02	0.966322		2.42	0.043104	A	1.3	0.630817
m235	mmu-miR-1964-3p	0.99	0.989462	B	0.25	0.0842996	A	3.1	0.173632	A	0.69	0.661229	B
m236	mmu-miR-1964-5p	0.04	0.0036842	B	0.71	0.598009	B	0.68	0.43377	B	11.05	0.0653831	B
m237	mmu-miR-1966-3p	0.86	0.770058		1.22	0.599134	A	0.68	0.355091	A	0.94	0.894014
m238	mmu-miR-1966-5p	3.41	0.183154	B	0.52	0.356553	B	4.15	0.173054	B	0.62	0.504571	B
m239	mmu-miR-1967	1.28	0.636712		1.09	0.831611	B	1.15	0.76833	B	0.97	0.953436
m240	mmu-miR-1968-5p	0.57	0.556147	B	0.82	0.714584	B	1.19	0.752396	B	1.67	0.620517	B
m241	mmu-miR-1969	4.33	0.0405		1.13	0.862904		4.26	0.0410657		1.19	0.832187
m242	mmu-miR-196a-1-3p	0.63	0.524901	B	1.23	0.834848	B	0.31	0.19158	B	0.63	0.587807	B
m243	mmu-miR-196a-2-3p	1.75	0.405522	B	0.79	0.837811	B	0.55	0.549163	B	0.26	0.124043	B
m244	mmu-miR-196a-5p	0.7	0.547593	B	0.35	0.0336177		1.72	0.345685		0.93	0.922052	B
m245	mmu-miR-196b-3p	1.51	0.621462	B	0.66	0.626208	B	1.62	0.608571	B	0.7	0.684826	B
m246	mmu-miR-196b-5p	2.72	0.281431	B	1.75	0.585253	B	0.94	0.960803	B	0.59	0.50015	B
m247	mmu-miR-1970	0.64	0.64545	B	0.5	0.49015	B	1.1	0.918066	B	0.85	0.880794	B
m248	mmu-miR-1971	3.1	0.050178	A	1.71	0.162471	A	1.59	0.283961	B	0.92	0.877058
m249	mmu-miR-1981-3p	0.55	0.558946	B	1.48	0.490395	B	1.18	0.804108	B	3.16	0.200545	B
m250	mmu-miR-1981-5p	1.03	0.960325	B	0.76	0.634771	B	0.84	0.725778	B	0.63	0.441375	B
m251	mmu-miR-1982-5p	31.06	0.23445	B	6.14	0.819621	B	1	1	C	0.25	0.239515	B
m252	mmu-miR-199a-3p/mmu-miR-199b-3p	0.4	0.194268		1.33	0.445103	A	0.11	0.00110802	A	0.39	0.0810822
m253	mmu-miR-199a-5p	1.03	0.953715	A	1.28	0.531247		0.79	0.589407	B	1.01	0.982978
m254	mmu-miR-199b-5p	2.18	0.405184	B	2.98	0.312744	B	0.53	0.594435	B	0.7	0.658602	B
m255	mmu-miR-19a-3p	1.15	0.83532	B	0.96	0.934416	B	1.38	0.518352	B	1.17	0.780694	B
m256	mmu-miR-19b-2-5p	3.06	0.0490647		0.86	0.71774		3.37	0.0147909		0.98	0.973883
m257	mmu-miR-19b-3p	0.74	0.597348		0.75	0.48056		0.55	0.203395		0.58	0.250114
m258	mmu-miR-1a-3p	0.77	0.700159		1.93	0.0945042		0.16	0.00183975		0.41	0.149224
m259	mmu-miR-1b-3p	14.43	0.475769	B	6.14	0.819621	B	1	1	C	0.54	0.618418	B
m260	mmu-miR-1b-5p	0.61	0.371592		1.8	0.139063		0.53	0.15674		1.53	0.393564
m261	mmu-miR-200a-3p	0.86	0.812018	B	1.22	0.681413	B	0.95	0.927836	B	1.38	0.596054	B
m262	mmu-miR-200b-3p	0.72	0.515176	A	1.01	0.979959	B	0.56	0.272455	A	0.81	0.671594	B
m263	mmu-miR-200c-3p	3.38	0.248116	B	0.83	0.844924	B	2.83	0.398412	B	0.69	0.68198	B
m264	mmu-miR-200c-5p	3.51	0.0187013	A	0.91	0.821148		4.18	0.00258014	A	1.1	0.849794
m265	mmu-miR-201-3p	0.93	0.895928		1.5	0.344831		0.64	0.338136		1.03	0.957696
m266	mmu-miR-201-5p	1.83	0.551701	B	1.08	0.940243	B	1.11	0.930326	B	0.68	0.709091	B
m267	mmu-miR-202-3p	1.06	0.912635		1.91	0.0995315	A	0.58	0.210185	A	1.03	0.945007
m268	mmu-miR-203-3p	0.51	0.451081		0.85	0.813253		0.94	0.916876		1.56	0.546115
m269	mmu-miR-203-5p	2.53	0.0909613	A	2.08	0.0601593	A	1.64	0.25575	B	1.27	0.662816
m270	mmu-miR-204-3p	4.23	0.0434888		1.15	0.852179		5.07	0.022118		1.44	0.686942
m271	mmu-miR-204-5p	0.91	0.924589	B	0.91	0.941354	B	0.55	0.587197	B	0.54	0.581969	B
m272	mmu-miR-205-5p	0.56	0.352232		1.16	0.755799		0.83	0.709741		1.68	0.381817
m273	mmu-miR-206-3p	2.29	0.414556	B	0.92	0.950288	B	0.92	0.937773	B	0.37	0.365518	B
m274	mmu-miR-206-5p	0.21	0.10653	B	0.54	0.434477	B	0.87	0.788365	B	2.18	0.515653	B
m275	mmu-miR-208a-3p	1.17	0.860779	B	0.86	0.909904	B	0.47	0.510277	B	0.35	0.35234	B
m276	mmu-miR-208a-5p	2.33	0.186878	B	0.86	0.73186	A	3.26	0.0394312	B	1.26	0.622514	A
m277	mmu-miR-208b-3p	0.64	0.370346	A	1.27	0.528425	A	0.94	0.876987	A	1.84	0.176351	A
m278	mmu-miR-20a-3p	0.09	0.556748	B	0.32	0.358373	B	2	0.56125	B	7.25	0.622995	B
m279	mmu-miR-20a-5p	0.56	0.259715		1.23	0.676204	B	0.28	0.00888773	A	0.64	0.33806	A
m280	mmu-miR-20b-5p	39.93	0.166147	B	11.12	0.647612	B	1	1	C	0.37	0.371869	B
m281	mmu-miR-210-3p	1.83	0.240828		1.71	0.174413	A	0.83	0.664258	A	0.82	0.670122
m282	mmu-miR-210-5p	1.01	0.994217	B	0.75	0.81896	B	0.44	0.448452	B	0.34	0.342582	B
m283	mmu-miR-211-3p	3.71	0.030815	A	0.99	0.980659		5.94	0.00829481	A	1.66	0.462465
m284	mmu-miR-212-3p	1.09	0.863847	B	1.58	0.274179	A	1.03	0.944689	B	1.46	0.392137	A
m285	mmu-miR-212-5p	45.31	0.121928	B	12.36	0.611739	B	1	1	C	0.35	0.337025	B
m286	mmu-miR-2136	0.55	0.309935	A	0.79	0.765064	B	0.49	0.161197	A	0.72	0.682981	B
m287	mmu-miR-2137	0.77	0.66002		0.77	0.502707		0.63	0.328431		0.64	0.378446
m288	mmu-miR-2139	0.87	0.787539		1.08	0.843486	A	0.74	0.485396	A	0.9	0.801535
m289	mmu-miR-214-3p	2.84	0.0413212	A	0.88	0.771177		2.94	0.0271546	A	0.94	0.896814
m290	mmu-miR-215-5p	26.66	0.27539	B	9.88	0.686387	B	1	1	C	0.47	0.515759	B
m291	mmu-miR-216a-5p	2.31	0.203274		0.91	0.883064		3.16	0.0679556		1.31	0.704637
m292	mmu-miR-216b-3p	0.97	0.981295	B	2.19	0.499943	B	1.56	0.71899	B	3.26	0.360497	B
m293	mmu-miR-216c-3p	31.63	0.231008	B	16.07	0.54319	B	1	1	C	0.66	0.714024	B
m294	mmu-miR-217-5p	1.17	0.800345		0.85	0.742231		1.99	0.192797		1.39	0.582738
m295	mmu-miR-218-1-3p	1.55	0.419587	A	0.96	0.935182	A	1.47	0.447028	B	0.96	0.946114
m296	mmu-miR-218-2-3p	1.35	0.576293		1.11	0.78428		1.12	0.783331		0.93	0.885285
m297	mmu-miR-218-5p	2.97	0.119939	B	0.94	0.891198	B	2.86	0.170669	B	0.88	0.800709	B
m298	mmu-miR-2183	1.44	0.522946		0.82	0.63381		1.3	0.561247		0.73	0.55241
m299	mmu-miR-219a-1-3p	1.51	0.449282		0.95	0.895135	A	0.84	0.688397	A	0.53	0.22294
m300	mmu-miR-219a-5p	0.94	0.902807	B	1.43	0.517807	B	0.61	0.346803	B	0.96	0.939634	B
m301	mmu-miR-219b-5p	72.38	0.0285591	B	7.38	0.773576	B	1	1	C	0.13	0.044244	B
m302	mmu-miR-219c-5p	1.5	0.421916		1.08	0.852985	A	0.98	0.970261	A	0.75	0.520158
m303	mmu-miR-21a-3p	1.02	0.966303		0.6	0.180307	A	1	0.997667		0.61	0.268004	A
m304	mmu-miR-21a-5p	0.55	0.592574		1.09	0.883002		0.21	0.0235922		0.43	0.300971
m305	mmu-miR-22-3p	0.9	0.831444		1.26	0.776395	B	0.3	0.011925	A	0.42	0.102579	A
m306	mmu-miR-22-5p	60.17	0.0537003	B	9.88	0.686387	B	1	1	C	0.21	0.130306	B
m307	mmu-miR-221-3p	0.96	0.933629		1.33	0.444561	A	0.54	0.143324	A	0.75	0.551073
m308	mmu-miR-221-5p	0.03	0.198917	B	0.65	0.733583	B	0.28	0.255154	B	6.08	0.678228	B
m309	mmu-miR-222-3p	1.06	0.947117	B	1.32	0.816401	B	0.34	0.312215	B	0.44	0.430383	B
m310	mmu-miR-223-3p	0.68	0.751659		2.12	0.224405		0.1	0.0030944		0.32	0.222413
m311	mmu-miR-223-5p	0.81	0.67317		1.42	0.467398	B	0.45	0.0707744	A	0.81	0.664399	A
m312	mmu-miR-224-3p	24.48	0.308906	B	13.59	0.578523	B	1	1	C	0.73	0.785261	B
m313	mmu-miR-224-5p	17.5	0.42021	B	3.61	0.923845	B	1	1	C	0.26	0.276151	B
m314	mmu-miR-23a-3p	0.56	0.440571		0.97	0.942726		0.33	0.0382115		0.57	0.341069
m315	mmu-miR-23a-5p	0.65	0.679176	B	1.27	0.818156	B	0.58	0.618417	B	1.17	0.886414	B
m316	mmu-miR-23b-3p	0.76	0.640565		1.04	0.921028		0.59	0.257321		0.82	0.71152
m317	mmu-miR-23b-5p	1.29	0.621968		1.16	0.691684		0.97	0.948673		0.87	0.764773
m318	mmu-miR-24-1-5p	0.97	0.980559	B	2.05	0.480601	B	5.21	0.189026	B	11.49	0.0804039	B
m319	mmu-miR-24-2-5p	2.92	0.109387		1.01	0.993679		3.39	0.0502058		1.22	0.784303
m320	mmu-miR-24-3p	0.58	0.481785		1.27	0.589618		0.18	0.0055569		0.4	0.164227
m321	mmu-miR-25-3p	0.73	0.612928		1.03	0.946191	A	0.19	0.00341561	A	0.27	0.0225272
m322	mmu-miR-25-5p	0.79	0.631376		0.77	0.488111	B	0.8	0.59189	A	0.78	0.568875	A
m323	mmu-miR-26a-1-3p	0.97	0.970891	B	0.72	0.749707	B	0.89	0.903267	B	0.68	0.701856	B
m324	mmu-miR-26a-5p	0.57	0.598857		1	0.994466		0.11	0.0028635		0.21	0.0602719
m325	mmu-miR-26b-3p	1.07	0.907797	B	1.83	0.241709	B	0.65	0.507397	B	1.11	0.839479	B
m326	mmu-miR-26b-5p	0.54	0.520792		1.09	0.8561		0.11	0.00236439		0.23	0.054538
m327	mmu-miR-27a-3p	0.68	0.529369		1.12	0.785444		0.44	0.0902035		0.71	0.544052
m328	mmu-miR-27a-5p	0.85	0.816643	B	2.33	0.432912	B	0.23	0.137361	B	0.65	0.62423	B
m329	mmu-miR-27b-3p	0.74	0.664233		1.06	0.883066		0.27	0.0145392		0.39	0.136011
m330	mmu-miR-27b-5p	2.31	0.248691	B	2.48	0.352796	B	0.54	0.562848	B	0.62	0.527041	B
m331	mmu-miR-2861	0.85	0.761798		0.69	0.337819		0.82	0.647768		0.64	0.350643
m332	mmu-miR-28a-3p	0.64	0.425684	B	1.59	0.706241	B	0.2	0.0267199	B	0.5	0.476791	B
m333	mmu-miR-28a-5p	0.03	0.184958	B	0.75	0.823773	B	0.42	0.409566	B	10.73	0.510037	B
m334	mmu-miR-28b	0.07	0.491442	B	1.77	0.64035	B	0.7	0.75577	B	16.44	0.428141	B
m335	mmu-miR-28c	26.66	0.283041	B	4.88	0.870042	B	1	1	C	0.23	0.225062	B
m336	mmu-miR-290a-3p	1.46	0.454618	A	1.19	0.698517	B	0.86	0.750716	B	0.71	0.457132	A
m337	mmu-miR-290b-3p	32.78	0.233472	B	8.63	0.728309	B	1	1	C	0.35	0.365358	B
m338	mmu-miR-291a-3p	2.04	0.229824	B	0.86	0.758702	B	1.53	0.497976	B	0.67	0.448122	B
m339	mmu-miR-291b-5p	2.58	0.136708		0.86	0.821547		2.68	0.156147		0.98	0.973098
m340	mmu-miR-292a-3p	1.9	0.253379	A	0.94	0.903939	B	1.38	0.577977	B	0.69	0.532692	A
m341	mmu-miR-292a-5p	1.25	0.697439	B	0.36	0.0869901	B	2.6	0.135499	B	0.71	0.549029	B
m342	mmu-miR-292b-3p	0.16	0.17281	B	0.33	0.299263	B	2.13	0.471811	B	4	0.294921	B
m343	mmu-miR-293-3p	1.31	0.750499	B	0.6	0.608284	B	1.17	0.8671	B	0.55	0.533119	B
m344	mmu-miR-295-3p	0.52	0.196323	A	0.79	0.524589	A	0.83	0.651526	A	1.25	0.618177	A
m345	mmu-miR-295-5p	16.49	0.43553	B	4.88	0.870042	B	1	1	C	0.38	0.430622	B
m346	mmu-miR-296-3p	0.8	0.697216		0.7	0.392555		1.14	0.795713		1	0.998273
m347	mmu-miR-296-5p	1.62	0.357951		0.84	0.653004		2.13	0.0860606		1.13	0.813541
m348	mmu-miR-297a-5p	0.04	0.296365	B	0.26	0.287818	B	0.72	0.774484	B	4.88	0.744752	B
m349	mmu-miR-297b-5p	30.99	0.254644	B	13.59	0.578523	B	1	1	C	0.58	0.643886	B
m350	mmu-miR-298-5p	1.34	0.559871		1.27	0.569519		1.5	0.389318		1.5	0.392655
m351	mmu-miR-299a-5p	0.05	0.361774	B	0.23	0.265261	B	0.55	0.599565	B	2.39	0.921973	B
m352	mmu-miR-299b-3p	2.47	0.202372	B	0.84	0.689898		4.41	0.00576856	A	1.56	0.458841	A
m353	mmu-miR-299b-5p	1.03	0.976925	B	0.74	0.606408	B	2.56	0.191154	B	1.9	0.564121	B
m354	mmu-miR-29a-3p	0.5	0.419284		0.88	0.75889		0.1	0.000462212		0.18	0.0232977
m355	mmu-miR-29a-5p	0.51	0.611278	B	2.06	0.50533	B	1.08	0.950704	B	3.87	0.312051	B
m356	mmu-miR-29b-2-5p	0.99	0.993307	B	1.45	0.512267	B	1.3	0.753321	B	1.94	0.354937	B
m357	mmu-miR-29b-3p	0.58	0.487114		0.91	0.821647		0.1	0.000841362		0.16	0.0161951
m358	mmu-miR-29c-3p	0.75	0.617888		1.09	0.822116		0.38	0.0313378		0.56	0.233936
m359	mmu-miR-29c-5p	0.86	0.790542	B	1.56	0.390051	B	0.66	0.440244	B	1.22	0.722225	B
m360	mmu-miR-301a-3p	0.63	0.365554	A	0.69	0.505182	B	0.62	0.264203	A	0.69	0.57052	B
m361	mmu-miR-302b-3p	1.44	0.470378		1.38	0.410959	A	0.82	0.634114	A	0.79	0.584058
m362	mmu-miR-302b-5p	0.57	0.675207	B	0.2	0.184194	B	6.04	0.158693	B	2.02	0.583659	B
m363	mmu-miR-302d-3p	0.58	0.360397	B	1.45	0.434571	B	0.66	0.406061	B	1.59	0.429023	B
m364	mmu-miR-3057-3p	5.49	0.0301111	A	0.67	0.635599	B	1.2	0.830458	B	0.14	0.0314966	A
m365	mmu-miR-3057-5p	0.71	0.509354	B	1.14	0.723215	A	1.31	0.527481	B	2.1	0.101033	A
m366	mmu-miR-3058-3p	1.41	0.55789		1.52	0.317932		0.87	0.755407		0.96	0.940837
m367	mmu-miR-3058-5p	1.03	0.969814	B	1.2	0.879409	B	0.33	0.299276	B	0.39	0.373324	B
m368	mmu-miR-3059-3p	0.1	0.102109	B	1.14	0.894666	B	1.01	0.994147	B	10.62	0.0889689	B
m369	mmu-miR-3060-3p	0.27	0.0399507		1.51	0.272692	A	0.29	0.0296554	A	1.54	0.358347
m370	mmu-miR-3060-5p	1.4	0.611105	B	0.59	0.673168	B	0.41	0.361967	B	0.18	0.0563557	B
m371	mmu-miR-3061-3p	2.66	0.113367	A	1.8	0.146157	A	1.83	0.358467	B	1.28	0.576934
m372	mmu-miR-3061-5p	1.37	0.561639	A	1.37	0.461221	B	0.57	0.296885	B	0.57	0.195737	A
m373	mmu-miR-3062-5p	0.91	0.852447	B	0.87	0.719902	B	1.07	0.880883	B	1.04	0.92647	B
m374	mmu-miR-3063-3p	1.49	0.418622	A	0.75	0.485272	B	1.13	0.773199	B	0.58	0.224186	A
m375	mmu-miR-3063-5p	42	0.155575	B	4.88	0.870042	B	1	1	C	0.15	0.109379	B
m376	mmu-miR-3065-3p	0.68	0.495765		1.2	0.650644	B	0.28	0.0167915	A	0.47	0.100347	A
m377	mmu-miR-3065-5p	1.71	0.392077	B	0.98	0.953391	A	2.5	0.0547859	B	1.53	0.398135	A
m378	mmu-miR-3066-3p	6.23	0.00844931	A	1.3	0.49237	A	1.35	0.555179	B	0.28	0.0271043
m379	mmu-miR-3066-5p	0.86	0.760477		0.94	0.865736	A	1.06	0.894886	A	1.15	0.746891
m380	mmu-miR-3067-3p	0.25	0.040838		0.92	0.826986	B	0.12	0.00210898	A	0.44	0.0727854	A
m381	mmu-miR-3067-5p	1.8	0.316496		0.93	0.87913		2.31	0.0945989		1.22	0.728528
m382	mmu-miR-3068-3p	2.37	0.093706	A	1.15	0.717346		2.11	0.0846426	A	1.04	0.937264
m383	mmu-miR-3068-5p	0.74	0.685416	B	1.17	0.881759	B	0.31	0.200352	B	0.51	0.492513	B
m384	mmu-miR-3069-3p	1.85	0.389927	B	0.85	0.656512	A	3.31	0.0121908	B	1.53	0.377292	A
m385	mmu-miR-3069-5p	0.06	0.0185153	B	1.55	0.560626	B	0.62	0.508997	B	15.9	0.0388895	B
m386	mmu-miR-3070-2-3p	1.53	0.4418	B	1.04	0.913148	A	2.04	0.121446	B	1.46	0.39023	A
m387	mmu-miR-3070-3p	4.44	0.129323		1.06	0.952104		5.67	0.0628899		1.47	0.735474
m388	mmu-miR-3070-5p	38.48	0.174939	B	2.33	0.974896	B	1	1	C	0.07	0.0379087	B
m389	mmu-miR-3071-3p	0.4	0.50112	B	1.29	0.855078	B	0.83	0.882466	B	2.51	0.491426	B
m390	mmu-miR-3071-5p	0.78	0.619012	A	1.33	0.661181	B	0.39	0.0538968	A	0.68	0.476232	B
m391	mmu-miR-3072-3p	0.15	0.0876247	B	0.6	0.299467	B	1.56	0.352332	B	6	0.136456	B
m392	mmu-miR-3072-5p	0.99	0.984704		1.27	0.598876	B	0.3	0.0133972	A	0.38	0.0851189	A
m393	mmu-miR-3073a-5p	4.34	0.134503	B	2.4	0.314123	B	1.58	0.710107	B	0.89	0.86174	B
m394	mmu-miR-3073b-5p	0.56	0.468588		2.25	0.54006	B	0.03	0.00415664	A	0.11	0.00782315	A
m395	mmu-miR-3074-1-3p	0.9	0.902989	B	0.59	0.590808	B	1	0.996845	B	0.66	0.681818	B
m396	mmu-miR-3074-5p	1.17	0.762712	B	1.76	0.278301	B	0.56	0.299753	B	0.86	0.762491	B
m397	mmu-miR-3075-3p	0.02	0.117184	B	0.49	0.566533	B	0.32	0.267302	B	8.42	0.573184	B
m398	mmu-miR-3075-5p	0.04	0.343388	B	1.83	0.546941	B	0.73	0.792143	B	33.59	0.229659	B
m399	mmu-miR-3076-5p	2.13	0.157337		1.2	0.707544		3.11	0.0259926		1.82	0.300064
m400	mmu-miR-3077-3p	1.42	0.485327		0.81	0.570976		1.93	0.124753		1.09	0.844306
m401	mmu-miR-3077-5p	0.58	0.289358		1.24	0.577096	A	0.44	0.0568713	A	1.02	0.970602
m402	mmu-miR-3078-3p	1.19	0.784224	B	0.98	0.96126	B	1.34	0.595644	B	1.14	0.819603	B
m403	mmu-miR-3078-5p	2.75	0.208189	B	1.17	0.873079	B	1.17	0.887655	B	0.52	0.424816	B
m404	mmu-miR-3079-3p	0.04	0.266723	B	0.15	0.140198	B	0.99	0.996821	B	3.66	0.825669	B
m405	mmu-miR-3079-5p	0.73	0.551657		6.08	0.0210627		0.68	0.403836		5.91	0.0469649
m406	mmu-miR-3080-3p	2.37	0.120639	A	1.09	0.826536	A	1.43	0.443323	B	0.66	0.342962
m407	mmu-miR-3080-5p	1.27	0.635976		1.12	0.76983	A	1.08	0.863225	A	0.95	0.91383
m408	mmu-miR-3081-3p	36.4	0.183334	B	11.12	0.647612	B	1	1	C	0.39	0.404691	B
m409	mmu-miR-3081-5p	0.02	0.128079	B	0.22	0.180469	B	1.04	0.964121	B	9.58	0.534078	B
m410	mmu-miR-3082-5p	1.51	0.41777	A	0.58	0.15961	B	2.02	0.109125	B	0.75	0.527447	A
m411	mmu-miR-3084-3p	1.92	0.601544	B	2.22	0.287873	B	2.33	0.480532	B	2.8	0.296759	B
m412	mmu-miR-3084-5p	0.69	0.641617	B	0.94	0.954329	B	0.34	0.237278	B	0.49	0.505408	B
m413	mmu-miR-3085-5p	1.4	0.573525		1.09	0.847172		1.09	0.859129		0.88	0.816283
m414	mmu-miR-3086-3p	1.64	0.400022	B	1.09	0.827541	B	1.7	0.287128	B	1.12	0.803998	B
m415	mmu-miR-3086-5p	0.91	0.907147	B	1.05	0.952131	B	0.8	0.785267	B	0.94	0.940962	B
m416	mmu-miR-3087-3p	2.85	0.296275	B	1.26	0.766097	B	2.62	0.42773	B	1.12	0.881122	B
m417	mmu-miR-3088-3p	20.08	0.370259	B	4.88	0.870042	B	1	1	C	0.31	0.34077	B
m418	mmu-miR-3088-5p	0.76	0.649691	B	0.68	0.335869	B	1.65	0.252426	B	1.38	0.558296	B
m419	mmu-miR-3089-3p	0.82	0.72008		0.75	0.451277		1.15	0.753059		0.98	0.962584
m420	mmu-miR-3089-5p	0.76	0.592951		1.07	0.866632	A	0.85	0.702276	A	1.15	0.758355
m421	mmu-miR-3090-5p	8.65	0.0576001	B	1.38	0.659817	B	5.8	0.160811	B	0.99	0.991045	B
m422	mmu-miR-3091-3p	0.8	0.66303	B	0.93	0.869999		1.14	0.802108	B	1.3	0.581085
m423	mmu-miR-3091-5p	0.91	0.852548		0.93	0.863371	B	0.74	0.480878	A	0.76	0.534581	A
m424	mmu-miR-3092-3p	0.55	0.241917		0.54	0.201738	B	0.54	0.205928	A	0.55	0.256053	A
m425	mmu-miR-3092-5p	0.15	0.0525294	B	1.15	0.782151	B	0.92	0.866974	B	6.94	0.0723013	B
m426	mmu-miR-3093-3p	1.72	0.331478		1.73	0.196203		1.28	0.556338		1.3	0.63053
m427	mmu-miR-3093-5p	1.26	0.645193	A	1.1	0.798154	A	1.36	0.477421	B	1.16	0.733008
m428	mmu-miR-3094-5p	33.76	0.250803	B	2.33	0.974896	B	1	1	C	0.08	0.0563054	B
m429	mmu-miR-3095-3p	43.2	0.138879	B	13.59	0.578523	B	1	1	C	0.41	0.418923	B
m430	mmu-miR-3095-5p	1.03	0.977027	B	0.93	0.875452	B	2.83	0.0628555	B	2.86	0.231622	B
m431	mmu-miR-3097-3p	0.05	0.361697	B	0.47	0.550038	B	0.69	0.741585	B	6.08	0.678228	B
m432	mmu-miR-3097-5p	1.33	0.567394		1.39	0.461944		1.31	0.524797		1.39	0.528013
m433	mmu-miR-3098-5p	1.45	0.558243		1.17	0.879504	B	0.16	0.0133748	A	0.16	0.0167049	A
m434	mmu-miR-3099-3p	0.84	0.745306	B	0.71	0.505035	B	1.02	0.971818	B	0.83	0.748275	B
m435	mmu-miR-30a-3p	0.69	0.49976		1.14	0.900778	B	0.17	0.00202617	A	0.3	0.0947188
m436	mmu-miR-30a-5p	0.48	0.351726		0.96	0.925285		0.11	0.000432547		0.22	0.029782
m437	mmu-miR-30b-3p	2.28	0.282768	B	0.94	0.957356	B	0.66	0.702347	B	0.29	0.159145	B
m438	mmu-miR-30b-5p	0.96	0.965038	B	2.45	0.478044	B	0.17	0.109563	B	0.45	0.456627	B
m439	mmu-miR-30c-1-3p	0.65	0.403309	B	0.83	0.649297	B	0.93	0.865674	B	1.15	0.797647	B
m440	mmu-miR-30c-2-3p	30.77	0.24093	B	8.63	0.728309	B	1	1	C	0.36	0.375869	B
m441	mmu-miR-30c-5p	0.67	0.462783		0.85	0.695018	B	0.34	0.020575	A	0.44	0.129887	A
m442	mmu-miR-30d-3p	38.47	0.174975	B	3.61	0.923845	B	1	1	C	0.12	0.0748509	B
m443	mmu-miR-30d-5p	0.51	0.40681		1.13	0.783181		0.14	0.00227405		0.32	0.0655133
m444	mmu-miR-30e-3p	0.59	0.297798	A	1.13	0.834433	B	0.41	0.0485061	A	0.79	0.678106	B
m445	mmu-miR-30e-5p	0.67	0.580886		1.12	0.783144		0.17	0.0029336		0.29	0.0540749
m446	mmu-miR-30f	2.07	0.222816	B	0.92	0.829208	B	2.08	0.152886	B	0.92	0.8563	B
m447	mmu-miR-31-3p	2.93	0.0497508		1.52	0.325455		1.68	0.240607		0.93	0.890428
m448	mmu-miR-31-5p	3.6	0.0517946		0.83	0.758096		4.2	0.0149049		1	0.996758
m449	mmu-miR-3100-3p	1.03	0.977348	B	1.46	0.70663	B	0.67	0.712538	B	0.96	0.964469	B
m450	mmu-miR-3101-3p	0.91	0.847463	B	0.71	0.389607	B	1.17	0.718808	B	0.92	0.865459	B
m451	mmu-miR-3102-3p	1.49	0.478022		1.02	0.972445		1.72	0.295606		1.23	0.735435
m452	mmu-miR-3102-3p.2-3p	0.33	0.313022	B	0.55	0.548583	B	0.9	0.891808	B	1.4	0.785594	B
m453	mmu-miR-3102-5p	0.49	0.200382	A	1.1	0.839098	B	0.69	0.387583	A	1.5	0.512701	B
m454	mmu-miR-3103-3p	1.61	0.707879	B	1.03	0.976494	B	2.85	0.366507	B	1.71	0.653587	B
m455	mmu-miR-3103-5p	1.65	0.355504	A	1.22	0.612683	A	1.68	0.235382	B	1.27	0.610967
m456	mmu-miR-3104-3p	1.16	0.793164		1.52	0.263744	A	0.55	0.184387	A	0.75	0.573233
m457	mmu-miR-3104-5p	0.9	0.851961	B	0.82	0.617767	B	1.3	0.553019	B	1.13	0.818696	B
m458	mmu-miR-3105-5p	3.17	0.0516587		1.2	0.744335		3.17	0.0436646		1.23	0.740742
m459	mmu-miR-3106-5p	1.5	0.425171		1.18	0.658607		1.55	0.304025		1.26	0.630819
m460	mmu-miR-3108-3p	0.05	0.360772	B	0.64	0.688383	B	1.15	0.894797	B	14.16	0.455267	B
m461	mmu-miR-3108-5p	1.48	0.444763		0.92	0.827637		1.63	0.279972		0.99	0.988747
m462	mmu-miR-3109-3p	32.55	0.22091	B	7.38	0.773576	B	1	1	C	0.29	0.282034	B
m463	mmu-miR-3109-5p	0.01	0.0232115	A	0.4	0.476616	B	0.2	0.0460521	A	6.08	0.678228	B
m464	mmu-miR-3110-3p	1.17	0.757445		0.46	0.0392336		1.99	0.116538		0.77	0.544501
m465	mmu-miR-3112-3p	1.15	0.870728	B	0.44	0.432507	B	1.12	0.904855	B	0.44	0.432797	B
m466	mmu-miR-3113-3p	0.98	0.985333	B	2.34	0.445535	B	1.1	0.945868	B	2.32	0.503276	B
m467	mmu-miR-3113-5p	1.36	0.53965		1.38	0.419907	A	0.6	0.242424	A	0.65	0.339052
m468	mmu-miR-3154	1.69	0.353625		1.03	0.946691		1.39	0.458194		0.87	0.783966
m469	mmu-miR-32-5p	17.23	0.438898	B	4.88	0.870042	B	1	1	C	0.35	0.394044	B
m470	mmu-miR-320-3p	0.91	0.867831		1.04	0.926395		0.99	0.980458		1.14	0.809865
m471	mmu-miR-320-5p	1.18	0.762523		1.13	0.759234		0.95	0.897067		0.92	0.871035
m472	mmu-miR-322-3p	1.14	0.866145	B	0.42	0.378688	B	1.3	0.76018	B	0.48	0.437181	B
m473	mmu-miR-322-5p	0.63	0.488129		1.83	0.257046	B	0.08	0.000458736	A	0.24	0.0258809	A
m474	mmu-miR-323-5p	1.45	0.460946	A	0.71	0.371865	B	1.73	0.206632	B	0.83	0.675756	A
m475	mmu-miR-324-3p	5.48	0.0876255	B	0.66	0.739389	B	1.75	0.657182	B	0.21	0.119743	B
m476	mmu-miR-324-5p	0.49	0.16354	A	1.28	0.516982	A	0.56	0.180759	A	1.43	0.4213	A
m477	mmu-miR-325-3p	1.64	0.403927		1.04	0.93543		1.35	0.521694		0.88	0.819005
m478	mmu-miR-326-3p	0.87	0.80597		0.58	0.213238	B	0.47	0.0736465	A	0.3	0.0574261	A
m479	mmu-miR-326-5p	1.5	0.49119	B	0.8	0.560085	B	2.01	0.117	B	1.05	0.918587	B
m480	mmu-miR-327	1.06	0.914383	B	0.67	0.291644	B	1.95	0.125716	B	1.21	0.688455	B
m481	mmu-miR-328-3p	2.1	0.327497		0.59	0.173247		0.33	0.0254455		0.09	0.00616058
m482	mmu-miR-328-5p	2.68	0.153823		1.18	0.810027		3.41	0.0561177		1.57	0.587291
m483	mmu-miR-329-3p	49.77	0.105938	B	1	1	C	1	1	C	0.02	0.160958	B
m484	mmu-miR-33-3p	0.02	0.133767	B	0.83	0.885824	B	0.33	0.295998	B	11.88	0.489335	B
m485	mmu-miR-33-5p	33.76	0.209718	B	7.38	0.773576	B	1	1	C	0.28	0.267327	B
m486	mmu-miR-330-3p	1.73	0.518232	B	1.36	0.767893	B	0.59	0.614269	B	0.5	0.469624	B
m487	mmu-miR-330-5p	0.02	0.0753231	B	0.38	0.436297	B	0.36	0.250907	B	8.42	0.573184	B
m488	mmu-miR-331-3p	1.37	0.524739		0.92	0.833471	A	1.42	0.41762	A	0.98	0.956084
m489	mmu-miR-331-5p	1.65	0.357656		0.78	0.564928		2.61	0.0425617		1.27	0.672804
m490	mmu-miR-335-3p	19.81	0.365885	B	6.14	0.819621	B	1	1	C	0.39	0.44292	B
m491	mmu-miR-335-5p	31.34	0.266187	B	3.61	0.923845	B	1	1	C	0.14	0.124476	B
m492	mmu-miR-337-5p	3.02	0.0769344	A	1.92	0.146055	A	1.73	0.416065	B	1.21	0.705708
m493	mmu-miR-338-3p	1.03	0.966516	B	1.09	0.937459	B	0.4	0.360517	B	0.44	0.392888	B
m494	mmu-miR-338-5p	4.42	0.0479206		0.91	0.90435		5.48	0.0438319		1.2	0.843233
m495	mmu-miR-339-3p	0.97	0.952277	B	1.11	0.798807	B	0.95	0.899945	B	1.1	0.829951	B
m496	mmu-miR-339-5p	0.61	0.445014		1	0.994002	B	0.17	0.000818097	A	0.28	0.0360426	A
m497	mmu-miR-340-3p	5.81	0.0707974	B	2.08	0.535359	B	1.34	0.807845	B	0.47	0.34325	B
m498	mmu-miR-340-5p	0.64	0.427818		1.27	0.53641	A	0.24	0.00351303	A	0.48	0.11371
m499	mmu-miR-341-3p	0.96	0.9312		1.14	0.757691		1.15	0.74119		1.36	0.515708
m500	mmu-miR-341-5p	1.12	0.83146		0.83	0.610096		1.03	0.947256		0.79	0.59413
m501	mmu-miR-342-3p	0.46	0.297245		1.02	0.969383		0.2	0.00647833		0.46	0.18027
m502	mmu-miR-342-5p	0.43	0.218672	A	2.17	0.477834	B	0.12	0.0131667	A	0.62	0.61004	B
m503	mmu-miR-344-3p	1.07	0.917994	B	1.12	0.816859	B	1.19	0.74802	B	1.31	0.597197	B
m504	mmu-miR-344-5p	2.15	0.130184	A	0.88	0.75005	A	2.01	0.11305	B	0.84	0.683617
m505	mmu-miR-344b-3p	1.45	0.655941	B	0.92	0.934139	B	0.78	0.815608	B	0.52	0.484016	B
m506	mmu-miR-344b-5p	1.05	0.957016	B	1.77	0.557384	B	0.65	0.69079	B	1.16	0.87358	B
m507	mmu-miR-344c-3p	1.04	0.951026	B	1.05	0.90008	B	1.28	0.61713	B	1.27	0.652038	B
m508	mmu-miR-344c-5p	0.02	0.113574	B	0.69	0.750149	B	0.46	0.418871	B	15.3	0.440994	B
m509	mmu-miR-344d-2-5p	1.45	0.515465	B	0.76	0.457327		2.5	0.0387696		1.29	0.580698	A
m510	mmu-miR-344d-3-5p	2.45	0.0838703	A	1.03	0.936851		2.07	0.0917543	A	0.91	0.848826
m511	mmu-miR-344d-3p	42	0.151698	B	13.59	0.578523	B	1	1	C	0.43	0.441889	B
m512	mmu-miR-344f-3p	0.02	0.179806	B	1.03	0.976208	B	0.24	0.215745	B	10.73	0.510037	B
m513	mmu-miR-344g-3p	1.28	0.629508		1.01	0.975605		1.67	0.224343		1.35	0.526683
m514	mmu-miR-344g-5p	0.58	0.606587	B	1.02	0.968501	B	1.73	0.378501	B	2.85	0.276448	B
m515	mmu-miR-345-3p	2.16	0.152155		1.18	0.655821		1.28	0.564004		0.73	0.522638
m516	mmu-miR-345-5p	0.8	0.661181	A	0.73	0.407665	B	1.25	0.606382	A	1.19	0.717187	B
m517	mmu-miR-346-5p	70.52	0.0355498	B	17.3	0.52836	B	1	1	C	0.33	0.231353	B
m518	mmu-miR-3470b	1.54	0.571714	B	1.24	0.728273	B	1.11	0.89912	B	0.95	0.936474	B
m519	mmu-miR-3471	2.76	0.353354	B	1.5	0.738386	B	0.92	0.942585	B	0.55	0.574035	B
m520	mmu-miR-3472	0.45	0.49545	B	0.98	0.964033	B	2.23	0.318453	B	4.78	0.173737	B
m521	mmu-miR-3473c	1.18	0.748443	B	1.7	0.176934	A	0.97	0.952424	B	1.42	0.427386	A
m522	mmu-miR-3473d	1.13	0.808134		1.04	0.924243		1.42	0.407685		1.3	0.563114
m523	mmu-miR-3473e	0.04	0.32324	B	0.15	0.129708	B	2	0.53782	B	6.08	0.678228	B
m524	mmu-miR-3473g	1.59	0.449959	B	0.9	0.797849	B	2.15	0.114807	B	1.22	0.677124	B
m525	mmu-miR-3474	1.39	0.604244	B	1.14	0.733979	A	2.27	0.0732648	B	1.81	0.195198	A
m526	mmu-miR-3475-3p	0.31	0.160059		1.27	0.59265	B	0.84	0.707988		3.63	0.156734	B
m527	mmu-miR-3475-5p	0.63	0.657365	B	1.42	0.740411	B	0.57	0.597254	B	1.31	0.806853	B
m528	mmu-miR-34a-5p	0.51	0.277769		0.63	0.228398	B	0.2	0.00134637	A	0.24	0.00861673	A
m529	mmu-miR-34b-3p	0.03	0.000133109	A	0.63	0.497814	B	0.43	0.100313	A	9.32	0.0911479	B
m530	mmu-miR-34b-5p	1.18	0.871191	B	2.92	0.4078	B	0.19	0.186253	B	0.49	0.535324	B
m531	mmu-miR-34c-5p	0.21	0.0147241	A	0.56	0.172252	B	0.41	0.133268	A	1.03	0.959533	B
m532	mmu-miR-350-3p	1.08	0.88127	B	1.19	0.73863	B	0.7	0.485888	B	0.79	0.662845	B
m533	mmu-miR-350-5p	0.87	0.874657	B	0.72	0.787243	B	0.5	0.506807	B	0.43	0.433876	B
m534	mmu-miR-351-5p	0.56	0.238815	A	0.72	0.698417	B	0.31	0.0158409	A	0.39	0.165021	B
m535	mmu-miR-3544-3p	0.6	0.400216	A	0.65	0.680166	B	0.35	0.130418	A	0.41	0.32867	B
m536	mmu-miR-3544-5p	0.51	0.414636	B	0.76	0.805097	B	0.41	0.156523	B	0.58	0.645557	B
m537	mmu-miR-3547-3p	0.56	0.277597		0.48	0.399082		6.44	0.0397007		6.55	0.0230227
m538	mmu-miR-3547-5p	1.07	0.901732	B	1.46	0.3829	B	0.93	0.881577	B	1.28	0.615768	B
m539	mmu-miR-3552	0.01	0.0259392	B	0.37	0.363362	B	0.46	0.286079	B	13.02	0.471251	B
m540	mmu-miR-3569-3p	3.28	0.0600026		1.84	0.18181		1.23	0.652733		0.75	0.622176
m541	mmu-miR-3569-5p	0.55	0.25605		1.34	0.452114	A	0.42	0.0415872	A	1.02	0.956881
m542	mmu-miR-3572-3p	2.79	0.0757273	A	1.13	0.762464	A	3.03	0.0200259	B	1.24	0.645444
m543	mmu-miR-3572-5p	0.05	0.334821	B	1.46	0.7551	B	0.48	0.513625	B	15.3	0.440994	B
m544	mmu-miR-361-3p	0.58	0.311369		0.92	0.860344	B	0.25	0.00392112	A	0.4	0.0439129	A
m545	mmu-miR-361-5p	0.69	0.454797		1.36	0.50992	B	0.36	0.0244476	A	0.72	0.46641	A
m546	mmu-miR-3618-3p	1.74	0.4596	B	0.9	0.782259	B	2.65	0.0629852	B	1.39	0.53017	B
m547	mmu-miR-362-3p	1.2	0.720372	A	0.82	0.646946	B	0.89	0.775696	B	0.62	0.305879	A
m548	mmu-miR-362-5p	1.12	0.824144	B	0.74	0.557445	B	0.89	0.805253	B	0.61	0.358012	B
m549	mmu-miR-3620-3p	2.14	0.169154	A	0.77	0.556369		3.01	0.0340783	A	1.14	0.804274
m550	mmu-miR-3620-5p	0.26	0.108593	B	0.7	0.420505	B	1.23	0.623064	B	3.15	0.240007	B
m551	mmu-miR-363-5p	0.75	0.608909		0.76	0.459091		0.49	0.117823		0.5	0.151728
m552	mmu-miR-365-1-5p	31.98	0.23213	B	6.14	0.819621	B	1	1	C	0.24	0.225931	B
m553	mmu-miR-365-2-5p	14.2	0.0054381		1.03	0.96866	B	6.77	0.129741	B	0.52	0.270253
m554	mmu-miR-369-3p	1.43	0.784164	B	1.26	0.786101	B	3.42	0.312417	B	2.85	0.394045	B
m555	mmu-miR-369-5p	25.72	0.289483	B	4.88	0.870042	B	1	1	C	0.24	0.247156	B
m556	mmu-miR-370-3p	0.7	0.48502		1	0.998424		1.18	0.700293		1.61	0.308157
m557	mmu-miR-370-5p	43.23	0.144842	B	4.88	0.870042	B	1	1	C	0.14	0.0973146	B
m558	mmu-miR-374b-3p	8.08	0.0100277		0.62	0.204072		1.83	0.187693		0.14	0.014485
m559	mmu-miR-374b-5p	2.84	0.178006	B	0.92	0.940268	B	0.88	0.909368	B	0.29	0.169191	B
m560	mmu-miR-374c-5p	2.09	0.397604	B	2.36	0.399872	B	0.6	0.636722	B	0.71	0.697805	B
m561	mmu-miR-375-3p	1.51	0.445315		1.25	0.561029		1.12	0.792276		0.93	0.884726
m562	mmu-miR-375-5p	2.45	0.108406	A	1.12	0.793813	B	1.69	0.393029	B	0.78	0.59072	A
m563	mmu-miR-376a-3p	45.89	0.119316	B	8.63	0.728309	B	1	1	C	0.24	0.200798	B
m564	mmu-miR-376b-3p	0.18	0.807445	B	0.42	0.478883	B	5.27	0.193227	B	12.16	0.489941	B
m565	mmu-miR-376c-3p	34.63	0.203903	B	12.36	0.611739	B	1	1	C	0.46	0.493816	B
m566	mmu-miR-378a-3p	0.73	0.598672		1.1	0.830181	B	0.27	0.0129146	A	0.42	0.0955024	A
m567	mmu-miR-378a-5p	1.72	0.601187	B	0.49	0.489134	B	2.04	0.5449	B	0.56	0.572104	B
m568	mmu-miR-378b	0.94	0.909982	B	1.01	0.98201	B	1.01	0.989647	B	1.09	0.84878	B
m569	mmu-miR-378c	41.13	0.150904	B	9.88	0.686387	B	1	1	C	0.31	0.297979	B
m570	mmu-miR-378d	1.26	0.725032	B	0.99	0.98657	B	1.21	0.74978	B	0.99	0.9937	B
m571	mmu-miR-379-3p	56.77	0.0539958	B	1.25	0.798593	B	23.16	0.269734	B	0.64	0.538928	B
m572	mmu-miR-379-5p	2.23	0.129709		1.42	0.390533		1.26	0.58375		0.85	0.738279
m573	mmu-miR-380-5p	0.79	0.680011	B	1.42	0.441577	B	0.72	0.50202	B	1.24	0.674592	B
m574	mmu-miR-381-3p	1.3	0.611928	A	0.63	0.225002	B	1.71	0.211368	B	0.86	0.733174	A
m575	mmu-miR-381-5p	1.2	0.784336	B	0.53	0.535234	B	0.85	0.857001	B	0.39	0.282497	B
m576	mmu-miR-382-3p	1.45	0.458882	A	1.33	0.450563	A	1.24	0.618304	B	1.18	0.711631
m577	mmu-miR-382-5p	1.32	0.585187	A	1.12	0.775939	B	1.05	0.905928	B	0.89	0.796754	A
m578	mmu-miR-383-3p	2.36	0.180166	B	0.58	0.156681	B	3.47	0.011249	B	0.9	0.82938	B
m579	mmu-miR-384-3p	0.02	0.15331	B	2.34	0.503772	B	0.09	0.0554168	B	9.58	0.534078	B
m580	mmu-miR-3960	0.79	0.646485		0.92	0.833795		1.27	0.587482		1.45	0.422332
m581	mmu-miR-3961	1.39	0.512353		0.99	0.976103	A	1.12	0.796755	A	0.78	0.584556
m582	mmu-miR-3963	0.94	0.925392		0.94	0.882976		0.31	0.0306074		0.32	0.0689748
m583	mmu-miR-3965	0.23	0.133297	B	0.73	0.529207	B	1.05	0.915248	B	3.05	0.315997	B
m584	mmu-miR-3966	5.31	0.0308813		2.59	0.146761		2.13	0.134947		0.95	0.952537
m585	mmu-miR-3968	0.93	0.886356		0.83	0.623172		0.79	0.574353		0.7	0.454946
m586	mmu-miR-3970	184.97	0.00283116	A	4.88	0.870042	B	1	1	C	0.03	0.00178572	A
m587	mmu-miR-3971	1.26	0.669918		1.05	0.909762		1.59	0.314507		1.35	0.57498
m588	mmu-miR-409-3p	15.97	0.43932	B	2.33	0.974896	B	1	1	C	0.17	0.174918	B
m589	mmu-miR-410-5p	0.49	0.501914	B	1.1	0.926574	B	0.63	0.679694	B	1.37	0.776289	B
m590	mmu-miR-411-3p	0.82	0.69435		0.62	0.225014	B	0.93	0.870233	A	0.7	0.443888	A
m591	mmu-miR-411-5p	24.61	0.305103	B	3.61	0.923845	B	1	1	C	0.18	0.170441	B
m592	mmu-miR-412-3p	0.25	0.0224267	A	1.24	0.61889	A	0.73	0.553205	A	3.49	0.0192944	A
m593	mmu-miR-421-3p	0.51	0.611278	B	1.58	0.624813	B	1.91	0.592182	B	5.49	0.191814	B
m594	mmu-miR-423-3p	3.11	0.101115		0.97	0.965385		3.52	0.062061		1.16	0.842955
m595	mmu-miR-423-5p	0.53	0.215395		1.18	0.734712	B	0.26	0.00415355	A	0.59	0.25878	A
m596	mmu-miR-425-3p	2.03	0.170691		1.31	0.551802		1.98	0.119035		1.32	0.607501
m597	mmu-miR-425-5p	0.62	0.356346		1.19	0.7416	B	0.26	0.00593564	A	0.52	0.207762	A
m598	mmu-miR-429-3p	0.95	0.915579	B	1.34	0.452072	A	0.9	0.813305	B	1.31	0.54923	A
m599	mmu-miR-429-5p	1.6	0.380722	A	1.11	0.845813	B	0.8	0.69858	B	0.57	0.246864	A
m600	mmu-miR-431-3p	0.88	0.877685	B	1.31	0.787991	B	0.35	0.291235	B	0.56	0.556066	B
m601	mmu-miR-431-5p	2.04	0.381345	B	1.45	0.531946	B	1.36	0.755447	B	0.96	0.953485	B
m602	mmu-miR-432	1.14	0.844305	B	0.67	0.67845	B	0.84	0.836877	B	0.5	0.417101	B
m603	mmu-miR-433-3p	0.03	0.201937	B	0.77	0.835815	B	0.45	0.447912	B	11.88	0.489335	B
m604	mmu-miR-433-5p	17.01	0.436942	B	8.63	0.728309	B	1	1	C	0.66	0.734584	B
m605	mmu-miR-434-3p	1.91	0.200813	A	0.6	0.204084	B	1.9	0.15726	B	0.6	0.239893	A
m606	mmu-miR-434-5p	2.29	0.338326	B	0.68	0.74096	B	1.02	0.984767	B	0.31	0.220438	B
m607	mmu-miR-448-3p	25.71	0.285839	B	4.88	0.870042	B	1	1	C	0.24	0.246276	B
m608	mmu-miR-449a-5p	1.06	0.923291	B	1.27	0.613258	B	1	0.997949	B	1.24	0.702715	B
m609	mmu-miR-449b	0.03	0.214791	B	0.32	0.358373	B	0.68	0.71906	B	7.25	0.622995	B
m610	mmu-miR-449c-3p	2.6	0.0857299		1.2	0.718202		2.81	0.0662585		1.36	0.569817
m611	mmu-miR-450a-1-3p	0.59	0.30849	A	0.81	0.79691	B	0.43	0.0697993	A	0.59	0.468987	B
m612	mmu-miR-450a-2-3p	0.71	0.631071	B	0.69	0.706079	B	0.63	0.540146	B	0.64	0.646881	B
m613	mmu-miR-450b-5p	1.73	0.56824	B	2.35	0.422172	B	0.76	0.820048	B	0.98	0.982314	B
m614	mmu-miR-451a	0.8	0.822925	B	2.02	0.569807	B	0.29	0.264949	B	0.77	0.813716	B
m615	mmu-miR-451b	1.66	0.365082		0.81	0.61539		2.54	0.0450362		1.25	0.697789
m616	mmu-miR-452-3p	0.03	0.170514	B	0.28	0.277559	B	0.84	0.855298	B	8.42	0.573184	B
m617	mmu-miR-452-5p	0.12	0.108295	B	0.52	0.612404	B	0.43	0.474016	B	1.87	0.613963	B
m618	mmu-miR-453	0.99	0.995826	B	3.92	0.217251	B	0.34	0.346618	B	1.42	0.736181	B
m619	mmu-miR-455-3p	0.74	0.715839	B	0.96	0.978887	B	0.29	0.247995	B	0.39	0.400227	B
m620	mmu-miR-455-5p	0.94	0.911419	B	0.61	0.35474	B	1.05	0.912263	B	0.7	0.595132	B
m621	mmu-miR-463-3p	0.87	0.801404		1.7	0.177942	A	0.54	0.18166	A	1.04	0.940245
m622	mmu-miR-465a-3p/mmu-miR-465b-3p/mmu-miR-465c-3p	4.89	0.829798	B	1	1	C	1	1	C	0.22	0.858395	B
m623	mmu-miR-465a-5p	0.02	0.0674404	B	1.11	0.9218	B	0.06	0.0130951	B	3.66	0.825669	B
m624	mmu-miR-465c-5p	16.49	0.458656	B	8.63	0.728309	B	1	1	C	0.68	0.752447	B
m625	mmu-miR-465d-3p	29.28	0.248288	B	3.61	0.923845	B	1	1	C	0.15	0.13339	B
m626	mmu-miR-466d-3p	1.82	0.333745	A	0.81	0.735302	B	0.59	0.30033	B	0.25	0.0378448	A
m627	mmu-miR-466g	47.94	0.119072	B	3.61	0.923845	B	1	1	C	0.1	0.0480626	B
m628	mmu-miR-466i-3p	0.93	0.905039	B	0.52	0.163813	B	1.47	0.389638	B	0.83	0.784543	B
m629	mmu-miR-466l-3p	0.02	0.192694	B	1.11	0.9218	B	0.07	0.0516104	B	3.66	0.825669	B
m630	mmu-miR-466m-3p	17.01	0.455188	B	3.61	0.923845	B	1	1	C	0.27	0.298354	B
m631	mmu-miR-466n-3p	0.52	0.200153		1.71	0.156644	A	0.55	0.166307	A	1.81	0.202006
m632	mmu-miR-466q	49.48	0.118528	B	4.88	0.870042	B	1	1	C	0.12	0.0773626	B
m633	mmu-miR-467a-3p	27.12	0.31438	B	2.33	0.974896	B	1	1	C	0.11	0.083983	B
m634	mmu-miR-467b-3p	1.47	0.734665	B	0.89	0.914806	B	1.95	0.572923	B	1.13	0.913636	B
m635	mmu-miR-467c-5p	5.76	0.115372	B	1.37	0.659357	B	5.74	0.122253	B	1.46	0.647979	B
m636	mmu-miR-467g	44.05	0.172604	B	6.14	0.819621	B	1	1	C	0.19	0.166129	B
m637	mmu-miR-468-3p	0.9	0.840194		0.62	0.292699		1.5	0.407581		1.08	0.880569
m638	mmu-miR-468-5p	1.28	0.619361	A	1.92	0.111999	A	0.72	0.47439	B	1.07	0.875686
m639	mmu-miR-470-5p	2.08	0.171457	A	0.95	0.891411		3.16	0.00997359	A	1.49	0.408076
m640	mmu-miR-483-3p	3.57	0.0399608		1.29	0.707994		3.7	0.0559348		1.39	0.643434
m641	mmu-miR-483-5p	1.6	0.448318	B	0.73	0.422065	B	2.42	0.0581478	B	1.09	0.866852	B
m642	mmu-miR-484	1.13	0.802608		0.7	0.331926		1.49	0.345235		0.93	0.865091
m643	mmu-miR-485-3p	58.64	0.063566	B	12.36	0.611739	B	1	1	C	0.28	0.208673	B
m644	mmu-miR-485-5p	43.24	0.134665	B	9.88	0.686387	B	1	1	C	0.29	0.267449	B
m645	mmu-miR-486a-3p	1.59	0.520366	B	0.95	0.959375	B	0.64	0.66517	B	0.39	0.281657	B
m646	mmu-miR-486a-5p	0.56	0.538196	B	0.56	0.595212	B	0.8	0.815138	B	0.8	0.85072	B
m647	mmu-miR-486b-3p	21.06	0.352898	B	6.14	0.819621	B	1	1	C	0.37	0.408877	B
m648	mmu-miR-486b-5p	0.54	0.243772		0.76	0.472553	A	0.55	0.154217	A	0.77	0.547967
m649	mmu-miR-487b-3p	2.69	0.113889	A	0.87	0.765562	B	1.88	0.308486	B	0.65	0.372971	A
m650	mmu-miR-487b-5p	1.72	0.288599		1.32	0.464054	A	0.92	0.85057	A	0.72	0.471273
m651	mmu-miR-488-5p	1.3	0.751127	B	1.12	0.909328	B	0.7	0.736539	B	0.62	0.604444	B
m652	mmu-miR-489-3p	0.05	0.344723	B	0.48	0.5732	B	0.51	0.551582	B	4.88	0.744752	B
m653	mmu-miR-489-5p	0.03	0.242618	B	0.16	0.132054	B	1.44	0.722672	B	6.08	0.678228	B
m654	mmu-miR-490-3p	47.99	0.117759	B	4.88	0.870042	B	1	1	C	0.13	0.0765168	B
m655	mmu-miR-490-5p	37.27	0.214813	B	8.63	0.728309	B	1	1	C	0.3	0.318412	B
m656	mmu-miR-491-3p	1.04	0.937724		1.37	0.416576	A	0.56	0.204068	A	0.8	0.617121
m657	mmu-miR-491-5p	0.82	0.824109	B	1.12	0.899467	B	0.84	0.853025	B	1.12	0.90221	B
m658	mmu-miR-493-3p	35.55	0.193324	B	4.88	0.870042	B	1	1	C	0.17	0.134717	B
m659	mmu-miR-493-5p	29.57	0.281757	B	14.83	0.559455	B	1	1	C	0.66	0.725133	B
m660	mmu-miR-494-3p	30.21	0.24383	B	4.88	0.870042	B	1	1	C	0.2	0.183603	B
m661	mmu-miR-496a-3p	1.59	0.556478	B	0.66	0.625866	B	1.54	0.641445	B	0.63	0.580041	B
m662	mmu-miR-496b	1.12	0.823925	B	1.11	0.817134	B	0.88	0.779145	B	0.89	0.800803	B
m663	mmu-miR-497a-3p	0.02	0.0988222	B	0.53	0.604186	B	0.42	0.33226	B	10.73	0.510037	B
m664	mmu-miR-497a-5p	0.82	0.842836	B	0.73	0.795164	B	0.67	0.708167	B	0.61	0.664254	B
m665	mmu-miR-497b	1.34	0.764248	B	1.25	0.837078	B	0.69	0.737114	B	0.68	0.714497	B
m666	mmu-miR-499-3p	0.03	0.148982	B	0.62	0.697351	B	0.44	0.409126	B	10.73	0.510037	B
m667	mmu-miR-499-5p	2.47	0.111632	A	1.12	0.773059	B	1.95	0.218611	B	0.91	0.834606	A
m668	mmu-miR-500-3p	0.36	0.396835	B	1.53	0.653167	B	0.66	0.701651	B	2.58	0.448243	B
m669	mmu-miR-500-5p	1.04	0.943193	B	0.81	0.572254	B	1.77	0.18662	B	1.43	0.454538	B
m670	mmu-miR-501-3p	0.79	0.646394		1.22	0.719471	B	0.31	0.0248101	A	0.49	0.122633	A
m671	mmu-miR-501-5p	0.46	0.127856		2.15	0.485611	B	0.08	2.41653e-05	A	0.35	0.0828612	A
m672	mmu-miR-503-3p	1.55	0.379004	A	0.93	0.868222	B	0.93	0.873215	B	0.56	0.183611	A
m673	mmu-miR-503-5p	0.66	0.40902	A	0.68	0.67865	B	0.37	0.0258884	A	0.37	0.21138	B
m674	mmu-miR-504-3p	2.52	0.134376		0.95	0.920652		2.44	0.102579		0.98	0.981733
m675	mmu-miR-5046	2.35	0.51053	B	1.45	0.620917	B	4.08	0.239459	B	2.45	0.42032	B
m676	mmu-miR-505-5p	1.13	0.891995	B	0.64	0.717473	B	0.64	0.684695	B	0.37	0.369422	B
m677	mmu-miR-509-3p	1.01	0.991494	B	0.95	0.893014	B	1.38	0.48434	B	1.38	0.541447	B
m678	mmu-miR-5098	0.39	0.153479	A	1.56	0.711427	B	0.1	0.00435581	A	0.41	0.406053	B
m679	mmu-miR-5099	1.38	0.689183	B	1.35	0.801156	B	0.44	0.444132	B	0.43	0.385831	B
m680	mmu-miR-5100	1.72	0.555233	B	0.53	0.444989	B	2.85	0.294473	B	0.81	0.812799	B
m681	mmu-miR-5101	3	0.243369	B	1.87	0.535012	B	1	0.996598	B	0.65	0.628203	B
m682	mmu-miR-5103	21.32	0.342405	B	8.63	0.728309	B	1	1	C	0.52	0.576431	B
m683	mmu-miR-5104	3.42	0.170631	B	1.27	0.839769	B	0.86	0.892923	B	0.34	0.232917	B
m684	mmu-miR-5106	1.34	0.655183		1.06	0.912211		0.91	0.845588		0.71	0.567526
m685	mmu-miR-5107-3p	3.51	0.0675258		1.14	0.830925		4.04	0.0263829		1.37	0.681726
m686	mmu-miR-5107-5p	1.04	0.941887		0.83	0.687888	B	0.65	0.327132	A	0.51	0.148054	A
m687	mmu-miR-5108	1.95	0.234339		1.73	0.173084		1.05	0.90168		0.96	0.945631
m688	mmu-miR-511-3p	1.05	0.924394		1	0.995221	B	0.72	0.439584	A	0.69	0.415047	A
m689	mmu-miR-511-5p	2.78	0.132829	A	0.71	0.742206	B	0.71	0.717578	B	0.19	0.0366824	A
m690	mmu-miR-5110	1.07	0.895383		0.99	0.975047		1.19	0.69354		1.09	0.858993
m691	mmu-miR-5112	1.49	0.422994		1.23	0.596301	A	1.02	0.962149	A	0.9	0.805628
m692	mmu-miR-5113	0.03	0.244967	B	0.37	0.417152	B	0.79	0.824901	B	8.42	0.573184	B
m693	mmu-miR-5114	0.2	0.0890496	B	1	0.996669	B	0.85	0.734217	B	3.89	0.194669	B
m694	mmu-miR-5116	1.08	0.885647	B	0.69	0.368162	B	1.51	0.381351	B	0.94	0.899915	B
m695	mmu-miR-5118	1.41	0.491542	A	0.93	0.852512		1.28	0.560969	B	0.88	0.76706
m696	mmu-miR-5119	1.7	0.385901		1.11	0.828249		1.44	0.461501		0.97	0.953564
m697	mmu-miR-5120	0.82	0.699501		0.67	0.288944	B	0.75	0.502063	A	0.61	0.257885	A
m698	mmu-miR-5121	1.83	0.247126		1.41	0.407605		1.4	0.427499		1.09	0.871478
m699	mmu-miR-5122	1.88	0.251242		0.94	0.87583		1.37	0.454564		0.68	0.460926
m700	mmu-miR-5124a	1.06	0.901308		1.06	0.868663	A	1.09	0.84369	A	1.09	0.844233
m701	mmu-miR-5125	0.69	0.504125		1.17	0.677478	A	0.39	0.0480411	A	0.71	0.459479
m702	mmu-miR-5126	0.89	0.841618		0.93	0.852319		0.52	0.135163		0.53	0.198803
m703	mmu-miR-5127	1.47	0.583566	B	1.3	0.794637	B	0.56	0.540737	B	0.52	0.450433	B
m704	mmu-miR-5128	1.45	0.508791	B	0.77	0.532169	B	1.63	0.287667	B	0.9	0.8381	B
m705	mmu-miR-5129-5p	3.2	0.0351093	A	1	0.999272		3.79	0.0124512	A	1.21	0.690461
m706	mmu-miR-5130	0.49	0.165698		0.7	0.345854		0.8	0.597009		1.11	0.810133
m707	mmu-miR-5131	0.55	0.281974		0.37	0.0619201		1.33	0.641269		0.83	0.686671
m708	mmu-miR-5132-3p	1.01	0.991588		0.79	0.550977	B	1.03	0.951053	A	0.82	0.660373	A
m709	mmu-miR-5132-5p	32.55	0.219578	B	3.61	0.923845	B	1	1	C	0.14	0.106108	B
m710	mmu-miR-5133	3.25	0.0540245		1.14	0.780597		1.87	0.182094		0.71	0.541533
m711	mmu-miR-5134-3p	15.56	0.0053699	A	1.22	0.853735	B	0.66	0.706944	B	0.06	0.0139722	A
m712	mmu-miR-5135	0.92	0.888965	B	0.95	0.916738	B	1	0.9922	B	0.99	0.990652	B
m713	mmu-miR-5136	0.89	0.897598	B	0.66	0.6792	B	0.72	0.733088	B	0.55	0.557723	B
m714	mmu-miR-532-3p	1.16	0.765129		1.05	0.898899	A	0.89	0.788651	A	0.83	0.683753
m715	mmu-miR-532-5p	0.77	0.645811		1.88	0.126745	A	0.28	0.0104987	A	0.71	0.489227
m716	mmu-miR-539-3p	0.41	0.421493	B	0.77	0.684502	B	1.32	0.712107	B	2.32	0.466233	B
m717	mmu-miR-539-5p	30.22	0.250224	B	2.33	0.974896	B	1	1	C	0.09	0.0644106	B
m718	mmu-miR-540-3p	0.82	0.728627		0.89	0.781584		0.79	0.611509		0.85	0.748185
m719	mmu-miR-540-5p	0.4	0.236098	B	0.66	0.69752	B	0.34	0.158256	B	0.58	0.634369	B
m720	mmu-miR-541-3p	3.29	0.0889645	B	0.93	0.89082	A	3.73	0.0340403	B	1.15	0.82183	A
m721	mmu-miR-541-5p	19.54	0.371006	B	2.33	0.974896	B	1	1	C	0.14	0.131313	B
m722	mmu-miR-542-3p	1.02	0.981731	B	1.03	0.976339	B	0.69	0.67371	B	0.69	0.673113	B
m723	mmu-miR-542-5p	1.95	0.226516		1.37	0.436157		1.37	0.461084		1.01	0.988364
m724	mmu-miR-544-3p	1.57	0.61181	B	2.16	0.436749	B	0.62	0.667771	B	0.86	0.863058	B
m725	mmu-miR-544-5p	1.82	0.4847	B	2.12	0.395303	B	0.67	0.725005	B	0.76	0.68707	B
m726	mmu-miR-546	0.84	0.746889	B	0.79	0.545768	A	1.4	0.434054	B	1.36	0.516027	A
m727	mmu-miR-551b-3p	0.29	0.276506	B	1.24	0.693764	B	1.26	0.762751	B	5.12	0.14117	B
m728	mmu-miR-551b-5p	0.72	0.648452	B	1.27	0.828809	B	0.3	0.200307	B	0.54	0.54659	B
m729	mmu-miR-5615-5p	1.85	0.640332	B	0.36	0.420161	B	2.36	0.488086	B	0.43	0.504825	B
m730	mmu-miR-5616-3p	0.02	0.095196	B	1.73	0.660097	B	0.1	0.0460048	B	9.58	0.534078	B
m731	mmu-miR-5616-5p	0.01	0.0465895	B	0.38	0.46475	B	0.17	0.0797191	B	4.88	0.744752	B
m732	mmu-miR-5618-5p	0.56	0.268358		0.79	0.52627		0.88	0.762629		1.21	0.671687
m733	mmu-miR-5619-5p	37.89	0.180209	B	11.12	0.647612	B	1	1	C	0.38	0.386918	B
m734	mmu-miR-5620-5p	0.48	0.155644	A	0.62	0.23501	B	0.99	0.981745	A	1.28	0.665989	B
m735	mmu-miR-5621-5p	0.8	0.717545	B	0.95	0.957163	B	0.33	0.139275	B	0.41	0.28681	B
m736	mmu-miR-5622-3p	1.04	0.945578	B	1.02	0.972787	B	0.72	0.62689	B	0.7	0.550935	B
m737	mmu-miR-5622-5p	1.36	0.547003		0.99	0.974754		1.07	0.86608		0.79	0.606628
m738	mmu-miR-5623-3p	0.03	0.172274	B	0.77	0.839092	B	0.33	0.294905	B	9.58	0.534078	B
m739	mmu-miR-5623-5p	1.51	0.413058		0.71	0.368802	B	1.3	0.536161	A	0.61	0.268002	A
m740	mmu-miR-5625-3p	0.71	0.634319	B	1.28	0.80465	B	0.33	0.198339	B	0.62	0.619936	B
m741	mmu-miR-5626-3p	31.35	0.235687	B	4.88	0.870042	B	1	1	C	0.2	0.178085	B
m742	mmu-miR-5626-5p	0.51	0.194489	A	0.9	0.868019	B	0.49	0.150176	A	0.88	0.856474	B
m743	mmu-miR-5627-3p	1.05	0.926135		1.18	0.659963	A	0.72	0.440676	A	0.79	0.621349
m744	mmu-miR-5627-5p	0.71	0.526021		0.97	0.929103		1	0.997338		1.3	0.581969
m745	mmu-miR-5709-3p	1.99	0.172744	A	2.74	0.0606431	B	0.43	0.239203	B	0.63	0.290542	A
m746	mmu-miR-5709-5p	1.63	0.325027	A	2.11	0.082763	A	0.72	0.508141	B	0.94	0.89199
m747	mmu-miR-574-3p	0.91	0.858097		0.46	0.0734538	B	1.24	0.623516	A	0.61	0.293283	A
m748	mmu-miR-574-5p	2.04	0.379477	B	0.92	0.899979	B	1.82	0.480015	B	0.88	0.856439	B
m749	mmu-miR-582-3p	0.65	0.383798		1.44	0.347495	A	0.62	0.265022	A	1.36	0.487109
m750	mmu-miR-582-5p	2.49	0.321862	B	1.45	0.66791	B	1.39	0.776495	B	0.79	0.734837	B
m751	mmu-miR-590-5p	25.04	0.315028	B	13.59	0.578523	B	1	1	C	0.72	0.780127	B
m752	mmu-miR-592-3p	1.38	0.512686	A	1.12	0.764231	A	1.28	0.568157	B	1.04	0.933328
m753	mmu-miR-592-5p	1.67	0.326975		1.33	0.531707		1.84	0.152833		1.45	0.509316
m754	mmu-miR-598-3p	1.24	0.669023	A	1.34	0.47233	B	0.82	0.645841	B	0.88	0.777127	A
m755	mmu-miR-598-5p	0.96	0.946706	B	0.82	0.628943	B	1.37	0.494449	B	1.12	0.830505	B
m756	mmu-miR-599	0.68	0.48565	B	1	0.990718	A	1.23	0.634351	B	1.8	0.226656	A
m757	mmu-miR-615-3p	0.48	0.144754	A	1.22	0.702108	B	0.37	0.0294836	A	0.91	0.861532	B
m758	mmu-miR-615-5p	0.68	0.445518		0.97	0.936752	A	0.77	0.534949	A	1.07	0.87754
m759	mmu-miR-6236	0.26	0.0240611		0.71	0.366049		0.26	0.00620192	A	0.72	0.448801
m760	mmu-miR-6237	1.68	0.387342		0.81	0.675259		2.25	0.10877		1.06	0.917717
m761	mmu-miR-6238	1.11	0.841273		0.97	0.935207	B	0.65	0.319911	A	0.56	0.189046	A
m762	mmu-miR-6239	0.58	0.394744	B	1.27	0.569225	B	0.97	0.951845	B	2.16	0.170279	B
m763	mmu-miR-6240	0.84	0.727396		1.12	0.769559	A	0.61	0.244689	A	0.82	0.661605
m764	mmu-miR-6241	1.26	0.642158	A	0.9	0.785814	B	1.07	0.868526	B	0.74	0.490446	A
m765	mmu-miR-6244	3.26	0.0744381	A	1.36	0.761922	B	0.41	0.376178	B	0.2	0.0314959	A
m766	mmu-miR-6335	0.04	0.274669	B	0.37	0.388156	B	1.08	0.942573	B	10.73	0.510037	B
m767	mmu-miR-6336	16.19	0.0458918	B	1.55	0.537796	B	15.52	0.0335464	B	1.66	0.594022	B
m768	mmu-miR-6337	0.48	0.188632	B	0.93	0.882323	B	0.67	0.360638	B	1.27	0.708299	B
m769	mmu-miR-6338	4.89	0.829798	B	3.61	0.923845	B	1	1	C	0.91	0.944888	B
m770	mmu-miR-6339	0.6	0.366564	B	0.68	0.408172	B	0.93	0.870964	B	0.99	0.992039	B
m771	mmu-miR-6340	1.99	0.214683		1.35	0.547787		2.29	0.0946515		1.61	0.417272
m772	mmu-miR-6342	2.32	0.100516	A	0.87	0.716544	A	2.07	0.0965118	B	0.82	0.644809
m773	mmu-miR-6345	0.42	0.241338	B	1.32	0.769528	B	0.39	0.232518	B	1.23	0.829271	B
m774	mmu-miR-6347	2.07	0.154212	A	1.38	0.386515	A	1.32	0.518812	B	0.92	0.855202
m775	mmu-miR-6349	0.58	0.670993	B	0.8	0.822139	B	2.56	0.43473	B	3.16	0.392333	B
m776	mmu-miR-6352	0.39	0.0916245		0.76	0.455954		0.41	0.06331		0.79	0.589482
m777	mmu-miR-6356	1.27	0.634153	A	0.86	0.684067	A	1.48	0.369506	B	0.97	0.951899
m778	mmu-miR-6357	0.75	0.571487		0.6	0.166116		1.35	0.47898		1.07	0.881554
m779	mmu-miR-6358	54.81	0.0747745	B	9.88	0.686387	B	1	1	C	0.23	0.168533	B
m780	mmu-miR-6359	1.85	0.223649	A	1.05	0.902623	A	1.27	0.582845	B	0.74	0.507513
m781	mmu-miR-6364	1.8	0.279224		0.65	0.35603		2.7	0.0372903		0.97	0.957618
m782	mmu-miR-6366	3.08	0.196659		1.72	0.418458		1.37	0.603753		0.82	0.803855
m783	mmu-miR-6367	3.68	0.256377		0.99	0.993214		4.17	0.1511		1.23	0.870422
m784	mmu-miR-6368	1.41	0.697992	B	0.94	0.953572	B	0.84	0.871181	B	0.59	0.603821	B
m785	mmu-miR-6371	0.98	0.976272	B	0.45	0.434285	B	0.8	0.799213	B	0.37	0.323402	B
m786	mmu-miR-6372	1.01	0.992357	B	1.12	0.92045	B	0.42	0.388506	B	0.49	0.472252	B
m787	mmu-miR-6373	0.2	0.136509	B	1.26	0.784964	B	0.58	0.491105	B	3.41	0.296739	B
m788	mmu-miR-6374	1.43	0.524128		1.42	0.399839		1.22	0.646343		1.24	0.684482
m789	mmu-miR-6375	1.75	0.636417	B	0.69	0.550854	B	3.84	0.118363	B	1.59	0.690471	B
m790	mmu-miR-6376	0.13	0.143678	B	0.66	0.705211	B	1.14	0.90655	B	5.41	0.213351	B
m791	mmu-miR-6377	68.72	0.0452879	B	16.07	0.54319	B	1	1	C	0.32	0.237425	B
m792	mmu-miR-6378	1.2	0.739758		0.86	0.795307	B	0.37	0.0517499	A	0.28	0.0111983	A
m793	mmu-miR-6379	0.4	0.277102	B	1.04	0.967447	B	0.33	0.22448	B	0.88	0.90074	B
m794	mmu-miR-6381	0.79	0.815638	B	0.49	0.537811	B	0.95	0.960132	B	0.6	0.655697	B
m795	mmu-miR-6385	43.2	0.139879	B	8.63	0.728309	B	1	1	C	0.26	0.231495	B
m796	mmu-miR-6388	4.58	0.0272409	A	1.41	0.592419		4.47	0.0187143	A	1.47	0.637668
m797	mmu-miR-6390	33.99	0.215314	B	17.3	0.52836	B	1	1	C	0.67	0.718756	B
m798	mmu-miR-6391	85.93	0.0168566	A	4.88	0.870042	B	1	1	C	0.07	0.0120052	A
m799	mmu-miR-6392-3p	2.52	0.0757564	A	0.85	0.67851	B	1.42	0.414843	B	0.48	0.112004	A
m800	mmu-miR-6392-5p	1.85	0.233714		1.79	0.132858	A	0.73	0.474238	A	0.73	0.503152
m801	mmu-miR-6394	1.83	0.302782	B	1.2	0.630183	A	2.06	0.124363	B	1.39	0.456836	A
m802	mmu-miR-6395	0.89	0.893901	B	1.08	0.930654	B	0.76	0.768766	B	0.96	0.964605	B
m803	mmu-miR-6397	2.33	0.163511		1.05	0.920691		3.35	0.0306418		1.59	0.491984
m804	mmu-miR-6398	24.61	0.303505	B	2.33	0.974896	B	1	1	C	0.11	0.0907461	B
m805	mmu-miR-6400	35.2	0.198035	B	3.61	0.923845	B	1	1	C	0.13	0.0931878	B
m806	mmu-miR-6401	71.8	0.0339835	B	8.63	0.728309	B	1	1	C	0.16	0.0663889	B
m807	mmu-miR-6403	2.22	0.138687		1.24	0.628023		2.07	0.10545		1.2	0.735056
m808	mmu-miR-6404	0.87	0.807099	B	1.7	0.300571	B	0.44	0.121843	B	0.87	0.780346	B
m809	mmu-miR-6405	0.03	0.209592	B	1.17	0.893301	B	0.19	0.145745	B	7.25	0.622995	B
m810	mmu-miR-6406	1.4	0.507583	A	0.87	0.728338	B	1.09	0.842213	B	0.69	0.41742	A
m811	mmu-miR-6407	0.01	0.0183216		0.43	0.502372	B	0.21	0.0453821		7.25	0.622995	B
m812	mmu-miR-6409	1.65	0.323747	A	0.91	0.809198	B	1.37	0.46383	B	0.79	0.588118	A
m813	mmu-miR-6410	21.32	0.34383	B	3.61	0.923845	B	1	1	C	0.21	0.211312	B
m814	mmu-miR-6411	0.05	0.403321	B	1.4	0.765477	B	0.74	0.795299	B	18.7	0.405819	B
m815	mmu-miR-6412	1.85	0.246547	A	1.16	0.714852	B	1.51	0.388819	B	0.94	0.895748	A
m816	mmu-miR-6413	34.05	0.206585	B	8.63	0.728309	B	1	1	C	0.32	0.324814	B
m817	mmu-miR-6414	0.83	0.830309	B	0.93	0.941978	B	0.74	0.762356	B	0.87	0.895521	B
m818	mmu-miR-6415	1.14	0.817688	B	0.75	0.48103	B	1.26	0.594245	B	0.81	0.669909	B
m819	mmu-miR-6416-3p	1.75	0.294726	A	0.35	0.0560111	B	1.61	0.284986	B	0.32	0.0730245	A
m820	mmu-miR-6416-5p	0.96	0.96285	B	2.08	0.468112	B	0.35	0.316897	B	0.79	0.785727	B
m821	mmu-miR-6417	3.13	0.0574478	A	0.84	0.734949		3.46	0.041051	A	0.98	0.96664
m822	mmu-miR-6418-3p	0.69	0.652039	B	1.06	0.929831	B	0.83	0.814744	B	1.28	0.766675	B
m823	mmu-miR-6418-5p	82.04	0.0102151	A	0.83	0.852333	B	23.85	0.320349	B	0.29	0.0710353	A
m824	mmu-miR-6419	0.71	0.654546	B	1.17	0.880474	B	0.29	0.212267	B	0.51	0.48026	B
m825	mmu-miR-6420	1.63	0.330808		0.75	0.428947		1.9	0.135863		0.87	0.767641
m826	mmu-miR-6481	2.59	0.0946861	A	1.39	0.383862	A	1.98	0.139848	B	1.14	0.775424
m827	mmu-miR-6516-5p	2.46	0.139301		1.67	0.26957	B	1.33	0.715244	B	0.92	0.866085
m828	mmu-miR-652-3p	0.68	0.476898	A	1.56	0.377758	B	0.38	0.0627448	A	0.93	0.88965	B
m829	mmu-miR-652-5p	0.04	0.265943	B	1.22	0.852666	B	0.15	0.125031	B	4.88	0.744752	B
m830	mmu-miR-653-3p	0.03	0.212564	B	1.06	0.96053	B	0.4	0.403853	B	14.16	0.455267	B
m831	mmu-miR-653-5p	0.97	0.956506		1.23	0.651399	A	0.91	0.815931	A	1.2	0.684352
m832	mmu-miR-6537-3p	2.19	0.120829	A	1.56	0.242344		1.86	0.153248		1.34	0.542486
m833	mmu-miR-6537-5p	1.28	0.695894	B	1.41	0.442214	A	1.46	0.479941	B	1.59	0.360911	A
m834	mmu-miR-6538	1.01	0.990776		1.95	0.0795644	A	0.37	0.0260464	A	0.74	0.538952
m835	mmu-miR-6539	3.94	0.299362	B	1.19	0.832457	B	4.4	0.227292	B	1.29	0.823274	B
m836	mmu-miR-654-3p	1.65	0.352097	A	1.19	0.734984	B	1.25	0.684194	B	0.89	0.800045	A
m837	mmu-miR-654-5p	0.03	0.202247	B	0.42	0.489159	B	0.62	0.656652	B	8.42	0.573184	B
m838	mmu-miR-6540-3p	0.03	0.231132	B	1.47	0.751395	B	0.31	0.309494	B	14.16	0.455267	B
m839	mmu-miR-6540-5p	1.27	0.820914	B	1.05	0.959494	B	1.15	0.901254	B	0.93	0.945314	B
m840	mmu-miR-6541	0.38	0.0578777	A	0.74	0.574135	B	0.47	0.0838619	A	0.93	0.909956	B
m841	mmu-miR-6546-3p	1.3	0.75678	B	0.66	0.69707	B	0.76	0.798545	B	0.39	0.357277	B
m842	mmu-miR-664-3p	1.15	0.812628		1.43	0.410103		0.77	0.571458		0.97	0.963753
m843	mmu-miR-664-5p	0.73	0.529991		0.6	0.235987	B	0.59	0.217775	A	0.47	0.107215	A
m844	mmu-miR-665-3p	1.3	0.793332	B	2.17	0.530724	B	0.32	0.34064	B	0.6	0.627531	B
m845	mmu-miR-666-3p	1.31	0.589666		1.22	0.612058	A	0.95	0.903478		0.88	0.779021
m846	mmu-miR-666-5p	1.4	0.500872	A	1.07	0.857796	B	1.04	0.932599	B	0.82	0.642496	A
m847	mmu-miR-667-3p	4.38	0.0178382	A	0.89	0.753876		1.95	0.121536	A	0.39	0.0905248
m848	mmu-miR-667-5p	2.53	0.0724253	A	0.92	0.842527		3.28	0.0106039	A	1.26	0.642476
m849	mmu-miR-668-3p	0.67	0.565394	B	0.8	0.833046	B	0.44	0.306262	B	0.55	0.549991	B
m850	mmu-miR-668-5p	22.69	0.338173	B	16.07	0.54319	B	1	1	C	0.93	0.951296	B
m851	mmu-miR-669b-5p	19.27	0.39015	B	1	1	C	1	1	C	0.05	0.415927	B
m852	mmu-miR-669c-5p	0.04	0.318425	B	0.48	0.560008	B	0.64	0.694986	B	7.25	0.622995	B
m853	mmu-miR-669f-5p	0.32	0.923395	B	1.13	0.915871	B	3.79	0.293186	B	14.16	0.455267	B
m854	mmu-miR-669j	0.81	0.827313	B	0.26	0.294753	B	0.79	0.836366	B	0.26	0.263357	B
m855	mmu-miR-669n	3.79	0.0221502	A	1.24	0.716292		4.94	0.0205818	A	1.67	0.388004
m856	mmu-miR-670-3p	0.12	0.687423	B	0.13	0.100017	B	6.19	0.164988	B	6.08	0.678228	B
m857	mmu-miR-671-3p	0.88	0.802024	B	0.86	0.756707	B	0.87	0.783382	B	0.87	0.791863	B
m858	mmu-miR-671-5p	1.09	0.919923	B	0.78	0.806539	B	0.77	0.791397	B	0.56	0.559544	B
m859	mmu-miR-6715-3p	1.72	0.320999	A	0.78	0.607839		1.68	0.327197	B	0.83	0.710758
m860	mmu-miR-6715-5p	0.54	0.36407	B	1.33	0.713378	B	0.43	0.181505	B	1.07	0.936772	B
m861	mmu-miR-672-3p	1.46	0.453309		1.04	0.908243	A	1.22	0.642964	A	0.9	0.806159
m862	mmu-miR-673-3p	44.11	0.129114	B	11.12	0.647612	B	1	1	C	0.33	0.307413	B
m863	mmu-miR-673-5p	0.02	0.0649164	B	0.31	0.33364	B	0.47	0.347977	B	8.42	0.573184	B
m864	mmu-miR-674-3p	1.23	0.687142		1.28	0.547056	A	0.75	0.498517	A	0.81	0.641414
m865	mmu-miR-674-5p	0.67	0.491065	B	1.23	0.735477	B	0.55	0.251372	B	0.99	0.991046	B
m866	mmu-miR-675-3p	0.03	0.214474	B	0.5	0.585169	B	0.39	0.380642	B	6.08	0.678228	B
m867	mmu-miR-675-5p	0.52	0.515053	B	0.58	0.560951	B	0.87	0.863167	B	0.91	0.939789	B
m868	mmu-miR-676-3p	0.52	0.202627		0.63	0.239573	B	0.67	0.338202	A	0.77	0.581026	A
m869	mmu-miR-676-5p	1.22	0.714478	B	1.08	0.835977	A	1.46	0.376609	B	1.33	0.530986	A
m870	mmu-miR-6769b-3p	0.78	0.805396	B	0.81	0.874864	B	0.38	0.416658	B	0.42	0.470189	B
m871	mmu-miR-6769b-5p	1.97	0.183347	A	1.17	0.666298	A	1.91	0.135439	B	1.19	0.699703
m872	mmu-miR-677-3p	1.1	0.852127	B	0.98	0.952516	B	1.28	0.56017	B	1.13	0.793983	B
m873	mmu-miR-677-5p	0.59	0.534198	B	1.14	0.899325	B	0.46	0.395294	B	0.87	0.89357	B
m874	mmu-miR-678	0.03	0.240203	B	0.05	0.38887	B	0.87	0.89686	B	1	1	C
m875	mmu-miR-680	0.37	0.0584499	A	1.48	0.350635	B	0.27	0.00780256	A	1.1	0.838471	B
m876	mmu-miR-682	1.03	0.956958	B	2.51	0.0576685	B	0.46	0.18955	B	1.13	0.79378	B
m877	mmu-miR-683	28.34	0.265052	B	6.14	0.819621	B	1	1	C	0.28	0.286278	B
m878	mmu-miR-684	1.44	0.494915	A	1.94	0.149581	B	0.75	0.625092	B	1.05	0.916966	A
m879	mmu-miR-686	0.65	0.440003	B	0.37	0.0438282	A	2.4	0.103625	A	1.31	0.65355	B
m880	mmu-miR-688	2.5	0.18295		1.06	0.932961		3.21	0.1046		1.46	0.630331
m881	mmu-miR-6896-3p	0.04	0.281723	B	1.12	0.923716	B	0.3	0.296408	B	8.42	0.573184	B
m882	mmu-miR-6896-5p	33.13	0.21553	B	14.83	0.559455	B	1	1	C	0.58	0.62768	B
m883	mmu-miR-6897-3p	50.92	0.0997488	B	7.38	0.773576	B	1	1	C	0.19	0.134442	B
m884	mmu-miR-6897-5p	0.97	0.971977	B	1.56	0.651581	B	0.68	0.711035	B	1.05	0.964572	B
m885	mmu-miR-6898-3p	2.1	0.459003	B	0.94	0.956159	B	0.9	0.924471	B	0.44	0.440761	B
m886	mmu-miR-6898-5p	11.98	0.0030875	A	1.42	0.723234	B	0.84	0.864693	B	0.1	0.0148802	A
m887	mmu-miR-6899-5p	2.28	0.131342	A	1.31	0.53889	A	2.13	0.116378	B	1.26	0.646894
m888	mmu-miR-690	1.29	0.620149		1.05	0.935761	B	0.63	0.406047	B	0.53	0.245238
m889	mmu-miR-6900-5p	2.69	0.0642041	A	0.96	0.928788		3.56	0.00883428	A	1.27	0.66256
m890	mmu-miR-6901-3p	19.27	0.380069	B	13.59	0.578523	B	1	1	C	0.89	0.925522	B
m891	mmu-miR-6901-5p	0.02	0.133767	B	0.42	0.483654	B	0.47	0.440281	B	8.42	0.573184	B
m892	mmu-miR-6902-3p	0.04	0.295823	B	0.31	0.365027	B	0.53	0.559441	B	3.66	0.825669	B
m893	mmu-miR-6902-5p	0.36	0.303774	B	1.27	0.645609	B	1.05	0.935917	B	3.58	0.200674	B
m894	mmu-miR-6903-3p	0.04	0.269748	B	4.85	0.865817	B	0.05	0.385873	B	6.08	0.678228	B
m895	mmu-miR-6904-3p	131.55	0.0043542	A	2.33	0.974896	B	1	1	C	0.02	0.000699976	A
m896	mmu-miR-6904-5p	1.31	0.59014	A	0.96	0.904369	A	1.24	0.613348	B	0.95	0.910571
m897	mmu-miR-6905-3p	0.01	0.01787	A	0.6	0.695772	B	0.13	0.0225275	A	7.25	0.622995	B
m898	mmu-miR-6905-5p	0.8	0.646759		0.85	0.693694	B	0.67	0.355442	A	0.74	0.516312	A
m899	mmu-miR-6906-3p	1.06	0.910233		1.02	0.964909		1.18	0.697195		1.15	0.76671
m900	mmu-miR-6906-5p	0.82	0.713295	B	0.41	0.0461367	A	2.83	0.0564843	A	1.32	0.577707	B
m901	mmu-miR-6907-3p	47.19	0.123472	B	2.04	0.352836	B	21.23	0.324554	B	1.26	0.753189	B
m902	mmu-miR-6907-5p	1.6	0.477276	B	1.25	0.68083	B	1.28	0.759603	B	0.96	0.948833	B
m903	mmu-miR-6908-3p	3.69	0.0221381	A	1.03	0.957348		3.81	0.00904728	A	1.09	0.882426
m904	mmu-miR-6909-5p	2.28	0.103731	A	1	0.996155	A	1.61	0.268992	B	0.74	0.497055
m905	mmu-miR-691	4.94	0.177886	B	2.48	0.253849	B	3.35	0.328263	B	1.77	0.49076	B
m906	mmu-miR-6910-3p	1.68	0.300221	A	1.6	0.218839		1.65	0.246963		1.57	0.34245
m907	mmu-miR-6910-5p	1.15	0.777878		1.35	0.42675	A	0.96	0.920097	A	1.13	0.79546
m908	mmu-miR-6911-3p	0.19	0.140068	B	1.1	0.943369	B	0.24	0.188595	B	1.38	0.794927	B
m909	mmu-miR-6911-5p	1.35	0.586248		0.71	0.408607		1.7	0.235815		0.94	0.916055
m910	mmu-miR-6912-5p	2.16	0.19168		1.35	0.461005	B	0.49	0.0990033	A	0.31	0.0522848	A
m911	mmu-miR-6913-3p	20.79	0.391378	B	1	1	C	1	1	C	0.05	0.431211	B
m912	mmu-miR-6914-3p	81.37	0.01764	A	8.63	0.728309	B	1	1	C	0.14	0.040912	A
m913	mmu-miR-6915-3p	47.06	0.118119	B	6.14	0.819621	B	1	1	C	0.17	0.11727	B
m914	mmu-miR-6915-5p	1.6	0.345582	A	1.04	0.927117		2.18	0.0734717	A	1.42	0.456943
m915	mmu-miR-6916-5p	1.63	0.339182	A	0.93	0.859508		2.42	0.0445806	A	1.36	0.527943
m916	mmu-miR-6917-5p	25.44	0.287775	B	7.38	0.773576	B	1	1	C	0.37	0.40164	B
m917	mmu-miR-6918-3p	33.99	0.223822	B	3.61	0.923845	B	1	1	C	0.13	0.101784	B
m918	mmu-miR-6918-5p	0.64	0.379513	A	1.12	0.763973	A	0.82	0.636823	A	1.4	0.458893	A
m919	mmu-miR-692	1.21	0.706618	B	1.18	0.652365	A	1.63	0.256967	B	1.65	0.269707	A
m920	mmu-miR-6920-3p	54.55	0.10931	B	1	1	C	1	1	C	0.02	0.207466	B
m921	mmu-miR-6920-5p	0.03	0.231708	B	0.99	0.998373	B	0.2	0.171013	B	6.08	0.678228	B
m922	mmu-miR-6921-5p	1.42	0.49278	A	1.32	0.471918	A	1.24	0.628627	B	1.19	0.700469
m923	mmu-miR-6922-3p	0.05	0.361697	B	0.64	0.719354	B	0.59	0.643537	B	7.25	0.622995	B
m924	mmu-miR-6922-5p	0.9	0.841066	B	1.72	0.208136	B	0.6	0.265724	B	1.11	0.821579	B
m925	mmu-miR-6923-3p	2.21	0.556082	B	1.19	0.847928	B	5.6	0.170948	B	2.91	0.397217	B
m926	mmu-miR-6923-5p	1.19	0.799381	B	1.01	0.992857	B	1.09	0.913389	B	0.91	0.889245	B
m927	mmu-miR-6924-5p	1.54	0.391243	A	1.35	0.514516	B	0.68	0.44442	B	0.61	0.2691	A
m928	mmu-miR-6925-3p	3.06	0.0443088	A	0.96	0.941917		3.8	0.0134931	A	1.22	0.762252
m929	mmu-miR-6925-5p	0.01	0.079794	B	0.59	0.644118	B	0.35	0.273622	B	14.16	0.455267	B
m930	mmu-miR-6926-5p	0.55	0.237201	A	1.71	0.28357	B	0.4	0.0429741	A	1.22	0.701256	B
m931	mmu-miR-6927-3p	2.18	0.224414		1.18	0.736864		3.23	0.0396277	A	1.84	0.300353
m932	mmu-miR-6927-5p	1.07	0.906127		1.29	0.524945		0.66	0.349592		0.78	0.63695
m933	mmu-miR-6928-3p	0.98	0.966338		1	0.991398	B	0.73	0.462381	A	0.73	0.468586	A
m934	mmu-miR-6929-5p	27.5	0.265939	B	4.88	0.870042	B	1	1	C	0.23	0.221527	B
m935	mmu-miR-6930-3p	20.08	0.364622	B	1	1	C	1	1	C	0.05	0.411289	B
m936	mmu-miR-6930-5p	1.22	0.696128	A	0.69	0.337961	B	1.44	0.396427	B	0.84	0.706135	A
m937	mmu-miR-6931-5p	0.91	0.845509		0.56	0.194356	B	1.61	0.32376		0.99	0.982011	B
m938	mmu-miR-6932-5p	0.72	0.523702	A	0.93	0.931202	B	0.38	0.0511434	A	0.49	0.23666	B
m939	mmu-miR-6933-3p	14.18	0.479766	B	7.38	0.773576	B	1	1	C	0.66	0.736863	B
m940	mmu-miR-6933-5p	2.14	0.281077		1.46	0.65543		2.13	0.34283		1.62	0.591249
m941	mmu-miR-6934-5p	0.76	0.612774	B	0.86	0.696967	B	1.34	0.500716	B	1.46	0.429651	B
m942	mmu-miR-6935-3p	44.41	0.136719	B	2.33	0.974896	B	1	1	C	0.06	0.0266177	B
m943	mmu-miR-6935-5p	0.99	0.98031	B	0.9	0.869583	B	0.76	0.616238	B	0.69	0.575556	B
m944	mmu-miR-6936-3p	0.55	0.243581	A	1.19	0.682053	B	0.63	0.327608	A	1.32	0.5678	B
m945	mmu-miR-6936-5p	0.52	0.296847		1.27	0.530215		0.24	0.0045054		0.57	0.280305
m946	mmu-miR-6937-5p	0.97	0.983371	B	0.84	0.886613	B	1.57	0.707305	B	1.23	0.874032	B
m947	mmu-miR-6938-3p	1.68	0.521193	B	0.56	0.498641	B	1.75	0.539332	B	0.59	0.544893	B
m948	mmu-miR-6938-5p	0.84	0.726319		0.92	0.828836		1.39	0.441821		1.48	0.404932
m949	mmu-miR-6939-5p	0.01	0.0327748	B	0.29	0.342328	B	0.22	0.0810647	B	4.88	0.744752	B
m950	mmu-miR-6940-5p	1.05	0.927025		0.75	0.483094		1.8	0.204682		1.24	0.656577
m951	mmu-miR-6941-5p	0.25	0.033143		1.39	0.407638		0.22	0.0101093		1.31	0.596666
m952	mmu-miR-6942-3p	0.76	0.70378	B	1.01	0.984717	B	1.14	0.833528	B	1.5	0.593759	B
m953	mmu-miR-6943-3p	4.36	0.0593459		1	0.998835		5.27	0.0594408		1.3	0.785553
m954	mmu-miR-6943-5p	1.04	0.944828	B	1.46	0.329807	A	1.01	0.976709	B	1.41	0.433674	A
m955	mmu-miR-6944-3p	30.21	0.24383	B	7.38	0.773576	B	1	1	C	0.31	0.315167	B
m956	mmu-miR-6944-5p	0.68	0.450765	A	0.79	0.546663	B	0.98	0.9596	A	1.12	0.812651	B
m957	mmu-miR-6945-3p	0.02	0.0945581	B	0.25	0.26726	B	0.45	0.381057	B	6.08	0.678228	B
m958	mmu-miR-6945-5p	39.92	0.166157	B	11.12	0.647612	B	1	1	C	0.37	0.37068	B
m959	mmu-miR-6946-3p	1.72	0.671602	B	2	0.464463	B	1.83	0.612385	B	2	0.572036	B
m960	mmu-miR-6946-5p	10.17	0.0109349		1.32	0.699769	B	4.96	0.188021	B	0.71	0.562561
m961	mmu-miR-6947-5p	28.63	0.266962	B	7.38	0.773576	B	1	1	C	0.34	0.354626	B
m962	mmu-miR-6948-3p	2.62	0.0908424	A	1.72	0.249705	B	1.03	0.963413	B	0.72	0.467246	A
m963	mmu-miR-6948-5p	1.29	0.758674	B	4.76	0.13805	B	0.28	0.25045	B	1.05	0.953411	B
m964	mmu-miR-6949-5p	1.44	0.516437	B	1.27	0.582473	B	1.17	0.754534	B	1.07	0.892713	B
m965	mmu-miR-695	1.56	0.658676	B	0.35	0.410045	B	1.28	0.834494	B	0.28	0.273441	B
m966	mmu-miR-6950-3p	21.86	0.343673	B	6.14	0.819621	B	1	1	C	0.36	0.395836	B
m967	mmu-miR-6950-5p	2.45	0.0800806	A	0.99	0.97927		2.86	0.0171515	A	1.2	0.714356
m968	mmu-miR-6952-5p	1.47	0.475584		1.34	0.455519		1.1	0.823362		1.04	0.938365
m969	mmu-miR-6953-3p	2.17	0.230108	B	1.17	0.754066	A	2.91	0.0368564	B	1.68	0.412037	A
m970	mmu-miR-6953-5p	0.62	0.473646	B	2.67	0.358976	B	0.14	0.0450602	B	0.66	0.605546	B
m971	mmu-miR-6954-3p	0.83	0.720165	B	0.93	0.883237	B	0.73	0.48955	B	0.81	0.703928	B
m972	mmu-miR-6955-5p	0.81	0.662541		1.1	0.791164	A	1.06	0.89011	A	1.41	0.438173
m973	mmu-miR-6956-3p	46.79	0.116231	B	13.59	0.578523	B	1	1	C	0.37	0.357102	B
m974	mmu-miR-6956-5p	0.61	0.376984	B	0.61	0.23208	B	1.25	0.610249	B	1.24	0.727739	B
m975	mmu-miR-6957-3p	1.62	0.359749	A	0.7	0.34556		2.82	0.0191979	A	1.25	0.619859
m976	mmu-miR-6957-5p	32.84	0.223973	B	6.14	0.819621	B	1	1	C	0.24	0.221553	B
m977	mmu-miR-6958-5p	2.22	0.353396	B	1.55	0.622605	B	1.02	0.988153	B	0.69	0.583346	B
m978	mmu-miR-6959-3p	1.32	0.641403		1.33	0.520191		0.99	0.979931		1	0.994381
m979	mmu-miR-6959-5p	0.8	0.685618	B	0.58	0.157177	B	1.82	0.171131	B	1.27	0.637221	B
m980	mmu-miR-696	7.41	0.157447	B	1.22	0.845973	B	7.75	0.109917	B	1.31	0.833657	B
m981	mmu-miR-6960-3p	1.29	0.632473	B	0.68	0.307952		2.31	0.0567859	A	1.16	0.734172	A
m982	mmu-miR-6960-5p	2.91	0.0800437		1.47	0.3538		1.46	0.373056		0.78	0.669658
m983	mmu-miR-6961-3p	3.44	0.176732	B	0.78	0.732734	B	2.77	0.334077	B	0.66	0.590948	B
m984	mmu-miR-6962-3p	3.9	0.0943151		1.14	0.882435		4.39	0.075756		1.36	0.754667
m985	mmu-miR-6962-5p	0.78	0.695318	B	1.59	0.395639	B	0.73	0.617467	B	1.42	0.562544	B
m986	mmu-miR-6963-5p	12.88	0.0046508		0.82	0.609655		1.46	0.373978		0.09	0.00592702
m987	mmu-miR-6964-5p	1.21	0.748074	B	0.67	0.372858	B	1.51	0.383941	B	0.86	0.79462	B
m988	mmu-miR-6965-3p	3.67	0.0247536	A	1.33	0.620377		3.76	0.0179773	A	1.4	0.62253
m989	mmu-miR-6968-5p	0.76	0.622943	B	0.96	0.913652	B	0.78	0.606549	B	0.93	0.887936	B
m990	mmu-miR-6969-3p	1.43	0.618695	B	0.72	0.533577	B	1.6	0.399827	B	0.81	0.769878	B
m991	mmu-miR-6969-5p	0.26	0.177924	B	1	0.994858	B	0.92	0.887175	B	3.54	0.261696	B
m992	mmu-miR-697	1.77	0.295021		1.35	0.444068	A	1.55	0.363625	B	1.25	0.609096
m993	mmu-miR-6970-5p	1.21	0.845875	B	0.54	0.485075	B	2.13	0.428206	B	0.96	0.972482	B
m994	mmu-miR-6971-3p	48.23	0.123206	B	3.61	0.923845	B	1	1	C	0.1	0.0502533	B
m995	mmu-miR-6971-5p	2.81	0.425851	B	1.08	0.935479	B	2.57	0.434546	B	0.92	0.948395	B
m996	mmu-miR-6972-5p	2.7	0.066976	A	3.12	0.00839821	A	0.83	0.671811	B	1.03	0.953148
m997	mmu-miR-6973a-3p	2.16	0.149216	A	0.62	0.253367	B	1.19	0.691534	B	0.34	0.0389071	A
m998	mmu-miR-6973a-5p	1.13	0.820292	B	0.78	0.509062	B	1.57	0.294191	B	1.08	0.869713	B
m999	mmu-miR-6973b-3p	3.54	0.136333	B	1.63	0.466187	B	1.92	0.566611	B	0.92	0.884057	B
m1000	mmu-miR-6973b-5p	1.48	0.43312	A	1.09	0.821536	A	1.45	0.39136	B	1.1	0.835693
m1001	mmu-miR-6974-3p	0.02	0.129158	B	0.48	0.570664	B	0.37	0.326299	B	7.25	0.622995	B
m1002	mmu-miR-6974-5p	1.77	0.589909	B	3.21	0.359045	B	0.29	0.290203	B	0.58	0.623974	B
m1003	mmu-miR-6975-3p	1.24	0.801372	B	3.44	0.23034	B	0.38	0.39089	B	1.09	0.920879	B
m1004	mmu-miR-6976-3p	1.12	0.82275		1	0.996438	A	0.96	0.920802	A	0.84	0.687525
m1005	mmu-miR-6976-5p	0.93	0.892069	B	1.03	0.956589	B	0.64	0.399636	B	0.68	0.470358	B
m1006	mmu-miR-6977-3p	0.94	0.905193		1.3	0.482264	A	1.33	0.509647	A	1.82	0.189811
m1007	mmu-miR-6977-5p	2.07	0.246133	A	1.34	0.773224	B	0.35	0.229818	B	0.25	0.0669707	A
m1008	mmu-miR-6978-3p	2.88	0.0781834	A	1.04	0.933054		2.97	0.0567273		1.11	0.852667
m1009	mmu-miR-6978-5p	1.29	0.737652	B	1.28	0.783829	B	0.7	0.704368	B	0.72	0.698519	B
m1010	mmu-miR-6979-3p	1.01	0.984034		2.24	0.0372137	A	0.56	0.183149	A	1.29	0.57139
m1011	mmu-miR-6979-5p	0.86	0.756254	B	1.07	0.863355	A	1.21	0.656673	B	1.47	0.38448	A
m1012	mmu-miR-698-3p	0.78	0.614075		0.93	0.870433	B	0.53	0.142251	A	0.63	0.324575	A
m1013	mmu-miR-698-5p	2.86	0.0638251		2.14	0.064813		1.32	0.524991		1.03	0.955067
m1014	mmu-miR-6980-3p	49.43	0.108807	B	8.63	0.728309	B	1	1	C	0.23	0.18408	B
m1015	mmu-miR-6980-5p	46.79	0.116231	B	4.88	0.870042	B	1	1	C	0.13	0.0771513	B
m1016	mmu-miR-6981-5p	1.73	0.41094	B	0.78	0.823233	B	0.51	0.499398	B	0.25	0.109483	B
m1017	mmu-miR-6982-3p	39.1	0.164248	B	6.14	0.819621	B	1	1	C	0.2	0.162103	B
m1018	mmu-miR-6982-5p	1.1	0.874591	B	0.52	0.13447	B	1.92	0.13968	B	0.93	0.909849	B
m1019	mmu-miR-6983-3p	4.56	0.187682	B	0.29	0.283155	B	4.65	0.213857	B	0.3	0.30156	B
m1020	mmu-miR-6983-5p	0.75	0.560063		1.67	0.17772	A	0.68	0.368488	A	1.55	0.331195
m1021	mmu-miR-6984-5p	1.36	0.55611		2.36	0.0248557	A	0.62	0.257024	A	1.11	0.831121
m1022	mmu-miR-6985-5p	9.14	0.0461138	B	1.18	0.802805	B	7.73	0.100124	B	1.08	0.901371	B
m1023	mmu-miR-6986-3p	0.78	0.616128		0.66	0.304064	B	0.89	0.781441	A	0.76	0.576822	A
m1024	mmu-miR-6986-5p	60.2	0.0638266	B	4.88	0.870042	B	1	1	C	0.1	0.044096	B
m1025	mmu-miR-6987-5p	0.03	0.197699	B	0.09	0.0739148	B	0.8	0.820344	B	2.39	0.921973	B
m1026	mmu-miR-6988-5p	1.12	0.831435	B	0.87	0.765144	B	1.07	0.879401	B	0.87	0.786831	B
m1027	mmu-miR-6989-5p	1.75	0.449469	B	0.7	0.404864	B	2.58	0.071286	B	1.1	0.8706	B
m1028	mmu-miR-6990-5p	0.59	0.300103		0.93	0.856683	A	0.76	0.514375	A	1.17	0.724452
m1029	mmu-miR-6991-3p	0.7	0.508769		0.68	0.337345		1.34	0.544925		1.23	0.669743
m1030	mmu-miR-6991-5p	2.25	0.17173	A	0.99	0.980626		2.37	0.0683182	A	1.05	0.938103
m1031	mmu-miR-6992-5p	1.68	0.348295		1.27	0.541586		1.09	0.833392		0.86	0.76439
m1032	mmu-miR-6993-5p	1.22	0.72256	B	0.69	0.369382	B	1.61	0.290569	B	0.92	0.880833	B
m1033	mmu-miR-6994-3p	2.18	0.444989	B	0.69	0.741571	B	1.37	0.785545	B	0.45	0.449922	B
m1034	mmu-miR-6994-5p	0.78	0.633156	A	0.93	0.862185	B	0.8	0.63393	A	0.94	0.907266	B
m1035	mmu-miR-6995-3p	0.53	0.202483	A	1.01	0.973717	B	0.65	0.323474	A	1.23	0.660567	B
m1036	mmu-miR-6995-5p	1.7	0.297567	A	0.84	0.674995	B	1.37	0.479848	B	0.68	0.398135	A
m1037	mmu-miR-6997-3p	0.03	0.186024	B	0.21	0.232501	B	0.51	0.523516	B	3.66	0.825669	B
m1038	mmu-miR-6997-5p	1.45	0.645278	B	1.02	0.980331	B	0.91	0.924264	B	0.64	0.609809	B
m1039	mmu-miR-6998-5p	0.85	0.784118	B	1.45	0.37039	B	1.01	0.978203	B	1.7	0.284104	B
m1040	mmu-miR-6999-5p	2.37	0.534676	B	1.4	0.720573	B	7.08	0.124501	B	4.3	0.259406	B
m1041	mmu-miR-700-3p	0.57	0.28247	A	0.95	0.913434	B	0.69	0.393102	A	1.16	0.787691	B
m1042	mmu-miR-700-5p	1.26	0.64412		0.76	0.460974		1.85	0.150835		1.09	0.858425
m1043	mmu-miR-7000-5p	1.26	0.860725	B	2.02	0.502934	B	2.46	0.463335	B	3.69	0.334621	B
m1044	mmu-miR-7001-3p	0.04	0.295823	B	0.36	0.344745	B	1.45	0.717801	B	11.88	0.489335	B
m1045	mmu-miR-7001-5p	0.97	0.949326		1.07	0.869979	B	0.48	0.102016	A	0.54	0.173671	A
m1046	mmu-miR-7002-3p	0.03	0.203547	B	0.23	0.239853	B	1	0.999635	B	7.25	0.622995	B
m1047	mmu-miR-7002-5p	3.43	0.0865569		1.13	0.77156	B	0.55	0.180194	A	0.18	0.0232801	A
m1048	mmu-miR-7003-5p	1.28	0.637803	B	0.56	0.218345	B	1.4	0.454375	B	0.61	0.377495	B
m1049	mmu-miR-7004-3p	0.84	0.738377		0.7	0.352968		1.23	0.630978		1.02	0.966748
m1050	mmu-miR-7004-5p	0.61	0.34498		0.74	0.600119	B	0.65	0.338477		0.81	0.764598	B
m1051	mmu-miR-7005-3p	0.85	0.89606	B	1.05	0.95441	B	2.28	0.471378	B	2.72	0.438961	B
m1052	mmu-miR-7005-5p	3.03	0.0650166		1.12	0.81181		3.09	0.048338		1.21	0.733035
m1053	mmu-miR-7006-5p	1.43	0.529624	B	1.15	0.714108	A	1.86	0.162946	B	1.53	0.341471	A
m1054	mmu-miR-7007-5p	0.81	0.816782	B	1.01	0.990129	B	0.61	0.633204	B	0.77	0.798504	B
m1055	mmu-miR-7008-5p	0.72	0.59079		1.18	0.680596		0.48	0.175882		0.87	0.781906
m1056	mmu-miR-7009-3p	0.66	0.425618	B	1.4	0.448235	B	0.58	0.219161	B	1.2	0.709334	B
m1057	mmu-miR-7009-5p	25.99	0.293561	B	14.83	0.559455	B	1	1	C	0.75	0.802386	B
m1058	mmu-miR-7010-5p	1.15	0.783743		1.25	0.608408	B	0.65	0.315881	A	0.72	0.46618	A
m1059	mmu-miR-7011-3p	1.51	0.434607		1.38	0.425684		0.95	0.898436		0.92	0.858688
m1060	mmu-miR-7011-5p	0.82	0.709624	B	1.49	0.414132	B	0.58	0.269553	B	1.05	0.927376	B
m1061	mmu-miR-7012-3p	2.07	0.152554	A	1.04	0.917049		2.09	0.100685	A	1.09	0.86003
m1062	mmu-miR-7012-5p	0.53	0.228719	A	1.06	0.897156		1.12	0.818919		2.41	0.109815	A
m1063	mmu-miR-7014-5p	0.9	0.8387		1.35	0.430624		0.66	0.31493		0.99	0.979954
m1064	mmu-miR-7015-3p	28.43	0.258183	B	13.59	0.578523	B	1	1	C	0.61	0.665958	B
m1065	mmu-miR-7015-5p	1.36	0.739842	B	1.09	0.942049	B	0.56	0.595375	B	0.47	0.471098	B
m1066	mmu-miR-7016-3p	0.47	0.297296	B	1.17	0.737714	B	0.95	0.911382	B	2.38	0.239915	B
m1067	mmu-miR-7016-5p	1.27	0.679025		1.38	0.411846		0.72	0.453399		0.81	0.683131
m1068	mmu-miR-7017-5p	2.4	0.141772		1.39	0.431732		1.06	0.889794		0.64	0.426002
m1069	mmu-miR-7018-3p	1.5	0.611562	B	0.88	0.745	B	2.93	0.032312	B	1.83	0.267201	B
m1070	mmu-miR-7018-5p	0.02	0.147636	B	0.54	0.593585	B	0.56	0.544828	B	11.88	0.489335	B
m1071	mmu-miR-7019-5p	0.86	0.799363	B	1.33	0.630475	B	0.67	0.512019	B	1.05	0.941712	B
m1072	mmu-miR-702-3p	1.92	0.214859	A	1.55	0.296057	B	1.18	0.764137	B	0.95	0.905347	A
m1073	mmu-miR-702-5p	1.36	0.61573	A	0.91	0.903738	B	0.86	0.831324	B	0.59	0.453313	A
m1074	mmu-miR-7020-5p	0.96	0.937513	B	1.35	0.453313	A	0.84	0.709445	B	1.17	0.723462	A
m1075	mmu-miR-7021-5p	2.53	0.155544	A	0.83	0.603768		3.66	0.00808146	A	1.25	0.676208
m1076	mmu-miR-7022-3p	2.4	0.272315		1.16	0.874057	B	0.17	0.0213594	A	0.08	0.00341617	A
m1077	mmu-miR-7022-5p	3.08	0.0475975	A	1.1	0.849385		3.67	0.0145993	A	1.38	0.581528
m1078	mmu-miR-7023-3p	3.74	0.0578911	A	14.31	0.554518	B	0.03	0.227482	B	0.12	0.0125444	A
m1079	mmu-miR-7023-5p	2.59	0.180992		0.94	0.934769		3.57	0.0591961		1.37	0.69958
m1080	mmu-miR-7025-3p	31.42	0.263475	B	4.88	0.870042	B	1	1	C	0.19	0.186831	B
m1081	mmu-miR-7025-5p	3.76	0.0137515	A	0.83	0.618545		2.58	0.0312474	A	0.57	0.237871
m1082	mmu-miR-7026-3p	3.15	0.102712		0.9	0.853099		5.58	0.00741968	A	1.7	0.411158
m1083	mmu-miR-7027-3p	1.79	0.547036	B	1.42	0.74419	B	0.74	0.807223	B	0.59	0.570101	B
m1084	mmu-miR-7027-5p	0.87	0.779944	A	0.89	0.878892	B	0.53	0.221691	A	0.58	0.392767	B
m1085	mmu-miR-7028-3p	0.55	0.366649	B	0.9	0.919869	B	0.3	0.135217	B	0.51	0.49051	B
m1086	mmu-miR-7028-5p	0.26	0.0894051	A	0.96	0.96939	B	0.12	0.00912761	A	0.38	0.41044	B
m1087	mmu-miR-7029-5p	0.82	0.734304	B	0.62	0.22896	B	1.51	0.345566	B	1.13	0.830985	B
m1088	mmu-miR-703	1.25	0.771621	B	0.64	0.668572	B	0.8	0.812698	B	0.41	0.353843	B
m1089	mmu-miR-7030-5p	0.49	0.190227		0.69	0.334819		0.7	0.439763		1.02	0.962547
m1090	mmu-miR-7031-3p	49.48	0.115943	B	2.33	0.974896	B	1	1	C	0.06	0.0206719	B
m1091	mmu-miR-7031-5p	1.5	0.560611	B	0.99	0.991657	B	1.52	0.561533	B	1.01	0.982614	B
m1092	mmu-miR-7032-3p	22.96	0.339277	B	12.36	0.611739	B	1	1	C	0.71	0.772625	B
m1093	mmu-miR-7032-5p	0.9	0.838531		0.97	0.938376	A	1.03	0.939516	A	1.08	0.854876
m1094	mmu-miR-7033-3p	5.84	0.106238	B	0.37	0.431108	B	3.35	0.344762	B	0.21	0.151416	B
m1095	mmu-miR-7033-5p	0.53	0.332308		0.76	0.492365		0.4	0.109403		0.56	0.283478
m1096	mmu-miR-7034-5p	2.29	0.133914		0.89	0.8244		2.98	0.0528536		1.19	0.77116
m1097	mmu-miR-7035-5p	1.15	0.787351	B	1.35	0.471676	B	0.99	0.979215	B	1.16	0.753603	B
m1098	mmu-miR-7036a-3p	0.91	0.847841		0.98	0.951685	A	1.16	0.7292	A	1.23	0.63633
m1099	mmu-miR-7036a-5p	1.3	0.735299	B	0.6	0.620226	B	0.91	0.92037	B	0.42	0.36656	B
m1100	mmu-miR-7036b-3p	0.74	0.746008	B	2.24	0.519022	B	0.17	0.125176	B	0.56	0.600292	B
m1101	mmu-miR-7036b-5p	0.88	0.799907		1.47	0.31475	A	0.82	0.64222	A	1.35	0.496637
m1102	mmu-miR-7037-3p	8.76	0.664571	B	1	1	C	1	1	C	0.12	0.695617	B
m1103	mmu-miR-7037-5p	0.54	0.401696	B	0.74	0.525686	B	1.13	0.777327	B	1.43	0.681605	B
m1104	mmu-miR-7038-5p	1.4	0.700833	B	1.1	0.931946	B	0.63	0.6706	B	0.52	0.509565	B
m1105	mmu-miR-7039-5p	1.99	0.184911	A	0.97	0.943068		2.06	0.156108	A	1.02	0.963357
m1106	mmu-miR-704	2.79	0.0895215		0.81	0.667848		4.09	0.010153		1.2	0.781579
m1107	mmu-miR-7040-5p	1.8	0.251104	A	1.34	0.458134	A	1.21	0.676793	B	0.93	0.862259
m1108	mmu-miR-7041-3p	0.54	0.331483	B	0.97	0.972931	B	0.53	0.270785	B	0.93	0.933559	B
m1109	mmu-miR-7042-3p	2.89	0.0589842	A	1.17	0.749364		4.03	0.00861354	A	1.7	0.381177
m1110	mmu-miR-7043-5p	17.76	0.402046	B	4.88	0.870042	B	1	1	C	0.34	0.387479	B
m1111	mmu-miR-7044-3p	2.11	0.171944		0.89	0.806963		2.52	0.0680341		1.11	0.853026
m1112	mmu-miR-7044-5p	3.17	0.0708464		1.03	0.962231		3.67	0.0402037		1.27	0.724097
m1113	mmu-miR-7045-3p	0.03	0.199681	B	0.28	0.316325	B	0.55	0.565192	B	4.88	0.744752	B
m1114	mmu-miR-7045-5p	0.73	0.545494		0.79	0.560857	A	0.75	0.525029	A	0.78	0.570074
m1115	mmu-miR-7046-3p	0.03	0.205206	B	0.89	0.928029	B	0.4	0.395152	B	11.88	0.489335	B
m1116	mmu-miR-7046-5p	1.14	0.818128	A	0.72	0.392921	B	1.5	0.346223	B	0.94	0.905548	A
m1117	mmu-miR-7047-3p	0.82	0.694026	B	1.19	0.675297	B	0.84	0.682624	B	1.24	0.664593	B
m1118	mmu-miR-7047-5p	0.87	0.803447	B	1.25	0.608124	B	0.86	0.740538	B	1.21	0.706537	B
m1119	mmu-miR-7048-3p	1.95	0.196411	A	1.22	0.63329		2.44	0.0530148	A	1.55	0.339999
m1120	mmu-miR-7048-5p	0.1	0.0357653	B	0.72	0.557749	B	1.06	0.904774	B	7.16	0.10446	B
m1121	mmu-miR-7049-3p	37.22	0.207013	B	12.36	0.611739	B	1	1	C	0.44	0.482119	B
m1122	mmu-miR-7049-5p	0.59	0.306267		0.97	0.929557		0.86	0.726915		1.35	0.515501
m1123	mmu-miR-705	0.06	0.406577	B	0.67	0.736162	B	1.08	0.94906	B	13.02	0.471251	B
m1124	mmu-miR-7050-5p	1.6	0.352207		1.81	0.11735	A	1.01	0.985495		1.2	0.699485
m1125	mmu-miR-7051-5p	2.87	0.252808	B	4.13	0.127598	B	0.86	0.900315	B	1.19	0.795592	B
m1126	mmu-miR-7052-5p	0.52	0.221535		0.9	0.798751	B	0.42	0.0870147	A	0.77	0.575818	A
m1127	mmu-miR-7055-5p	2.73	0.05673	A	1.27	0.525659	A	2.26	0.0827043	B	1.08	0.863348
m1128	mmu-miR-7056-5p	0.73	0.547953	B	0.86	0.694128	A	1.37	0.466581	B	1.58	0.327348	A
m1129	mmu-miR-7057-3p	1.72	0.561969	B	1.55	0.684152	B	0.59	0.630504	B	0.57	0.574317	B
m1130	mmu-miR-7057-5p	0.78	0.624352		0.67	0.280871		1.43	0.395606		1.18	0.710264
m1131	mmu-miR-7058-5p	2.2	0.207009	A	0.87	0.891469	B	0.77	0.782567	B	0.33	0.128754	A
m1132	mmu-miR-7059-5p	0.57	0.675207	B	2.25	0.526871	B	1.59	0.705089	B	6.11	0.180728	B
m1133	mmu-miR-706	2.93	0.0454059	A	1.1	0.792147		2.51	0.0360541	A	0.96	0.927226
m1134	mmu-miR-7060-5p	0.01	0.00466034	A	0.71	0.804269	B	0.04	0.00286484	A	4.88	0.744752	B
m1135	mmu-miR-7062-5p	0.04	0.353426	B	0.23	0.265261	B	0.51	0.571077	B	2.39	0.921973	B
m1136	mmu-miR-7063-5p	0.02	0.151072	B	0.28	0.316325	B	0.44	0.423902	B	4.88	0.744752	B
m1137	mmu-miR-7065-3p	3.15	0.0512077	A	1.81	0.162505	A	1.41	0.465866	B	0.87	0.787193
m1138	mmu-miR-7065-5p	3.02	0.186955	B	1.54	0.699758	B	0.68	0.736142	B	0.38	0.280214	B
m1139	mmu-miR-7066-5p	0.42	0.09251	A	2.52	0.0234792	A	0.39	0.0316306	A	2.36	0.0614905	A
m1140	mmu-miR-7067-3p	2.43	0.158134		1.01	0.991239		2.74	0.116427		1.18	0.817679
m1141	mmu-miR-7067-5p	0.65	0.392156		1.75	0.153017	A	0.43	0.0521581	A	1.16	0.73954
m1142	mmu-miR-7068-3p	1.33	0.607696	B	0.66	0.297899	B	1.83	0.163826	B	0.91	0.858561	B
m1143	mmu-miR-7069-3p	1.19	0.820185	B	0.96	0.949879	B	1.02	0.980362	B	0.87	0.857685	B
m1144	mmu-miR-7069-5p	1.82	0.286595		0.96	0.933837		1.92	0.154568		1.05	0.925106
m1145	mmu-miR-707	4.2	0.0551542		1.04	0.955498		3.54	0.0846854		0.95	0.946062
m1146	mmu-miR-7070-3p	0.63	0.448511	B	1.15	0.732613	B	0.96	0.931286	B	1.78	0.308331	B
m1147	mmu-miR-7070-5p	0.03	0.221044	B	0.28	0.277559	B	1.03	0.979469	B	8.42	0.573184	B
m1148	mmu-miR-7071-3p	0.73	0.629156	B	0.9	0.775784	B	1.8	0.176594	B	2.17	0.155455	B
m1149	mmu-miR-7071-5p	0.91	0.855324	B	0.75	0.568631	B	0.77	0.545387	B	0.64	0.407781	B
m1150	mmu-miR-7072-3p	0.57	0.293478	B	2.01	0.52562	B	0.18	0.0129977	B	0.63	0.582475	B
m1151	mmu-miR-7072-5p	15.97	0.439296	B	2.33	0.974896	B	1	1	C	0.18	0.175855	B
m1152	mmu-miR-7073-3p	2.88	0.287057	B	9.22	0.0592562	B	0.21	0.218198	B	0.74	0.72331	B
m1153	mmu-miR-7073-5p	1.3	0.594572	A	1.41	0.356043	A	1.16	0.727523	B	1.29	0.568187
m1154	mmu-miR-7074-5p	2.18	0.123853	A	1.06	0.883627	B	1.16	0.728204	B	0.59	0.23387	A
m1155	mmu-miR-7076-5p	13.93	0.488478	B	1	1	C	1	1	C	0.08	0.532536	B
m1156	mmu-miR-7077-3p	1.92	0.404542	B	1.1	0.808059	B	2.77	0.0611357	B	1.72	0.283116	B
m1157	mmu-miR-7078-5p	0.96	0.936535	B	0.71	0.443724	B	1.23	0.653882	B	0.9	0.854973	B
m1158	mmu-miR-7079-5p	0.25	0.294249	B	2.35	0.509342	B	0.47	0.54277	B	4.04	0.288924	B
m1159	mmu-miR-708-5p	1.03	0.953945	B	0.84	0.793076	B	0.57	0.259721	B	0.45	0.160324	B
m1160	mmu-miR-7080-3p	1.6	0.524991	B	1.99	0.254751	B	0.93	0.940826	B	1.2	0.759175	B
m1161	mmu-miR-7080-5p	1.11	0.852822		1.01	0.99028		1.54	0.346835		1.43	0.533707
m1162	mmu-miR-7081-5p	2.19	0.354899	B	4.27	0.0745876	B	0.65	0.717057	B	1.22	0.742577	B
m1163	mmu-miR-7082-3p	1.1	0.867718		1	0.994118		1.17	0.734709		1.1	0.863894
m1164	mmu-miR-7082-5p	0.65	0.540298	B	1.11	0.909662	B	0.48	0.35235	B	0.84	0.852774	B
m1165	mmu-miR-7083-5p	0.05	0.38307	B	0.31	0.366114	B	0.43	0.466101	B	2.39	0.921973	B
m1166	mmu-miR-7084-3p	0.95	0.920622		1.75	0.195486	B	0.52	0.153717		0.97	0.944456	A
m1167	mmu-miR-7084-5p	71.75	0.0318276	B	9.88	0.686387	B	1	1	C	0.18	0.0825783	B
m1168	mmu-miR-7085-5p	0.04	0.27771	B	0.1	0.0552594	B	2.1	0.43816	B	4.88	0.744752	B
m1169	mmu-miR-7087-5p	0.49	0.158536	A	0.77	0.485967		0.92	0.83931		1.43	0.421855	A
m1170	mmu-miR-7088-5p	1.9	0.558631	B	2.08	0.563633	B	0.59	0.671959	B	0.64	0.671211	B
m1171	mmu-miR-7089-5p	0.98	0.95994		1.22	0.593966	A	1.25	0.598339	A	1.57	0.317311
m1172	mmu-miR-709	0.53	0.630636	B	0.97	0.977248	B	1.11	0.933014	B	1.88	0.632185	B
m1173	mmu-miR-7090-3p	3.12	0.0746676		1.19	0.82375		4.29	0.0324246		1.63	0.584553
m1174	mmu-miR-7090-5p	0.68	0.701628	B	0.78	0.626354	B	2.47	0.0707866	B	2.9	0.25095	B
m1175	mmu-miR-7091-3p	1.13	0.842556	B	0.98	0.970272	B	1.12	0.823637	B	0.98	0.978322	B
m1176	mmu-miR-7091-5p	35.84	0.191951	B	4.88	0.870042	B	1	1	C	0.17	0.134295	B
m1177	mmu-miR-7092-3p	14.43	0.478972	B	2.33	0.974896	B	1	1	C	0.2	0.204364	B
m1178	mmu-miR-7092-5p	1.5	0.493046	B	0.68	0.463025	B	1.38	0.534698	B	0.62	0.419704	B
m1179	mmu-miR-7094-1-5p	0.88	0.871553	B	2.19	0.428747	B	0.37	0.338145	B	0.96	0.966937	B
m1180	mmu-miR-7094b-2-5p	2.16	0.156829	A	1.05	0.916808	A	2.02	0.181814	B	1	0.99558
m1181	mmu-miR-711	0.32	0.0880723	B	0.66	0.643688	B	0.32	0.0509488	B	0.66	0.674927	B
m1182	mmu-miR-7115-3p	35.73	0.249088	B	12.36	0.611739	B	1	1	C	0.46	0.528221	B
m1183	mmu-miR-7115-5p	1.11	0.833806	A	0.95	0.890861	B	1.21	0.6646	B	1.01	0.976222	A
m1184	mmu-miR-7116-3p	38.72	0.182864	B	11.12	0.647612	B	1	1	C	0.38	0.396422	B
m1185	mmu-miR-7116-5p	2.04	0.194058		0.94	0.88533		2.81	0.0270063		1.29	0.632385
m1186	mmu-miR-7117-3p	0.04	0.264201	B	0.86	0.899006	B	0.6	0.638279	B	14.16	0.455267	B
m1187	mmu-miR-7117-5p	0.91	0.907395	B	0.94	0.952917	B	0.67	0.674912	B	0.71	0.730107	B
m1188	mmu-miR-7118-3p	0.89	0.824286	B	0.77	0.536565	B	0.99	0.985305	B	0.85	0.759235	B
m1189	mmu-miR-7118-5p	2.31	0.110233	A	1.49	0.288689	A	1.91	0.156805	B	1.28	0.585868
m1190	mmu-miR-7119-3p	2.19	0.17421	B	1.15	0.741026	A	2.4	0.0939317	B	1.36	0.490349	A
m1191	mmu-miR-712-3p	0.84	0.732861		0.95	0.897172	A	0.76	0.526073	A	0.85	0.706281
m1192	mmu-miR-712-5p	1.45	0.468031		1.25	0.55445		1.22	0.644991		1.06	0.903618
m1193	mmu-miR-714	0.49	0.210364		1.04	0.918823		0.48	0.105764		1.02	0.960123
m1194	mmu-miR-717	0.84	0.777152	B	2.41	0.327823	B	0.26	0.099129	B	0.79	0.746827	B
m1195	mmu-miR-718	1.05	0.923044		0.71	0.36403		0.75	0.497204		0.52	0.162238
m1196	mmu-miR-721	1.9	0.26988	B	1.36	0.532033	B	1.18	0.789535	B	0.87	0.780306	B
m1197	mmu-miR-7210-5p	1.63	0.331709	A	0.83	0.610517		2.27	0.0593907	A	1.14	0.780167
m1198	mmu-miR-7211-3p	0.53	0.290103		1.18	0.712542	B	0.22	0.0111533	A	0.49	0.158668	A
m1199	mmu-miR-7211-5p	1.22	0.723677		1.53	0.302991		0.85	0.702118		1.12	0.832131
m1200	mmu-miR-7212-3p	0.01	0.0239248	B	0.86	0.895351	B	0.24	0.0703009	B	16.44	0.428141	B
m1201	mmu-miR-7212-5p	0.93	0.89077	B	1	0.994678	B	0.64	0.395889	B	0.7	0.564271	B
m1202	mmu-miR-7213-3p	0.08	0.521971	B	0.1	0.088892	B	3.23	0.367613	B	3.66	0.825669	B
m1203	mmu-miR-7214-5p	0.66	0.571608	B	1.34	0.761172	B	0.43	0.322478	B	0.91	0.916967	B
m1204	mmu-miR-7215-5p	1.83	0.270055		0.88	0.764861		1.94	0.131208		0.95	0.921048
m1205	mmu-miR-7216-3p	0.81	0.740028	B	1.18	0.825135	B	0.63	0.495309	B	0.92	0.909839	B
m1206	mmu-miR-7216-5p	1.62	0.370842		1.42	0.357692		1.06	0.883402		0.96	0.928417
m1207	mmu-miR-7217-3p	0.06	0.418212	B	0.04	0.0023123	A	13.9	0.0144805	A	6.08	0.678228	B
m1208	mmu-miR-7218-5p	1.04	0.945797	B	1.46	0.445015	B	0.92	0.893787	B	1.36	0.567695	B
m1209	mmu-miR-7219-5p	3.25	0.0740446	A	3.35	0.197181	B	0.4	0.416901	B	0.48	0.29925	A
m1210	mmu-miR-7220-3p	0.71	0.488382		1.16	0.698861	A	0.76	0.519963	A	1.26	0.60511
m1211	mmu-miR-7220-5p	2.18	0.200281		1.62	0.35523		1.35	0.568464		1.09	0.881319
m1212	mmu-miR-7221-3p	0.47	0.199195	A	1.51	0.587711	B	0.3	0.0133297	A	0.98	0.975815	B
m1213	mmu-miR-7221-5p	0.03	0.213581	B	2.54	0.458778	B	0.17	0.131055	B	14.16	0.455267	B
m1214	mmu-miR-7222-3p	42	0.151698	B	13.59	0.578523	B	1	1	C	0.43	0.441889	B
m1215	mmu-miR-7222-5p	6.31	0.0421724		0.9	0.835267		1.36	0.533583		0.2	0.0496548
m1216	mmu-miR-7223-3p	3	0.229886	B	0.92	0.942375	B	1.08	0.947919	B	0.38	0.30145	B
m1217	mmu-miR-7223-5p	0.94	0.918952	B	0.81	0.645899	B	1.11	0.824992	B	0.95	0.926138	B
m1218	mmu-miR-7225-5p	1.39	0.526434	A	1.44	0.334023	A	1.47	0.394652	B	1.49	0.379
m1219	mmu-miR-7226-3p	3.93	0.0347135	A	1.42	0.377601	A	2.81	0.140164	B	1.11	0.818007
m1220	mmu-miR-7226-5p	0.84	0.732202	B	0.82	0.605425	A	1.48	0.387272	B	1.39	0.45802	A
m1221	mmu-miR-7227-3p	0.81	0.671433		1.21	0.626452	A	0.91	0.833119	A	1.33	0.522771
m1222	mmu-miR-7227-5p	1.39	0.563738	B	0.96	0.917422	A	2.2	0.0738018	B	1.46	0.391321	A
m1223	mmu-miR-7228-5p	4.32	0.27968	B	1.13	0.902262	B	5.28	0.196036	B	1.3	0.831999	B
m1224	mmu-miR-7232-3p	8.19	0.0332214	B	0.81	0.779407	B	5.93	0.139543	B	0.61	0.46452	B
m1225	mmu-miR-7234-5p	34.34	0.204459	B	4.88	0.870042	B	1	1	C	0.18	0.147107	B
m1226	mmu-miR-7235-5p	0.73	0.584882	B	0.69	0.424642	B	1.14	0.771509	B	1.08	0.908789	B
m1227	mmu-miR-7237-3p	0.04	0.000813054	A	0.88	0.797237	B	0.04	0.000556339	A	0.87	0.809789	B
m1228	mmu-miR-7237-5p	1.2	0.709072		1.66	0.218509	A	0.61	0.273838	A	0.9	0.804686
m1229	mmu-miR-7238-3p	8.99	0.66144	B	3.61	0.923845	B	1	1	C	0.51	0.590197	B
m1230	mmu-miR-7238-5p	28.06	0.267006	B	13.59	0.578523	B	1	1	C	0.63	0.691291	B
m1231	mmu-miR-7239-3p	3.03	0.0965872		0.98	0.973545		4.07	0.0468084		1.41	0.653114
m1232	mmu-miR-7239-5p	0.06	0.448069	B	1.78	0.640455	B	0.25	0.271977	B	7.25	0.622995	B
m1233	mmu-miR-7240-5p	0.71	0.507934		1.37	0.446279	A	0.67	0.335989	A	1.27	0.613276
m1234	mmu-miR-7241-5p	0.66	0.574569	B	1.52	0.697093	B	0.23	0.133597	B	0.57	0.554635	B
m1235	mmu-miR-7242-3p	1.68	0.441184	B	0.86	0.769712	B	1.66	0.460998	B	0.83	0.758247	B
m1236	mmu-miR-7242-5p	0.03	0.209592	B	0.38	0.435153	B	0.8	0.827851	B	9.58	0.534078	B
m1237	mmu-miR-7243-5p	0.05	0.370746	B	1.73	0.660097	B	0.29	0.294076	B	9.58	0.534078	B
m1238	mmu-miR-741-5p	11.32	0.0134662	A	2.67	0.41432	B	0.12	0.0358103	B	0.03	0.00379863	A
m1239	mmu-miR-742-3p	1.56	0.425256	B	1.34	0.508113	B	1.14	0.820588	B	1	0.995544	B
m1240	mmu-miR-742-5p	21.87	0.337472	B	13.59	0.578523	B	1	1	C	0.81	0.853422	B
m1241	mmu-miR-743a-3p	1.33	0.654026	B	0.89	0.806867	B	1.43	0.523661	B	0.97	0.959721	B
m1242	mmu-miR-743b-5p	53.88	0.0897968	B	9.88	0.686387	B	1	1	C	0.24	0.194882	B
m1243	mmu-miR-744-3p	1.44	0.46165	A	1.03	0.936613	A	1.46	0.37625	B	1.05	0.918393
m1244	mmu-miR-744-5p	0.51	0.19396	A	1.9	0.401509	B	0.26	0.00619439	A	0.96	0.952076	B
m1245	mmu-miR-758-3p	1.86	0.291066	B	0.93	0.859179	B	1.99	0.161984	B	1.01	0.987419	B
m1246	mmu-miR-758-5p	1.34	0.697988	B	1.9	0.461894	B	0.68	0.709423	B	0.96	0.95424	B
m1247	mmu-miR-759	38.43	0.18152	B	28.55	0.382365	B	1	1	C	0.99	0.98996	B
m1248	mmu-miR-760-3p	0.73	0.567497		1.15	0.717262		0.7	0.402438		1.07	0.887921
m1249	mmu-miR-760-5p	0.87	0.785694	B	1.21	0.62935	B	0.97	0.941288	B	1.32	0.550578	B
m1250	mmu-miR-762	0.02	0.108648	B	0.5	0.545934	B	0.56	0.513484	B	13.02	0.471251	B
m1251	mmu-miR-763	0.75	0.759779	B	1.07	0.953751	B	0.5	0.507336	B	0.73	0.778591	B
m1252	mmu-miR-7646-3p	2.49	0.152588	A	1.28	0.579959	B	1.68	0.411904	B	0.95	0.919083	A
m1253	mmu-miR-7648-3p	0.38	0.130543		0.87	0.735186	B	0.17	0.0047144	A	0.39	0.0655083	A
m1254	mmu-miR-7648-5p	3.06	0.151905		0.93	0.927604		3.68	0.0754388		1.18	0.857703
m1255	mmu-miR-7649-5p	8.44	0.038114	B	1.33	0.757892	B	3.53	0.301723	B	0.56	0.448832	B
m1256	mmu-miR-7650-3p	0.17	0.136753	B	0.68	0.485816	B	2.01	0.232906	B	7.94	0.085128	B
m1257	mmu-miR-7650-5p	0.46	0.292421	A	1.24	0.770983	B	0.2	0.0126267	A	0.53	0.481297	B
m1258	mmu-miR-7651-3p	1.15	0.915221	B	0.2	0.0130296	B	12.37	0.00324483	B	1.93	0.593293	B
m1259	mmu-miR-7651-5p	1.14	0.87953	B	1.42	0.74793	B	0.38	0.37993	B	0.5	0.480423	B
m1260	mmu-miR-7652-3p	7.41	0.157447	B	1.04	0.971529	B	7.62	0.112752	B	1.11	0.933184	B
m1261	mmu-miR-7652-5p	0.86	0.755186		0.55	0.117955		1.48	0.360262		0.95	0.907412
m1262	mmu-miR-7653-3p	1.68	0.391229		1.08	0.873631		1.24	0.653462		0.82	0.73075
m1263	mmu-miR-7653-5p	1.5	0.424231		0.84	0.639851		1.3	0.541068		0.74	0.502117
m1264	mmu-miR-7654-3p	0.66	0.464106		0.84	0.653714		0.55	0.174961		0.67	0.409698
m1265	mmu-miR-7654-5p	1.11	0.836297	A	1.27	0.53282	A	1.1	0.831578	B	1.26	0.595204
m1266	mmu-miR-7655-3p	0.52	0.284437	B	1.1	0.865538	B	0.64	0.381695	B	1.44	0.637095	B
m1267	mmu-miR-7655-5p	1.39	0.50376		0.77	0.534449	B	0.96	0.921222	A	0.53	0.171612	A
m1268	mmu-miR-7656-3p	3.82	0.0486242		1.13	0.847912		3.23	0.0597061		1.02	0.981102
m1269	mmu-miR-7656-5p	2.43	0.119023		1.39	0.458154		1.94	0.13599		1.14	0.808654
m1270	mmu-miR-7657-3p	1.03	0.976434	B	1.41	0.74418	B	0.42	0.416852	B	0.61	0.622872	B
m1271	mmu-miR-7658-3p	0.89	0.831875		1.35	0.440358		0.75	0.494045		1.11	0.834255
m1272	mmu-miR-7658-5p	0.74	0.553388		1.03	0.940304	A	0.76	0.514247	A	1.05	0.919933
m1273	mmu-miR-7659-3p	10.58	0.604272	B	8.63	0.728309	B	1	1	C	1.05	0.967687	B
m1274	mmu-miR-7659-5p	0.66	0.44378	B	0.84	0.663583	B	1.05	0.901386	B	1.33	0.59247	B
m1275	mmu-miR-7660-5p	1.17	0.762996		1.1	0.817783	B	0.59	0.212778	A	0.54	0.202087	A
m1276	mmu-miR-7662-3p	1.85	0.304445		1.26	0.620747		1.5	0.396708		1.05	0.933028
m1277	mmu-miR-7663-5p	0.88	0.856757	B	0.94	0.918453	B	0.97	0.958848	B	1.06	0.931863	B
m1278	mmu-miR-7664-3p	1.21	0.705808		1	0.996042		1.37	0.463798		1.09	0.85067
m1279	mmu-miR-7664-5p	1.04	0.941941	B	0.84	0.70791	B	1.16	0.730712	B	0.92	0.887655	B
m1280	mmu-miR-7665-3p	0.02	0.125829	B	0.92	0.953284	B	0.22	0.161174	B	9.58	0.534078	B
m1281	mmu-miR-7665-5p	33.06	0.238922	B	9.88	0.686387	B	1	1	C	0.39	0.430921	B
m1282	mmu-miR-7666-3p	1.04	0.957213	B	2.85	0.26441	B	0.33	0.242416	B	0.95	0.95388	B
m1283	mmu-miR-7666-5p	1.07	0.886337		0.93	0.839464		1.15	0.737596		0.99	0.98667
m1284	mmu-miR-7667-5p	0.05	0.356174	B	0.8	0.855355	B	0.81	0.851805	B	13.02	0.471251	B
m1285	mmu-miR-7669-3p	2.47	0.122949		1.17	0.710473		1.48	0.373001		0.74	0.577852
m1286	mmu-miR-7669-5p	0.25	0.315172	B	2.82	0.421471	B	0.74	0.812212	B	7.71	0.135302	B
m1287	mmu-miR-767	0.94	0.934784	B	0.76	0.809881	B	0.45	0.395775	B	0.38	0.335598	B
m1288	mmu-miR-7670-3p	55.09	0.0792369	B	4.88	0.870042	B	1	1	C	0.11	0.0561217	B
m1289	mmu-miR-7670-5p	0.95	0.926215		1.64	0.36011	B	0.48	0.166783		0.83	0.710431	B
m1290	mmu-miR-7671-3p	0.89	0.882839	B	1.12	0.912018	B	0.45	0.441969	B	0.59	0.602649	B
m1291	mmu-miR-7671-5p	0.58	0.28975	A	1.25	0.632787	B	0.51	0.118124	A	1.1	0.853356	B
m1292	mmu-miR-7672-5p	1.28	0.645141		1.15	0.706821		1.01	0.978727		0.94	0.896981
m1293	mmu-miR-7673-3p	1.92	0.200897	A	1.14	0.719531	A	1.99	0.114399	B	1.19	0.702668
m1294	mmu-miR-7673-5p	0.7	0.494612	B	1.4	0.434035	B	0.65	0.334263	B	1.3	0.598464	B
m1295	mmu-miR-7674-3p	2.51	0.0795612		1.25	0.575054	A	0.96	0.927813	A	0.5	0.144601
m1296	mmu-miR-7674-5p	1.13	0.8696	B	5.19	0.207579	B	0.08	0.034397	B	0.41	0.372237	B
m1297	mmu-miR-7675-3p	0.34	0.407955	B	1.89	0.556967	B	0.7	0.758344	B	3.49	0.354193	B
m1298	mmu-miR-7675-5p	0.69	0.548557	B	0.97	0.938558	B	1.05	0.925403	B	1.37	0.589666	B
m1299	mmu-miR-7676-3p	0.06	0.437419	B	0.85	0.90327	B	0.66	0.726116	B	9.58	0.534078	B
m1300	mmu-miR-7676-5p	31.35	0.232389	B	3.61	0.923845	B	1	1	C	0.14	0.117866	B
m1301	mmu-miR-7677-3p	0.21	0.182526	B	1.68	0.681674	B	0.18	0.134705	B	1.45	0.762456	B
m1302	mmu-miR-7677-5p	0.48	0.384917	B	1.2	0.853745	B	0.5	0.420298	B	1.3	0.803784	B
m1303	mmu-miR-7678-3p	8.87	0.124962	B	1.03	0.97091	B	14.59	0.0370681	B	1.76	0.611996	B
m1304	mmu-miR-7678-5p	0.05	0.354	B	1.7	0.662399	B	0.47	0.518317	B	16.44	0.428141	B
m1305	mmu-miR-7679-5p	3.79	0.0306349	A	0.89	0.759333		5.14	0.00178354	A	1.23	0.702622
m1306	mmu-miR-7680-5p	1.63	0.329697	A	1.38	0.397811	A	1.16	0.722306	B	1.02	0.97176
m1307	mmu-miR-7681-3p	0.03	0.182865	B	0.47	0.550038	B	0.38	0.356856	B	6.08	0.678228	B
m1308	mmu-miR-7681-5p	0.02	0.0684052	B	0.4	0.476396	B	0.29	0.198108	B	7.25	0.622995	B
m1309	mmu-miR-7682-3p	0.03	0.208004	B	0.19	0.163091	B	1.22	0.845852	B	7.25	0.622995	B
m1310	mmu-miR-7682-5p	0.04	0.295823	B	0.26	0.283491	B	1.05	0.961979	B	6.08	0.678228	B
m1311	mmu-miR-7683-3p	1.18	0.809435	B	1.35	0.578571	B	0.96	0.961963	B	1.05	0.934433	B
m1312	mmu-miR-7683-5p	0.75	0.610625	B	0.75	0.518479	B	1.03	0.941146	B	1.05	0.933161	B
m1313	mmu-miR-7684-3p	0.02	0.0782139	B	0.59	0.644394	B	0.36	0.264764	B	13.02	0.471251	B
m1314	mmu-miR-7685-3p	0.93	0.930863	B	0.52	0.462974	B	1.32	0.740442	B	0.73	0.761406	B
m1315	mmu-miR-7685-5p	0.01	0.00234189	A	0.42	0.483654	B	0.17	0.0179884	A	8.42	0.573184	B
m1316	mmu-miR-7686-3p	2.12	0.164769		0.7	0.440796		2.47	0.0785364		0.85	0.755095
m1317	mmu-miR-7686-5p	0.22	0.105272	B	0.5	0.190368	B	1.07	0.88159	B	2.24	0.483796	B
m1318	mmu-miR-7687-3p	0.29	0.247785	B	0.88	0.804756	B	1.62	0.346457	B	4.84	0.130345	B
m1319	mmu-miR-7687-5p	25.71	0.286678	B	7.38	0.773576	B	1	1	C	0.37	0.398386	B
m1320	mmu-miR-7688-3p	0.04	0.271701	B	0.79	0.846354	B	0.63	0.667828	B	13.02	0.471251	B
m1321	mmu-miR-7688-5p	2.91	0.170387	B	0.67	0.699913	B	1.39	0.766405	B	0.34	0.200194	B
m1322	mmu-miR-7689-3p	2	0.192896	A	1.71	0.157422	A	1.41	0.421995	B	1.25	0.633671
m1323	mmu-miR-7689-5p	42.62	0.14154	B	21	0.490482	B	1	1	C	0.65	0.670751	B
m1324	mmu-miR-770-3p	1.02	0.968748		1.15	0.720121	B	0.87	0.740085	A	1	0.990638	A
m1325	mmu-miR-770-5p	1.14	0.805686	A	1.74	0.250739	B	0.54	0.213292	B	0.84	0.728975	A
m1326	mmu-miR-7a-2-3p	312.7	0.00187729	A	9.88	0.686387	B	1	1	C	0.04	0.00443364	A
m1327	mmu-miR-7a-5p	0.52	0.231325		1.8	0.122292	A	0.32	0.00890443	A	1.14	0.781654
m1328	mmu-miR-7b-3p	0.04	0.00407203	B	1.15	0.787725	B	0.86	0.763553	B	23.29	0.00620305	B
m1329	mmu-miR-7b-5p	0.71	0.494345	A	1.47	0.329148	A	0.61	0.251694	A	1.27	0.588755	A
m1330	mmu-miR-802-5p	0.03	0.163089	B	0.78	0.823091	B	0.64	0.654184	B	18.7	0.405819	B
m1331	mmu-miR-804	0.06	0.422507	B	1.68	0.676963	B	0.42	0.474727	B	11.88	0.489335	B
m1332	mmu-miR-8090	5.96	0.205627	B	1.46	0.684597	B	7.02	0.126252	B	1.78	0.635031	B
m1333	mmu-miR-8091	0.91	0.863806	B	0.6	0.307556	B	1.06	0.896417	B	0.69	0.549505	B
m1334	mmu-miR-8092	0.78	0.6368	B	0.66	0.274026	B	1.36	0.477168	B	1.14	0.784065	B
m1335	mmu-miR-8093	0.32	0.378477	B	1.07	0.958585	B	0.64	0.714428	B	1.9	0.615045	B
m1336	mmu-miR-8094	1.56	0.405572		1.37	0.423658		1.25	0.592197		1.12	0.824224
m1337	mmu-miR-8095	0.14	0.723569	B	0.67	0.764489	B	1.28	0.846577	B	6.08	0.678228	B
m1338	mmu-miR-8096	0.08	0.503801	B	0.15	0.108026	B	3.52	0.275872	B	6.08	0.678228	B
m1339	mmu-miR-8097	38.14	0.180989	B	13.59	0.578523	B	1	1	C	0.47	0.500615	B
m1340	mmu-miR-8098	0.81	0.721806	B	1.75	0.240865	B	0.66	0.461449	B	1.5	0.450362	B
m1341	mmu-miR-8099	1.02	0.96785		1.24	0.561748	A	0.82	0.645339	A	1.02	0.967378
m1342	mmu-miR-8101	0.9	0.84241		1.68	0.171827	A	0.62	0.269377	A	1.14	0.771495
m1343	mmu-miR-8102	1.37	0.534767	A	0.94	0.881006	A	1.32	0.520454	B	0.91	0.821273
m1344	mmu-miR-8103	0.03	0.21532	B	0.19	0.134134	B	1.68	0.563631	B	9.58	0.534078	B
m1345	mmu-miR-8104	1.59	0.39849		1.32	0.477218		1.07	0.87959		0.91	0.859282
m1346	mmu-miR-8105	0.54	0.249778		1.45	0.329393	A	0.5	0.106123	A	1.32	0.547736
m1347	mmu-miR-8107	1.3	0.638867	B	0.89	0.810726	B	1.16	0.762751	B	0.79	0.649064	B
m1348	mmu-miR-8108	0.13	0.0135287	A	0.48	0.190012	B	0.78	0.569691	A	2.57	0.417566	B
m1349	mmu-miR-8109	0.56	0.330144		0.95	0.908373		0.49	0.139594		0.83	0.720347
m1350	mmu-miR-8110	19.27	0.378655	B	3.61	0.923845	B	1	1	C	0.23	0.241116	B
m1351	mmu-miR-8111	0.02	0.056737	B	0.47	0.550038	B	0.23	0.0937935	B	6.08	0.678228	B
m1352	mmu-miR-8112	1.37	0.535962		0.57	0.180785	B	0.82	0.649897	A	0.34	0.0295979	A
m1353	mmu-miR-8113	2.32	0.341746	B	0.59	0.560376	B	1.96	0.505497	B	0.53	0.472073	B
m1354	mmu-miR-8114	0.21	0.0277882	A	2.7	0.365173	B	0.05	0.00141742	A	0.59	0.551365	B
m1355	mmu-miR-8115	5.35	0.0139092	A	1.33	0.583578	B	2.16	0.422387	B	0.55	0.234536	A
m1356	mmu-miR-8116	0.56	0.254529	A	1.49	0.302314	A	0.56	0.17656	A	1.51	0.356694	A
m1357	mmu-miR-8117	0.87	0.811158		0.46	0.0717436		0.97	0.943066		0.51	0.166464
m1358	mmu-miR-8118	28.72	0.253163	B	7.38	0.773576	B	1	1	C	0.33	0.335716	B
m1359	mmu-miR-8119	0.96	0.93046		1.39	0.38161	A	0.79	0.57184	A	1.19	0.697804
m1360	mmu-miR-8120	0.55	0.251977		0.93	0.841718		0.72	0.440135		1.16	0.746114
m1361	mmu-miR-871-3p	0.03	0.254841	B	1.04	0.96578	B	0.33	0.329907	B	9.58	0.534078	B
m1362	mmu-miR-871-5p	0.09	0.541382	B	0.23	0.254426	B	1.99	0.587787	B	4.88	0.744752	B
m1363	mmu-miR-872-3p	0.45	0.464846	B	8.59	0.00913204	A	1.81	0.365217	B	36.15	0.00602234	A
m1364	mmu-miR-872-5p	0.83	0.729345	B	0.79	0.712879	B	0.7	0.45461	B	0.67	0.562213	B
m1365	mmu-miR-873b	1.42	0.596055	B	1.06	0.894178	B	1.55	0.437041	B	1.2	0.734312	B
m1366	mmu-miR-874-3p	0.25	0.0318879		0.81	0.590961		0.35	0.0628498		1.15	0.777104
m1367	mmu-miR-874-5p	0.55	0.417606	B	0.69	0.730767	B	0.43	0.30688	B	0.57	0.594357	B
m1368	mmu-miR-875-3p	10.16	0.0306763	B	0.99	0.988283	B	6.96	0.124313	B	0.69	0.584887	B
m1369	mmu-miR-875-5p	1.56	0.478306	B	0.95	0.909305	B	1.67	0.308175	B	1.02	0.962056	B
m1370	mmu-miR-876-5p	3.02	0.0579232	A	1.38	0.531037		3.09	0.0234379	A	1.41	0.602152
m1371	mmu-miR-877-3p	0.83	0.699124		0.69	0.374599	B	0.8	0.5945	A	0.66	0.379963	A
m1372	mmu-miR-877-5p	0.03	0.20469	B	0.8	0.866647	B	0.27	0.24441	B	7.25	0.622995	B
m1373	mmu-miR-878-3p	2.26	0.436811	B	1.95	0.572218	B	0.57	0.639779	B	0.53	0.542938	B
m1374	mmu-miR-878-5p	0.98	0.965569	A	0.8	0.568915	B	1.19	0.681939	B	0.98	0.960674	A
m1375	mmu-miR-879-3p	1.29	0.621151	B	1.14	0.760359	B	1.22	0.663367	B	1.05	0.931628	B
m1376	mmu-miR-879-5p	0.89	0.852417	B	0.53	0.164558	B	1.57	0.317292	B	0.93	0.916376	B
m1377	mmu-miR-880-3p	2.2	0.152784	A	0.77	0.487777		2.54	0.0556014	A	0.96	0.927653
m1378	mmu-miR-883a-3p	0.03	0.176716	B	0.59	0.671364	B	0.38	0.359959	B	8.42	0.573184	B
m1379	mmu-miR-883a-5p	0.05	0.34766	B	0.28	0.334036	B	0.44	0.484561	B	2.39	0.921973	B
m1380	mmu-miR-9-3p	1.14	0.864585	B	1.53	0.338834	B	1.33	0.688064	B	1.79	0.291311	B
m1381	mmu-miR-9-5p	0.16	0.00917514	A	2.43	0.422898	B	0.07	0.00183883	A	1.1	0.923056	B
m1382	mmu-miR-92a-1-5p	2.91	0.056636	A	0.9	0.781272	A	3.66	0.00432595	B	1.15	0.753324
m1383	mmu-miR-92a-2-5p	31.63	0.230994	B	13.59	0.578523	B	1	1	C	0.56	0.610567	B
m1384	mmu-miR-92a-3p	0.54	0.315809		1.02	0.95406		0.28	0.0115483		0.54	0.262856
m1385	mmu-miR-92b-3p	0.89	0.812815		1.52	0.270806	A	0.61	0.24207	A	1.03	0.952124
m1386	mmu-miR-92b-5p	0.59	0.331919		0.69	0.327588		0.7	0.399172		0.79	0.609496
m1387	mmu-miR-93-3p	1.7	0.374418		1.06	0.913374		1.84	0.247969		1.18	0.800421
m1388	mmu-miR-93-5p	0.62	0.494651		1.06	0.889131		0.2	0.00337876		0.35	0.0684875
m1389	mmu-miR-935	1.6	0.396832		0.95	0.892331		1.43	0.414944		0.87	0.778148
m1390	mmu-miR-96-5p	0.67	0.516722	B	1.27	0.598306	B	0.75	0.54937	B	1.38	0.564376	B
m1391	mmu-miR-9768-3p	0.75	0.582168	A	0.54	0.109929	A	1.54	0.311668		1.12	0.821508	B
m1392	mmu-miR-9768-5p	0.06	0.432656	B	0.75	0.825834	B	0.69	0.743285	B	8.42	0.573184	B
m1393	mmu-miR-9769-3p	43.23	0.144842	B	1	1	C	1	1	C	0.02	0.199322	B
m1394	mmu-miR-9769-5p	1.05	0.920144		0.68	0.292984		0.94	0.888021		0.61	0.266827
m1395	mmu-miR-98-3p	23.1	0.317983	B	6.14	0.819621	B	1	1	C	0.34	0.367457	B
m1396	mmu-miR-98-5p	0.79	0.683491	A	0.73	0.717908	B	0.41	0.0638677	A	0.4	0.2354	B
m1397	mmu-miR-99a-3p	0.02	0.120204	B	0.38	0.465853	B	0.22	0.184571	B	3.66	0.825669	B
m1398	mmu-miR-99a-5p	1.3	0.651952		1.85	0.115915		0.44	0.0760207		0.69	0.484164
m1399	mmu-miR-99b-3p	2.74	0.300847	B	2.58	0.428769	B	0.68	0.746762	B	0.62	0.592365	B
m1400	mmu-miR-99b-5p	0.77	0.657463		1.14	0.796161		0.49	0.185682		0.75	0.614317
m1402	mmu_piR_000159/gb/DQ539904/Mus_musculus:2:73668844:73668871:Plus	0.44	0.192643	B	0.6	0.680348	B	0.29	0.0600726	B	0.42	0.437073	B
m1403	mmu_piR_000159/gb/DQ539904/Mus_musculus:6:87962871:87962898:Minus	0.51	0.187464	A	1.39	0.749037	B	0.14	0.00107224	A	0.38	0.148631	B
m1404	mmu_piR_000159/gb/DQ539904/Mus_musculus:9:118523651:118523678:Minus	0.78	0.62635		1.21	0.773184	B	0.22	0.0038294	A	0.34	0.0230399	A
m1405	mmu_piR_000216/gb/DQ540053/Mus_musculus:16:11057584:11057612:Plus	13.67	0.544067	B	1	1	C	1	1	C	0.08	0.569334	B
m1406	mmu_piR_000216/gb/DQ540053/Mus_musculus:3:83210045:83210073:Minus	40.59	0.167617	B	1	1	C	1	1	C	0.03	0.225875	B
m1407	mmu_piR_000219/gb/DQ540058/Mus_musculus:17:39455665:39455691:Plus	0.56	0.480104	B	1.32	0.821941	B	0.3	0.187172	B	0.68	0.7299	B
m1408	mmu_piR_000223/gb/DQ540081/Mus_musculus:9:54036524:54036551:Minus	0.09	0.568529	B	0.37	0.444237	B	0.66	0.72647	B	2.39	0.921973	B
m1409	mmu_piR_000362/gb/DQ540403/Mus_musculus:6:3151474:3151503:Plus	0.49	0.30462	B	0.55	0.624753	B	0.27	0.0446331	B	0.31	0.272421	B
m1410	mmu_piR_000414/gb/DQ540526/Mus_musculus:16:18446800:18446827:Minus	1.49	0.712847	B	0.42	0.492887	B	0.35	0.369029	B	0.1	0.0696974	B
m1411	mmu_piR_000414/gb/DQ540526/Mus_musculus:17:39454472:39454499:Plus	0.7	0.574925	B	1.18	0.844695	B	0.4	0.201642	B	0.65	0.576241	B
m1412	mmu_piR_000578/gb/DQ540853/Mus_musculus:17:39456112:39456137:Plus	0.8	0.705596		0.67	0.410017		0.98	0.962574		0.84	0.764208
m1413	mmu_piR_000580/gb/DQ540862/Mus_musculus:11:106317126:106317155:Plus	0.69	0.53703		5.27	0.219842	B	0.05	0.00203247		0.35	0.287201	B
m1414	mmu_piR_000585/gb/DQ540868/Mus_musculus:16:57312957:57312982:Minus	0.67	0.470509		0.83	0.85554	B	0.25	0.012475	A	0.29	0.0694812
m1415	mmu_piR_000616/gb/DQ540965/Mus_musculus:2:5296571:5296602:Minus	0.64	0.392748	A	1.9	0.539054	B	0.14	0.00224126	A	0.4	0.172401	B
m1416	mmu_piR_000616/gb/DQ540965/Mus_musculus:3:5843413:5843444:Plus	1	0.999994	B	0.61	0.6758	B	0.39	0.199264	B	0.24	0.107895	B
m1417	mmu_piR_000619/gb/DQ540976/Mus_musculus:17:39454691:39454717:Plus	0.87	0.817358		0.74	0.501147	B	0.16	0.00125375	A	0.13	0.000815949	A
m1418	mmu_piR_000620/gb/DQ540981/Mus_musculus:18:54824345:54824374:Minus	1.85	0.509317	B	1.57	0.716561	B	0.4	0.45773	B	0.32	0.268023	B
m1419	mmu_piR_000620/gb/DQ540981/Mus_musculus:3:5843782:5843811:Plus	1.02	0.973085		1.1	0.923464	B	0.27	0.0370855	A	0.31	0.0917636	A
m1420	mmu_piR_000622/gb/DQ540988/Mus_musculus:18:54824707:54824734:Minus	1.19	0.746263	B	0.73	0.571589	B	0.94	0.906236	B	0.57	0.320415	B
m1421	mmu_piR_000622/gb/DQ540988/Mus_musculus:2:5296560:5296587:Minus	1	0.997455	B	0.71	0.391313	B	1.2	0.669855	B	0.85	0.734669	B
m1422	mmu_piR_000622/gb/DQ540988/Mus_musculus:3:5843428:5843455:Plus	1.22	0.71007		1.16	0.686747		0.75	0.494604		0.71	0.477764
m1423	mmu_piR_000622/gb/DQ540988/Mus_musculus:X:112404287:112404314:Minus	1.38	0.531396	A	0.5	0.148751	B	1.15	0.751295	B	0.41	0.0938827	A
m1424	mmu_piR_000634/gb/DQ541100/Mus_musculus:5:146565397:146565424:Plus	4.71	0.835488	B	3.61	0.923845	B	1	1	C	0.93	0.957863	B
m1425	mmu_piR_000639/gb/DQ541113/Mus_musculus:17:39455268:39455298:Plus	0.64	0.414008		1.05	0.962208	B	0.21	0.0107358	A	0.33	0.0640917	A
m1426	mmu_piR_000691/gb/DQ541218/Mus_musculus:8:126424875:126424900:Minus	0.8	0.841546	B	1.68	0.681674	B	0.24	0.248466	B	0.54	0.605016	B
m1427	mmu_piR_000691/gb/DQ541218/Mus_musculus:8:126428267:126428292:Minus	0.63	0.687978	B	0.46	0.550123	B	0.42	0.443506	B	0.31	0.353455	B
m1428	mmu_piR_000691/gb/DQ541218/Mus_musculus:8:126455417:126455442:Minus	1.3	0.685566	B	1.6	0.5832	B	0.54	0.502677	B	0.7	0.608793	B
m1429	mmu_piR_000691/gb/DQ541218/Mus_musculus:8:126457090:126457115:Minus	0.69	0.624708	B	1.07	0.932632	B	0.67	0.593603	B	1.08	0.931513	B
m1430	mmu_piR_000691/gb/DQ541218/Mus_musculus:8:126462165:126462190:Minus	1.11	0.894109	B	0.83	0.850452	B	0.72	0.716418	B	0.54	0.532206	B
m1431	mmu_piR_000691/gb/DQ541218/Mus_musculus:8:126463844:126463869:Minus	6.93	0.737823	B	2.33	0.974896	B	1	1	C	0.4	0.475197	B
m1432	mmu_piR_000691/gb/DQ541218/Mus_musculus:8:126472331:126472356:Minus	2.61	0.420111	B	0.46	0.542596	B	2.47	0.486253	B	0.41	0.46942	B
m1433	mmu_piR_000691/gb/DQ541218/Mus_musculus:8:126484247:126484272:Minus	1.13	0.803206		1.1	0.852224	B	0.74	0.556536	A	0.72	0.47107	A
m1434	mmu_piR_000691/gb/DQ541218/Mus_musculus:8:126485950:126485975:Minus	0.73	0.527877	A	0.6	0.386697	B	0.7	0.462674	A	0.59	0.395964	B
m1435	mmu_piR_000691/gb/DQ541218/Mus_musculus:8:126492702:126492727:Minus	2.13	0.415627	B	1.22	0.831389	B	1.2	0.864663	B	0.71	0.69387	B
m1436	mmu_piR_000691/gb/DQ541218/Mus_musculus:8:126494409:126494434:Minus	0.97	0.974633	B	1.06	0.956822	B	0.66	0.695558	B	0.73	0.766538	B
m1437	mmu_piR_000691/gb/DQ541218/Mus_musculus:8:126502899:126502924:Minus	2.88	0.935005	B	2.33	0.974896	B	1	1	C	0.95	0.967139	B
m1438	mmu_piR_000691/gb/DQ541218/Mus_musculus:8:126509726:126509751:Minus	3.02	0.931302	B	1	1	C	1	1	C	0.35	0.947515	B
m1439	mmu_piR_000958/gb/DQ541851/Mus_musculus:17:39456228:39456254:Plus	0.78	0.688173		0.98	0.968513		0.59	0.284052		0.73	0.58186
m1440	mmu_piR_001570/gb/DQ543701/Mus_musculus:2:5296574:5296603:Minus	0.85	0.793282	B	0.9	0.911135	B	0.4	0.222156	B	0.41	0.253303	B
m1441	mmu_piR_001570/gb/DQ543701/Mus_musculus:3:5843412:5843441:Plus	1.25	0.767773	B	2.02	0.583286	B	0.08	0.0322227	B	0.13	0.0828024	B
m1442	mmu_piR_001662/gb/DQ544105/Mus_musculus:2:151104333:151104361:Minus	7.93	0.0414918	B	1.98	0.423575	B	3.16	0.366427	B	0.84	0.794155	B
m1443	mmu_piR_002435/gb/DQ546549/Mus_musculus:17:39454808:39454832:Plus	0.81	0.766236	B	0.99	0.994906	B	0.3	0.163408	B	0.35	0.318658	B
m1444	mmu_piR_002490/gb/DQ546708/Mus_musculus:11:33655010:33655039:Minus	0.76	0.805236	B	0.5	0.594956	B	0.35	0.391136	B	0.21	0.218787	B
m1445	mmu_piR_002490/gb/DQ546708/Mus_musculus:12:100046377:100046406:Plus	30.49	0.244838	B	1	1	C	1	1	C	0.03	0.275443	B
m1446	mmu_piR_002490/gb/DQ546708/Mus_musculus:13:108242188:108242217:Plus	38.81	0.173674	B	1	1	C	1	1	C	0.03	0.22366	B
m1447	mmu_piR_002490/gb/DQ546708/Mus_musculus:15:47370147:47370176:Plus	19.01	0.408174	B	1	1	C	1	1	C	0.05	0.429648	B
m1448	mmu_piR_002490/gb/DQ546708/Mus_musculus:6:109471212:109471241:Minus	22.83	0.339719	B	4.88	0.870042	B	1	1	C	0.26	0.27878	B
m1449	mmu_piR_002490/gb/DQ546708/Mus_musculus:6:44722603:44722632:Plus	13.67	0.521556	B	1	1	C	1	1	C	0.08	0.534709	B
m1450	mmu_piR_002490/gb/DQ546708/Mus_musculus:8:15519797:15519826:Plus	0.9	0.906222	B	1.23	0.872264	B	0.18	0.18156	B	0.23	0.179355	B
m1451	mmu_piR_002643/gb/DQ547181/Mus_musculus:3:5843705:5843732:Plus	0.7	0.561469		0.55	0.20522		0.69	0.480336		0.54	0.27455
m1452	mmu_piR_002896/gb/DQ547970/Mus_musculus:2:92356751:92356780:Plus	19.01	0.442574	B	1	1	C	1	1	C	0.05	0.497119	B
m1453	mmu_piR_002962/gb/DQ548183/Mus_musculus:1:133401379:133401406:Plus	0.74	0.790329	B	0.89	0.927181	B	0.48	0.535561	B	0.6	0.678756	B
m1454	mmu_piR_002962/gb/DQ548183/Mus_musculus:5:146565277:146565304:Plus	1.26	0.713049	B	0.85	0.89713	B	0.22	0.115518	B	0.14	0.0509186	B
m1455	mmu_piR_004086/gb/DQ551625/Mus_musculus:2:129969457:129969485:Plus	31.98	0.236104	B	1	1	C	1	1	C	0.03	0.271127	B
m1456	mmu_piR_004374/gb/DQ552696/Mus_musculus:18:85832427:85832456:Minus	1.63	0.336663		0.54	0.105672	A	1.54	0.309655		0.52	0.139503	A
m1457	mmu_piR_004374/gb/DQ552696/Mus_musculus:9:110126452:110126481:Plus	1.11	0.845221		0.81	0.562504		1.2	0.663474		0.87	0.766362
m1458	mmu_piR_004567/gb/DQ553409/Mus_musculus:17:39455256:39455282:Plus	0.7	0.552783		0.95	0.964142	B	0.14	0.00215514	A	0.18	0.0213286	A
m1459	mmu_piR_005109/gb/DQ555094/Mus_musculus:5:146565258:146565289:Plus	0.71	0.573134		0.58	0.156484	A	0.29	0.0215557		0.23	0.00752224	A
m1460	mmu_piR_005355/gb/DQ555882/Mus_musculus:17:39454700:39454728:Plus	1.34	0.714337	B	1.34	0.820881	B	0.28	0.297908	B	0.25	0.130024	B
m1461	mmu_piR_006717/gb/DQ561824/Mus_musculus:4:93786014:93786042:Minus	14.56	0.542296	B	2.36	0.474278	B	8.31	0.587611	B	1.58	0.713955	B
m1462	mmu_piR_007729/gb/DQ564913/Mus_musculus:17:70868542:70868571:Plus	1.56	0.440782	A	0.8	0.856564	B	0.29	0.114766	B	0.15	0.0153564	A
m1463	mmu_piR_007729/gb/DQ564913/Mus_musculus:2:102630254:102630283:Minus	0.79	0.66325	A	0.62	0.660241	B	0.28	0.010834	A	0.23	0.0603309	B
m1464	mmu_piR_007729/gb/DQ564913/Mus_musculus:9:123310826:123310855:Plus	1.65	0.494723	A	1.78	0.645985	B	0.23	0.206061	B	0.2	0.0417373	A
m1465	mmu_piR_008099/gb/DQ566224/Mus_musculus:7:72996554:72996583:Plus	1.82	0.60717	B	1.45	0.74399	B	0.97	0.980936	B	0.87	0.909423	B
m1466	mmu_piR_008225/gb/DQ566658/Mus_musculus:17:27030992:27031021:Minus	8.99	0.66144	B	14.83	0.559455	B	1	1	C	2.15	0.550742	B
m1467	mmu_piR_012641/gb/DQ689910/Mus_musculus:17:27048950:27048977:Minus	0.35	0.272361	B	0.74	0.576669	B	1.17	0.762184	B	2.26	0.441022	B
m1468	mmu_piR_013833/gb/DQ691721/Mus_musculus:5:113572781:113572810:Minus	1	1	C	1	1	C	1	1	C	1	1	C
m1469	mmu_piR_015694/gb/DQ694478/Mus_musculus:13:23691360:23691386:Minus	0.55	0.277458		0.37	0.110156	B	0.5	0.248167	A	0.35	0.0867973	A
m1470	mmu_piR_017406/gb/DQ696997/Mus_musculus:15:3117491:3117522:Minus	12.24	0.595538	B	1.05	0.954927	B	30.53	0.237742	B	3.28	0.357988	B
m1471	mmu_piR_017477/gb/DQ697102/Mus_musculus:18:67167758:67167788:Minus	54.55	0.106717	B	4.88	0.870042	B	1	1	C	0.11	0.073672	B
m1472	mmu_piR_018323/gb/DQ698371/Mus_musculus:13:44880952:44880977:Minus	2.52	0.360976	B	0.7	0.455737	B	4.21	0.0289401	B	1.25	0.772492	B
m1473	mmu_piR_018323/gb/DQ698371/Mus_musculus:14:49387992:49388017:Plus	19.28	0.38004	B	1	1	C	1	1	C	0.05	0.418602	B
m1474	mmu_piR_018323/gb/DQ698371/Mus_musculus:16:57312815:57312840:Minus	1.81	0.564263	B	0.63	0.26239	B	5.14	0.008564	B	1.97	0.359841	B
m1475	mmu_piR_018323/gb/DQ698371/Mus_musculus:6:145890159:145890184:Minus	4.71	0.843948	B	2.33	0.974896	B	1	1	C	0.59	0.66662	B
m1476	mmu_piR_018651/gb/DQ698859/Mus_musculus:17:27047687:27047714:Minus	159.99	0.0126631	A	1	1	C	1	1	C	0.01	0.0961045	A
m1477	mmu_piR_020492/gb/DQ701563/Mus_musculus:11:108827972:108827997:Minus	8.54	0.672621	B	2.33	0.974896	B	1	1	C	0.32	0.376193	B
m1478	mmu_piR_020554/gb/DQ701662/Mus_musculus:2:92351039:92351069:Plus	0.03	0.193842	B	0.22	0.246873	B	0.51	0.516743	B	3.66	0.825669	B
m1479	mmu_piR_020801/gb/DQ702018/Mus_musculus:5:115111535:115111564:Minus	1	1	C	1	1	C	1	1	C	1	1	C
m1480	mmu_piR_022097/gb/DQ703900/Mus_musculus:17:25602688:25602719:Plus	2.11	0.4491	B	0.79	0.8569	B	0.43	0.503089	B	0.15	0.0937085	B
m1481	mmu_piR_022097/gb/DQ703900/Mus_musculus:6:86369527:86369558:Plus	1.96	0.249688	A	1.24	0.824534	B	0.41	0.213973	B	0.25	0.0237246	A
m1482	mmu_piR_022828/gb/DQ704964/Mus_musculus:18:67193120:67193149:Plus	140.49	0.0114053	A	2.33	0.974896	B	1	1	C	0.02	0.00217302	A
m1483	mmu_piR_022877/gb/DQ705026/Mus_musculus:16:23024323:23024351:Plus	0.5	0.24135		0.8	0.773495	B	0.21	0.00480075	A	0.32	0.131539	A
m1484	mmu_piR_022956/gb/DQ705141/Mus_musculus:5:115112809:115112837:Minus	1.55	0.384099		0.77	0.484831		1.6	0.274195		0.79	0.585513
m1485	mmu_piR_024039/gb/DQ706752/Mus_musculus:5:113572784:113572813:Minus	3.02	0.931302	B	2.33	0.974896	B	1	1	C	0.92	0.94669	B
m1486	mmu_piR_027673/gb/DQ711996/Mus_musculus:11:106317081:106317102:Plus	0.47	0.524991	B	0.31	0.922655	B	0.18	0.174115	B	0.1	0.640658	B
m1487	mmu_piR_028709/gb/DQ713473/Mus_musculus:7:73691005:73691033:Plus	8.52	0.00261418	A	1.7	0.290861	A	3.15	0.17379	B	0.7	0.532964
m1488	mmu_piR_032865/gb/DQ719430/Mus_musculus:2:116876592:116876614:Plus	0.04	0.308466	B	0.76	0.820963	B	0.14	0.109679	B	2.39	0.921973	B
m1489	mmu_piR_032974/gb/DQ719597/Mus_musculus:4:130021751:130021778:Plus	0.69	0.582405		0.53	0.198119	B	0.15	0.00101865	A	0.11	0.00458534	A
A: This miRNA's average molecular tag count, and thus its expression level, is relatively low (< 10) in either the Control or the Test Group and is reasonably high in the other Group (> 10).
This result suggests that the actual fold-change value is at least as large as the calculated and reported fold-change result.
This fold-change result may also have greater variations if p value > 0.05; therefore, it is important to have a sufficient number of biological replicates to validate the result for this miRNA.
B: This miRNA's average molecular tag count, and thus its expression level, is relatively low (< 10), in both the Control and Test Groups.
This fold-change result may have greater variations; therefore, it is important to have a sufficient number of biological replicates to validate the result for this miRNA.
C: This miRNA has molecular tag count of zero in both the Control and Test Groups meaning that its expression was undetected, making this fold-change result erroneous and un-interpretable.
Fold Change & Fold Regulation:
Fold-Change is the normalized miRNA expression in each Test Sample divided the normalized miRNA expression in the Control Sample.
Fold-Regulation represents fold-change results in a biologically meaningful way. Fold-change values greater than one indicate an up-regulation, and the fold-regulation is equal to the fold-change.
Fold-change values less than one indicate a down-regulation, and the fold-regulation is the negative inverse of the fold-change.
Fold-change and fold-regulation values greater than 2 are indicated in red; fold-change values less than 0.5 and fold-regulation values less than -2 are indicated in blue.
p-value:
For the geNorm and Total Molecular Tag Count normalization methods, the p values are calculated based on a Student's t-test of the replicate normalized miRNA expression values for each miRNA in the control group and treatment groups.
For the DESeq2 and Trimmed Mean of M (edgeR) normalization methods, the p values listed were returned by the respective Bioconductor software packages.
Any p values less than 0.05 are indicated in red. Each Group (including the control) must contain at least 3 Samples for the software to calculate p-values.
